# Supplementary material for: Stereoselective synthesis of conjugated α-Z/γ-E and α-Z/γ-Z dienoic acids. Kinetic torquoselectivity versus thermodynamic control
Source: Royal Society of Chemistry journal article supplement (doi:10.1039/c3ra45309j), 2013-10-21

## Supporting Information

### **Stereoselective Synthesis of Conjugated $\alpha$ -Z/ $\gamma$ -E – and $\alpha$ -Z/ $\gamma$ -Z Dienoic acids. Kinetic torquoselectivity *versus* thermodynamic control**

Jyoti Agarwal, Ouahiba Bayounes, Serge Thorimbert\* and Luc Dechoux\*

*UPMC Univ Paris 06. Institut Parisien de Chimie Moléculaire (UMR CNRS 7201), 4 place Jussieu, 75005 Paris, France.*

[serge.thorimbert@upmc.fr](mailto:serge.thorimbert@upmc.fr), [luc.dechoux@upmc.fr](mailto:luc.dechoux@upmc.fr)

#### Table of Content

|                                                                            |           |
|----------------------------------------------------------------------------|-----------|
| <b>1- General Experimental Conditions</b>                                  | <b>2</b>  |
| <b>2- General Procedure for the Preparation of Carboxylates 3:</b>         | <b>2</b>  |
| <b>3- General Procedure for the Preparation of Carboxylic Acids 4:</b>     | <b>3</b>  |
| <b>4- General Procedure for the Preparation of Unsaturated Lactones 5:</b> | <b>8</b>  |
| <b>5- Copies of 1-H and 13-C NMR</b>                                       | <b>11</b> |

## 1- General Experimental Conditions

Unless otherwise noted, reactions were carried out under argon atmosphere with magnetic stirring in redistilled solvents when necessary. Reagents and chemicals were purchased from commercial sources and used as received. Merck 60F<sub>254</sub> silica gel was used for thin-layer chromatography (TLC) and Merck Geduran SI 60 Å silica gel 60 (40-63 μM) was used for flash column chromatography. IR spectra were recorded from a Bruker Tensor 27 ATR diamond PIKE spectrophotometer. NMR <sup>1</sup>H, <sup>13</sup>C spectra were recorded at 400 and 100 MHz, respectively, using a Bruker AVANCE 400 spectrometer equipped with a BBFO probe. Some NMR <sup>1</sup>H, <sup>13</sup>C spectra were recorded at 75 or 62.5 MHz using a Bruker AVANCE 300 or 250. Chemical shifts are reported in ppm, using, for <sup>1</sup>H and <sup>13</sup>C, solvent residual peak as internal standard references. Coupling constants (*J*) are given in Hertz (Hz), multiplicity (s = singlet, d = doublet, t = triplet, q = quartet, m = multiplet). High resolution mass spectra (HRMS) were recorded on a LTQ-Orbitrap Mass Spectrometer [Thermo Scientific].

## 2- General Procedure for the Preparation of Carboxylates 3:

TMSCl (120 μL, 1 mmol) was added under argon to a solution of methylcoumalate (154 mg, 1 mmol) in dry THF (10 mL) at 0°C and the resulting mixture was stirred for 15 minutes. Then Grignard reagent (1.2 equiv.) was added dropwise, and the mixture was stirred for 15 minutes. The mixture was evaporated to get the anion.

## 4-Methoxycarbonyl-hepta-2,4,6-trienoic acid anion 3a/3a' (ratio 3a/3a': 60/40)

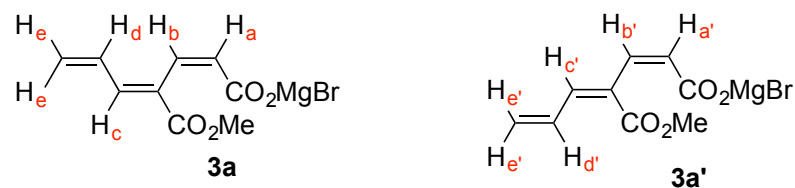

<sup>1</sup>H NMR (400 MHz, MeOD) δ (ppm): 3.72 (3H, s, OCH<sub>3</sub>) 5.46-5.65 (2H, m, H<sub>e</sub>, H<sub>e'</sub>) 5.87 (0.4H, d, *J* = 12 Hz, H<sub>a</sub>), 6.05 (0.6H, d, *J* = 12 Hz, H<sub>a'</sub>), 6.47 (0.6H, d, *J* = 12 Hz, H<sub>b</sub>), 6.58 (0.4H, d, *J* = 12 Hz, H<sub>b'</sub>), 6.61-6.70 (1H, H<sub>c</sub>, H<sub>d'</sub>), 6.99-7.09 (1H, m, H<sub>c'</sub>, H<sub>d</sub>).

#### 4-Methoxycarbonyl-hexa-2,4-dienoic acid anion **3i**

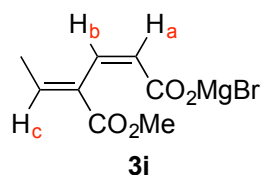

$^1\text{H}$  NMR (250 MHz, MeOD)  $\delta$  (ppm): 1.80 (3H, d,  $J = 7.2$  Hz, Me), 3.35 (3H, s,  $\text{CO}_2\text{CH}_3$ ), 6.02 (1H, d,  $J = 12$  Hz, Ha) 6.43 (1H, dd,  $J = 12.0, 1.2$  Hz, Hb), 6.75 (1H, qd,  $J = 7.2, 1.2$  Hz, Hc).

#### 3- General Procedure for the Preparation of Carboxylic Acids 4:

To a solution of methyl coumalate (2 mmol, 308 mg) in dry THF (20 mL) at 0 °C, under argon atmosphere, trimethylsilyl chloride (2 mmol, 0.25 mL) was added slowly. After 15 minutes stirring, Grignard reagent (1-2 equiv.) was added dropwise and the resulting solution was further stirred for 1-2 hr. Then, the reaction was quenched with saturated aq. sodium bicarbonate solution and washed with dichloromethane. The aqueous layer, containing the product as its sodium salt, was then acidified by adding dilute HCl and product was extracted with dichloromethane. The organic layers were pooled, dried over anhydrous  $\text{MgSO}_4$  and evaporated to afford the pure product.

#### 4-Allylidene-pent-2-enedioic acid 5-methyl ester **4a'**/**4a**

Ratio **4a'**/**4a**: 90:10

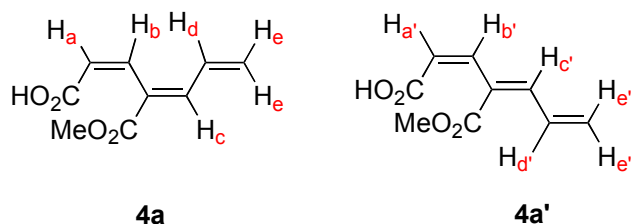

IR (KBr)  $\nu_{\text{max}}$ :  $\text{cm}^{-1}$ : 2953, 1701, 1436, 1193.  $^1\text{H}$  NMR (250 MHz,  $\text{CDCl}_3$ )  $\delta$  (ppm): 3.77 (3H, s,  $\text{OCH}_3$ ) 5.51-5.67 (2H, m,  $\text{H}_e$  &  $\text{H}_{e'}$ ) 5.86 (0.9H, d,  $J = 12.2$  Hz,  $\text{H}_{a'}$ ) 6.06 (0.1H, d,  $J = 11.7$  Hz,  $\text{H}_a$ ) 6.50 (0.1H, d,  $J = 11.7$  Hz,  $\text{H}_b$ ) 6.60 (0.9 H, d,  $J = 12.2$  Hz,  $\text{H}_{b'}$ ) 6.64 (0.9H, d,  $J = 6.2$  Hz,  $\text{H}_{d'}$ ) 6.85 (0.1H, dd,  $J = 12.0, 7, 1$  Hz,  $\text{H}_c$ ) 7.02-7.23 (1H, m,  $\text{H}_{c'}$  &  $\text{H}_d$ ) 10.43 (1H, br. s,  $\text{CO}_2\text{H}$ ).  $^{13}\text{C}$  NMR (100 MHz,  $\text{CDCl}_3$ )  $\delta$  (ppm): 51.8 ( $\text{OCH}_3$ ) 52.2 ( $\text{OCH}_3$ ) 119.7 (CH) 123.6 (CH) 127.1 ( $\text{CH}_2$ ) 127.2 ( $\text{CH}_2$ ) 128.0 ( $\underline{\text{C}}(\text{CO}_2\text{Me})$ ) 129.1 ( $\underline{\text{C}}(\text{CO}_2\text{Me})$ ) 131.8 (CH) 132.9 (CH) 138.7 (CH)

141.0 (CH) 142.7 (CH) 144.6 (CH) 166.0 (CO) 166.70 (CO) 170.3 (CO) 170.7 (CO). HRMS (ES<sup>+</sup>): for (M<sup>+</sup>+Na) C<sub>9</sub>H<sub>10</sub>O<sub>4</sub>Na, calcd. 205.04713, found 205.04712.

#### 4-Propenylidene-pent-2-enedioic acid 5-methyl ester 4b/4b'

Ratio 4a'(2 diastereoisomers)/4a (2 diastereoisomers): 50:50

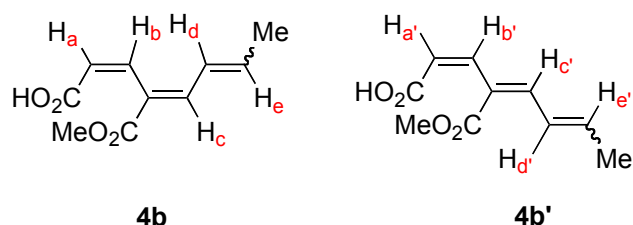

IR (KBr)  $\nu_{\text{max}}$ : cm<sup>-1</sup>: 2952, 1692, 1630, 1435, 1235. <sup>1</sup>H NMR (250 MHz, CDCl<sub>3</sub>)  $\delta$  (ppm): 1.75 (3H, (4X) m, CH<sub>3</sub>), 3.72 (0.75H, s, OCH<sub>3</sub>), 3.74 (2.25H, s, OCH<sub>3</sub>), 5.83 (0.5H, dd,  $J = 10.0, 7.5$  Hz CH) 6.26-6.01 (1.75H, m, CH), 6.73-6.63 (2H, m, CH) 6.87 (0.25H, d,  $J = 11.7$  Hz, H<sub>b</sub>), 7.03 (0.25H, d,  $J = 10.0$ , Hz, CH), 7.57 (0.25H, d,  $J = 10.0$ , Hz, CH). <sup>13</sup>C NMR (100 MHz, CDCl<sub>3</sub>)  $\delta$  (ppm): 13.72 (CH<sub>3</sub>), 14.06 (CH<sub>3</sub>), 18.97 (CH<sub>3</sub>), 19.01 (CH<sub>3</sub>), 51.48 (OCH<sub>3</sub>), 51.55 (OCH<sub>3</sub>), 51.87 (OCH<sub>3</sub>), 51.94 (OCH<sub>3</sub>), 118.41 (CH), 118.69 (CH), 122.92 (CH), 123.25 (CH), 124.29 (CH), 125.29 (CH), 126.70 (C(CO<sub>2</sub>Me)), 126.96 (CH), 128.00 (C(CO<sub>2</sub>Me)), 128.00 (C(CO<sub>2</sub>Me)), 129.1 (C(CO<sub>2</sub>Me)) 128.16 (CH), 135.28 (CH), 137.41 (CH), 138.56 (CH), 138.58 (CH), 138.71 (CH), 141.38 (CH), 141.43 (CH), 142.00 (CH), 142.99 (CH), 143.03 (CH), 145.30 (CH), 170.67 (CO), 170.74 (CO), 171.01 (CO), 171.10 (CO). HRMS (ES<sup>+</sup>): for (M<sup>+</sup>+Na) C<sub>10</sub>H<sub>12</sub>O<sub>4</sub>Na, calcd. 219.06278, found 219.06283.

#### 4-Prop-2'-methylidene-pent-2-enedioic acid 5-methyl ester 4c/4c'

Ratio 4c (2 diastereoisomers)/4c'(2 diastereoisomers): 70:30

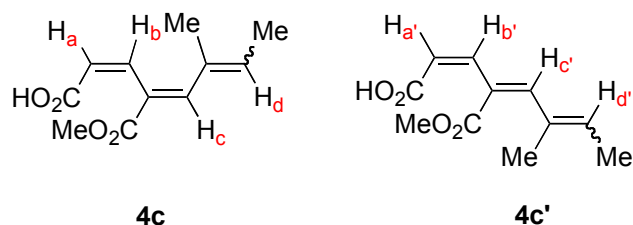

IR (KBr)  $\nu_{\text{max}}$ : cm<sup>-1</sup>: 2954, 1707, 1625, 1436, 1259, 1242, 1199. <sup>1</sup>H NMR (400 MHz, CDCl<sub>3</sub>)  $\delta$  (ppm): 1.55 (t,  $J = 1.6$  Hz, 0.9 H, CH<sub>3</sub>), 1.59 (d,  $J = 7.2$  Hz, 2.1 H, CH<sub>3</sub>), 1.81-1.77 (m, 0.9 H,

CH<sub>3</sub>), 1.83 (t,  $J = 1.2$  Hz, 2.1 H, CH<sub>3</sub>), 3.68 (s, 0.9 H, OCH<sub>3</sub>), 3.71 (s, 2.1 H, OCH<sub>3</sub>), 5.66 (dd,  $J = 6.0, 13.2$  Hz, 0.7 H, H<sub>d</sub>), 5.86-5.78 (m, 0.3 H, H<sub>d'</sub>), 5.96 (dd,  $J = 1.2, 12.0$  Hz, 1 H, 0.7 H<sub>a</sub> & 0.3 H<sub>a'</sub>), 6.75 (dd,  $J = 2.0, 12.0$  Hz, 0.7 H, H<sub>b</sub>), 6.89 (dd,  $J = 1.6, 11.6$  Hz, 0.3 H, H<sub>b'</sub>), 7.29 (s, 0.7 H, H<sub>c</sub>), 7.12 (s, 0.3 H, H<sub>c'</sub>). <sup>13</sup>C NMR (100 MHz, CDCl<sub>3</sub>) δ (ppm): 14.6 (CH<sub>3</sub>), 15.1 (CH<sub>3</sub>), 16.0 (CH<sub>3</sub>), 23.0 (CH<sub>3</sub>), 51.9 (OCH<sub>3</sub>), 52.0 (OCH<sub>3</sub>), 121.8 (CH), 131.7 (CH), 122.0 (CH), 125.4 (C), 128.0 (C), 131.5 (C), 133.0 (C), 136.1 (CH), 140.6 (CH), 140.8 (CH), 140.9 (CH), 145.8 (CH), 167.5 (CO), 167.6 (CO), 171.2 (CO), 171.3 (CO). HRMS (ES<sup>+</sup>): for (M<sup>+</sup>+Na) C<sub>11</sub>H<sub>14</sub>O<sub>4</sub>Na, calcd. 233.0784, found 233.0785.

#### 4-Prop-2-ynylidene-pent-2-enedioic acid 5-methyl ester 4d/4d'.

Ratio 4d'/4d (Z,Z)/(Z,E): 50:50

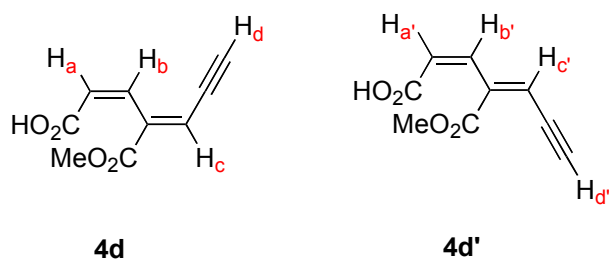

IR (KBr)  $\nu_{\max}$ : cm<sup>-1</sup>: 2959, 2162, 1685, 1433. <sup>1</sup>H NMR (300 MHz, CDCl<sub>3</sub>) δ (ppm): 3.71 (0.5H, d,  $J = 2.7$  Hz, H<sub>d</sub>) 3.70 (0.5H, dd,  $J = 2.4, 0.6$  Hz, H<sub>d</sub>) 3.75 (1.5H, s, OCH<sub>3</sub>) 3.79 (1.5H, s, OCH<sub>3</sub>) 5.96 (0.5H, dd,  $J = 12.3, 0.6$  Hz, H<sub>a</sub>) 6.09 (0.5H, dd,  $J = 11.7, 0.9$  Hz, H<sub>a</sub>) 6.15-6.20 (0.5H, m, H<sub>c</sub>) 6.61-6.73 (1H, m, 0.5 H<sub>b</sub> & 0.5 H<sub>c</sub>) 6.96 (0.5H, ddd,  $J = 12.0, 1.8, 0.6$  Hz, H<sub>b</sub>) 8.0-9.5 (1H, br. s, COOH). <sup>13</sup>C NMR (75 MHz, CDCl<sub>3</sub>) δ (ppm): 52.1 (OCH<sub>3</sub>), 52.5 (OCH<sub>3</sub>), 79.2 (C), 79.5 (C), 91.2 (C), 92.7 (C), 115.1 (CH), 121.1 (CH), 121.8 (CH), 121.9 (CH), 124.0 (CH), 138.0 (CH), 140.3 (C), 140.5 (C), 140.6 (CH), 165.0 (CO), 165.5 (CO), 170.3 (CO), 170.7 (CO). HRMS (ES<sup>+</sup>): for (M<sup>+</sup>+Na) C<sub>9</sub>H<sub>8</sub>O<sub>4</sub>Na, calcd. 203.03147, found 203.03148.

#### 4-But-2-ynylidene-pent-2-enedioic acid 5-methyl ester **4e/4e'**.

Ratio **4e'**/**4e** (Z,Z)/(Z,E): 70:30

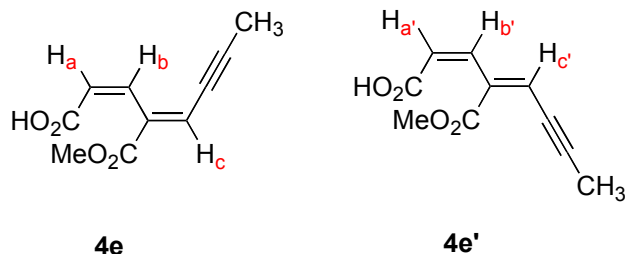

IR (KBr)  $\nu_{\max}$ :  $\text{cm}^{-1}$ : 2950, 2213, 1723, 1685, 1609, 1436.  $^1\text{H}$  NMR (400 MHz,  $\text{CDCl}_3$ )  $\delta$  (ppm): 2.06 (0.9H, d,  $J = 2.8$  Hz,  $\text{CH}_3$ ) 2.08 (2.1 H, d,  $J = 2.8$  Hz,  $\text{CH}_3$ ) 3.72 (0.9H, s,  $\text{OCH}_3$ ) 3.76 (2.1H, s,  $\text{OCH}_3$ ) 5.86 (0.7H, d,  $J = 12.0$  Hz, H<sub>a</sub>) 6.03 (0.3H, dd,  $J = 12.0, 0.8$  Hz, H<sub>a</sub>) 6.18 (0.7H, d,  $J = 2.4$  Hz, H<sub>c</sub>) 6.68-6.54 (1H, m, 0.3 H<sub>c</sub> & 0.7 H<sub>b</sub>) 6.97 (0.3H, dd,  $J = 12.0, 0.8$  Hz, H<sub>b</sub>) 11.0 (1H, br. s, COOH).  $^{13}\text{C}$  NMR (75 MHz,  $\text{CDCl}_3$ )  $\delta$  (ppm): 5.2 ( $\text{CH}_3$ ), 5.4 ( $\text{CH}_3$ ), 51.9 ( $\text{OCH}_3$ ), 52.2 ( $\text{OCH}_3$ ), 76.4 (C), 76.9 (C), 101.9 (C), 102.5 (C), 120.3 (CH<sub>a</sub>), 123.1 (CH<sub>a</sub>), 123.7 (CH<sub>c</sub>), 124.5 (CH<sub>c</sub>), 137.4 (CH<sub>b</sub>), 137.7 (C), 138.4 (C), 141.1 (CH<sub>b</sub>), 165.5 (CO), 166.1 (CO), 170.9 (CO), 171.4 (CO). HRMS (ES<sup>+</sup>): for ( $\text{M}^+$ +Na)  $\text{C}_{10}\text{H}_{10}\text{O}_4\text{Na}$ , calcd. 217.0471, found 217.0469.

#### 4-Benzylidene-pent-2-enedioic acid 5-methyl ester **4f**

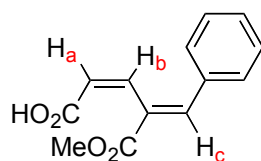

IR (KBr)  $\nu_{\max}$ :  $\text{cm}^{-1}$ : 2951, 1708, 1629, 1434, 1256, 1175.  $^1\text{H}$  NMR (400 MHz,  $\text{CDCl}_3$ )  $\delta$  (ppm): 3.78 (s, 3 H,  $\text{OCH}_3$ ), 6.17 (dd,  $J = 0.8, 11.6$  Hz, 1 H, H<sub>a</sub>), 6.89 (dd,  $J = 2.0, 11.6$  Hz, 1 H, H<sub>b</sub>), 7.45-7.35 (m, 5 H, Ph), 7.69 (d,  $J = 0.8$  Hz, H<sub>c</sub>).  $^{13}\text{C}$  NMR (100 MHz,  $\text{CDCl}_3$ )  $\delta$  (ppm): 50.2 ( $\text{OCH}_3$ ), 123.6 (CH), 128.4 (C), 128.5 (CH), 129.7 (CH), 130.6 (CH), 134.4 (C), 140.1 (CH), 141.4 (CH), 167.1 (CO), 171.2 (CO). HRMS (ES<sup>+</sup>): for ( $\text{M}^+$ +Na)  $\text{C}_{13}\text{H}_{12}\text{O}_4\text{Na}$ , calcd. 255.0628, found 255.0627.

#### 4-Thiophenyl-pent-2-enedioic acid 5-methyl ester 4g

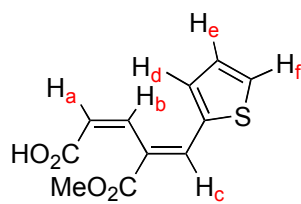

**4g**

IR (KBr)  $\nu_{\max}$ :  $\text{cm}^{-1}$ : 2956, 1709, 1682, 1621, 1434, 1260, 1205.  $^1\text{H}$  NMR (400 MHz,  $\text{CDCl}_3$ )  $\delta$  (ppm): 3.75 (s, 3 H,  $\text{OCH}_3$ ), 6.19 (dd,  $J = 0.8, 11.6$  Hz, 1 H,  $\text{H}_a$ ), 7.04 (dd,  $J = 2.0, 11.6$  Hz, 1 H,  $\text{H}_b$ ), 7.11 (dd,  $J = 3.6, 5.2$  Hz, 1 H,  $\text{H}_e$ ), 7.30 (d,  $J = 4.0$  Hz, 1 H,  $\text{H}_d$ ), 7.53 (d,  $J = 5.2$  Hz, 1 H,  $\text{H}_f$ ), 7.83 (dd,  $J = 0.8, 2.0$  Hz, 1 H,  $\text{H}_c$ ).  $^{13}\text{C}$  NMR (100 MHz,  $\text{CDCl}_3$ )  $\delta$  (ppm): 52.2 ( $\text{OCH}_3$ ), 124.7 ( $\text{CH}_a$ ), 125.0 ( $\text{CH}_e$ ), 127.9 (C), 131.4 ( $\text{CH}_f$ ), 133.1 ( $\text{CH}_d$ ), 133.2 ( $\text{CH}_c$ ), 138.1 (C), 139.5 ( $\text{CH}_b$ ), 166.7 (CO), 170.9 (CO). HRMS (ES<sup>+</sup>): for ( $\text{M}^+ + \text{Na}$ )  $\text{C}_{11}\text{H}_{10}\text{O}_4\text{NaS}$ , calcd. 261.0192, found 261.0189.

#### 4-Cyclopropyl-pent-2-enedioic acid 5-methyl ester 4h

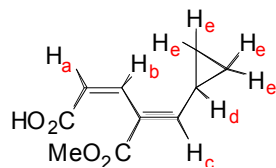

$^1\text{H}$  NMR (300 MHz,  $\text{CDCl}_3$ )  $\delta$  (ppm): 0.71 (m, 2 H,  $\text{H}_e$ ), 1.00 (m, 2 H,  $\text{H}_e$ ), 1.65-1.48 (m, 1 H,  $\text{H}_d$ ), 3.70 (s, 3 H,  $\text{OCH}_3$ ), 6.05 (d,  $J = 14.4$  Hz, 1 H,  $\text{H}_a$ ), 6.23 (d,  $J = 13.2$  Hz, 1 H,  $\text{H}_c$ ), 6.92 (dd,  $J = 1.5, 12.6$  Hz, 1 H,  $\text{H}_b$ ).  $^{13}\text{C}$  NMR (75 MHz,  $\text{CDCl}_3$ )  $\delta$  (ppm): 9.25 ( $\text{CH}_2$ ), 12.8 (CH), 51.8, ( $\text{OCH}_3$ ), 122.5 (CH), 126.1 (C), 139.0 (CH), 151.7 (CH), 166.5 (CO), 171.0 (CO). HRMS (ES<sup>+</sup>): for ( $\text{M}^+ + \text{Na}$ )  $\text{C}_{10}\text{H}_{12}\text{O}_4\text{Na}$ , calcd. 219.06278, found 219.06282.

#### 4-Ethylidene-pent-2-enedioic acid 5-methyl ester 4i

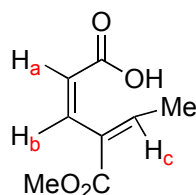

$^1\text{H}$  NMR (250 MHz,  $\text{CDCl}_3$ )  $\delta$  (ppm) : 1.82 (3H, d,  $J = 7.2$  Hz,  $\text{CH}_3$ ), 3.71 (3H, s,  $\text{OCH}_3$ ), 6.02 (1H, d,  $J = 11.7$  Hz,  $\text{H}_a$ ), 6.71 (1H, d,  $J = 11.7$  Hz,  $\text{H}_b$ ), 6.92 (1H, q,  $J = 7.2$  Hz,  $\text{H}_c$ ), 9.08 (1H,

br. s, CO<sub>2</sub>H). <sup>13</sup>C NMR (75 MHz, CDCl<sub>3</sub>) δ (ppm): 30.0 (CH<sub>3</sub>), 51.8 (OCH<sub>3</sub>), 122.8 (CH), 129.4 (C), 139.1 (CH), 142.3 (CH), 166.5 (CO), 172.1 (CO).

#### 4-Ethyl-pent-2-enedioic acid 5-methyl ester 4j

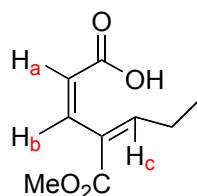

IR (KBr)  $\nu_{\text{max}}$ : cm<sup>-1</sup>: 2954, 1708, 1432, 1349, 1258. <sup>1</sup>H NMR (250 MHz, CDCl<sub>3</sub>) δ (ppm): 1.04 (t,  $J = 7.5$  Hz, 3 H, CH<sub>3</sub>), 2.17 (quintet,  $J = 7.5$  Hz, 2 H, CH<sub>2</sub>), 3.70 (s, 3 H, OCH<sub>3</sub>), 6.01 (d,  $J = 12.5$  Hz, 1 H, H<sub>a</sub>), 6.85-6.75 (m, 2 H, H<sub>b</sub> & H<sub>c</sub>).

#### 4-Isobutylidene-pent-2-enedioic acid 5-methyl ester 4k

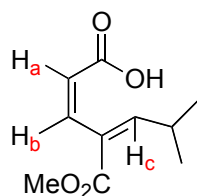

<sup>1</sup>H NMR (250 MHz, CDCl<sub>3</sub>) δ (ppm): 1.01 (3H, d,  $J = 6.8$  Hz, CH(CH<sub>3</sub>)<sub>2</sub>) 1.20 (3H, d,  $J = 6.4$  Hz, CH(CH<sub>3</sub>)<sub>2</sub>) 2.52-2.62 (1H, m, CH(CH<sub>3</sub>)<sub>2</sub>) 3.82 (3H, s, CO<sub>2</sub>CH<sub>3</sub>) 6.02 (1H, d,  $J = 12.4$  Hz, H<sub>a</sub>) 6.63 (1H, d,  $J = 10.4$  Hz, H<sub>c</sub>) 6.79 (1H, dd,  $J = 11.6, 2.0$  Hz, C<sub>b</sub>). <sup>13</sup>C NMR (100 MHz, CDCl<sub>3</sub>) δ (ppm): 17.50 (CH<sub>3</sub>), 20.13(CH<sub>3</sub>), 45.13 (CH), 52.24 (CO<sub>2</sub>CH<sub>3</sub>), 122.92 (CH), 127.42 (C), 138.87 (CH), 151.91 (CH), 165.77 (CO<sub>2</sub>H), 169.15 (CO<sub>2</sub>CH<sub>3</sub>).

#### 4- General Procedure for the Preparation of Unsaturated Lactones 5:

To a solution of methyl coumalate (2 mmol, 308 mg) in dry THF (20 mL) at 0 °C, under argon atmosphere, trimethylsilyl chloride (2 mmol, 0.25 mL) was added slowly. After 15 minutes stirring, Grignard reagent (1-2 equiv.) was added dropwise and the resulting solution was further stirred for 1-2 hr. Then the reaction was quenched with saturated aq. sodium bicarbonate solution and extracted twice with dichloromethane. The organic layers, were dried



over anhydrous  $\text{MgSO}_4$  and evaporated under reduced pressure. The residue was chromatographed on silica gel (Ethyl acetate / cyclohexane).

### 2-Phenyl-6-oxo-5,6-dihydro-2H-pyran-3-carboxylic acid methyl ester 5f

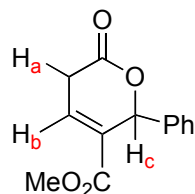

$^1\text{H}$  NMR (250 MHz,  $\text{CDCl}_3$ )  $\delta$  (ppm): 3.19 (td,  $J = 2.5, 22.2$  Hz,  $\text{H}_a$ ), 3.37 (ddd,  $J = 1.5, 5.5, 22.0$  Hz,  $\text{H}_a$ ), 3.77 (s, 3 H,  $\text{OCH}_3$ ), 6.38 (t,  $J = 1.5$  Hz, 1 H,  $\text{H}_c$ ), 7.21 (dd,  $J = 2.7, 5.7$  Hz, 1 H,  $\text{H}_b$ ), 7.43-7.35 (m, 5 H, Ph).  $^{13}\text{C}$  NMR (62.5 MHz,  $\text{CDCl}_3$ )  $\delta$  (ppm): 30.7 ( $\text{CH}_2$ ), 52.2 ( $\text{OCH}_3$ ), 79.8 (CH), 126.8 (CH), 128.8 (CH), 129.0 (CH), 129.7 (C), 134.1 (CH), 136.9 (C), 166.3 (CO), 167.4 (CO).

### 2-Cyclopropyl-6-oxo-5,6-dihydro-2H-pyran-3-carboxylic acid methyl ester 5h

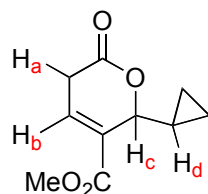

IR (KBr)  $\nu_{\text{max}}$ :  $\text{cm}^{-1}$ : 1707, 1434, 1340, 1258.  $^1\text{H}$  NMR (300 MHz,  $\text{CDCl}_3$ )  $\delta$  (ppm): 0.68-0.48 (m, 4 H,  $\text{CH}_2$ ), 1.14-1.01 (m, 1 H,  $\text{H}_d$ ), 1.78-1.76 (m, 4 H,  $\text{CH}_2$ ), 3.28 (m,  $\text{H}_a$  &  $\text{H}_a'$ ), 3.81 (s, 3 H,  $\text{OCH}_3$ ), 4.84 (td,  $J = 1.8, 9.9$  Hz, 1 H,  $\text{H}_c$ ), 7.01 (dd,  $J = 4.2, 5.7$  Hz, 1 H,  $\text{H}_b$ ).  $^{13}\text{C}$  NMR (100 MHz,  $\text{CDCl}_3$ )  $\delta$  (ppm): 3.0 ( $\text{CH}_2$ ), 3.2 ( $\text{CH}_2$ ), 16.0 (CH), 30.7 ( $\text{CH}_a$ ), 52.2 ( $\text{OCH}_3$ ), 82.0 ( $\text{CH}_c$ ), 131.0 (C), 133.1 ( $\text{CH}_b$ ), 164.0 (CO), 168.3 (CO).

### 2-Methyl-6-oxo-5,6-dihydro-2H-pyran-3-carboxylic acid methyl ester 5i

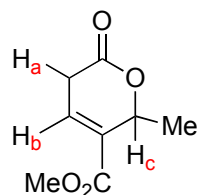

$^1\text{H}$  NMR (400 MHz,  $\text{CDCl}_3$ )  $\delta$  (ppm): 1.43 (3H, d,  $J = 6.4$  Hz,  $\text{CH}_3$ ), 3.10-3.29 (2H, m,  $\text{H}_a$ ), 3.71 (3H, s,  $\text{OCH}_3$ ), 5.31 (1H, qt,  $J = 6.8, 2.0$  Hz,  $\text{H}_c$ ), 6.88 (1H, dd,  $J = 5.0, 2.8$  Hz,  $\text{H}_b$ ).  $^{13}\text{C}$  NMR (100 MHz,  $\text{CDCl}_3$ )  $\delta$  (ppm): 21.68 ( $\text{CH}_3$ ), 30.02 ( $\text{CH}_a$ ), 52.10 ( $\text{OCH}_3$ ), 75.62 ( $\text{CH}_c$ ), 131.60 ( $\text{C}(\text{CO}_2\text{CH}_3)$ ), 132.56 ( $\text{CH}_b$ ), 163.64 (CO), 167.53 (CO).

### 2-Ethyl-6-oxo-5,6-dihydro-2H-pyran-3-carboxylic acid methyl ester 5j

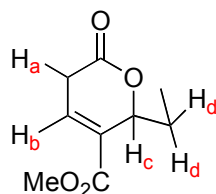

IR (KBr)  $\nu_{\text{max}}$ :  $\text{cm}^{-1}$ : 2954, 1708, 1671, 1432, 1349, 1258, 1216, 1183.  $^1\text{H}$  NMR (400 MHz,  $\text{CDCl}_3$ )  $\delta$  (ppm): 0.10 (t,  $J = 7.6$  Hz, 3 H,  $\text{CH}_3$ ), 1.74 (m, 1 H,  $\text{H}_d$ ), 1.96 (m, 1 H,  $\text{H}_d$ ), 3.19 (td,  $J = 2.8, 22.8$  Hz,  $\text{H}_a$ ), 3.28 (ddd,  $J = 1.6, 5.2, 22.4$  Hz,  $\text{H}_a$ ), 3.32 (s, 3 H,  $\text{OCH}_3$ ), 5.32-5.26 (m, 1 H,  $\text{H}_c$ ), 7.00 (dd,  $J = 2.8, 5.2$  Hz, 1 H,  $\text{H}_b$ ).  $^{13}\text{C}$  NMR (100 MHz,  $\text{CDCl}_3$ )  $\delta$  (ppm): 8.8 ( $\text{CH}_3$ ), 28.7 ( $\text{CH}_2$ ), 30.3 ( $\text{CH}_a$ ), 52.2 ( $\text{OCH}_3$ ), 80.3 ( $\text{CH}_c$ ), 130.2 (C), 133.1 ( $\text{CH}_b$ ), 163.8 (CO), 167.7 (CO). HRMS (ES $^+$ ): for ( $\text{M}^+$ +Na)  $\text{C}_9\text{H}_{12}\text{O}_4\text{Na}$ , calcd. 207.0628, found 207.0626.

### 2-Isopropyl-6-oxo-5,6-dihydro-2H-pyran-3-carboxylic acid methyl ester 5k

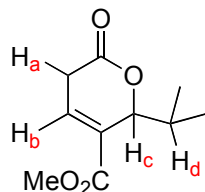

$^1\text{H}$  NMR (400 MHz,  $\text{CDCl}_3$ )  $\delta$  (ppm): 0.87 (3H, d,  $J = 6.8$  Hz,  $\text{CH}(\text{CH}_3)_2$ ), 1.09 (3H, d,  $J = 6.8$  Hz,  $\text{CH}(\text{CH}_3)_2$ ), 2.09-2.17 (1H, m,  $\text{CH}(\text{CH}_3)_2$ ), 3.14-3.29 (1H, m,  $\text{H}_a$ ), 3.79 (3H, s,  $\text{OCH}_3$ ), 5.21 (1H, dt,  $J = 3.6, 2.4$  Hz,  $\text{H}_c$ ), 7.02 (1H, dd,  $J = 4.8, 2.8$  Hz,  $\text{H}_b$ ).  $^{13}\text{C}$  NMR (100 MHz,  $\text{CDCl}_3$ )  $\delta$  (ppm): 15.7 ( $\text{CH}(\text{CH}_3)_2$ ), 19.2 ( $\text{CH}(\text{CH}_3)_2$ ), 30.7 ( $\text{CH}_a$ ), 34.0 ( $\text{CH}(\text{CH}_3)_2$ ), 52.3 ( $\text{OCH}_3$ ), 84.0 ( $\text{CH}_c$ ), 129.8 ( $\text{C}(\text{CO}_2\text{CH}_3)$ ), 133.5 ( $\text{CH}_b$ ), 164.3 ( $\text{CO}_2$ ), 167.9 ( $\text{CO}_2$ ). HRMS (ES $^+$ ): for ( $\text{M}^+$ +Na)  $\text{C}_{10}\text{H}_{14}\text{O}_4\text{Na}$ , calcd. 221.0777, found 221.0784.

LDOB-04/2  
Spectre 1H routine en 8 Scan

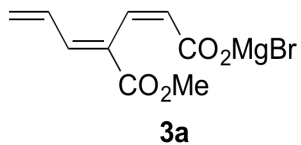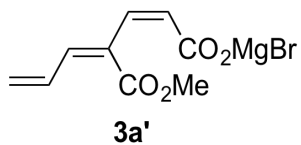

7.13  
7.09  
7.06  
7.04  
7.02  
7.02  
6.98  
6.92  
6.73  
6.69  
6.69  
6.66  
6.61  
6.47  
6.04  
5.90  
5.85  
5.67  
5.60  
5.54  
5.50  
5.47  
5.46

3.32 MeOD  
3.32 MeOD  
3.31 Methanol-d4  
3.30 MeOD  
3.30 MeOD

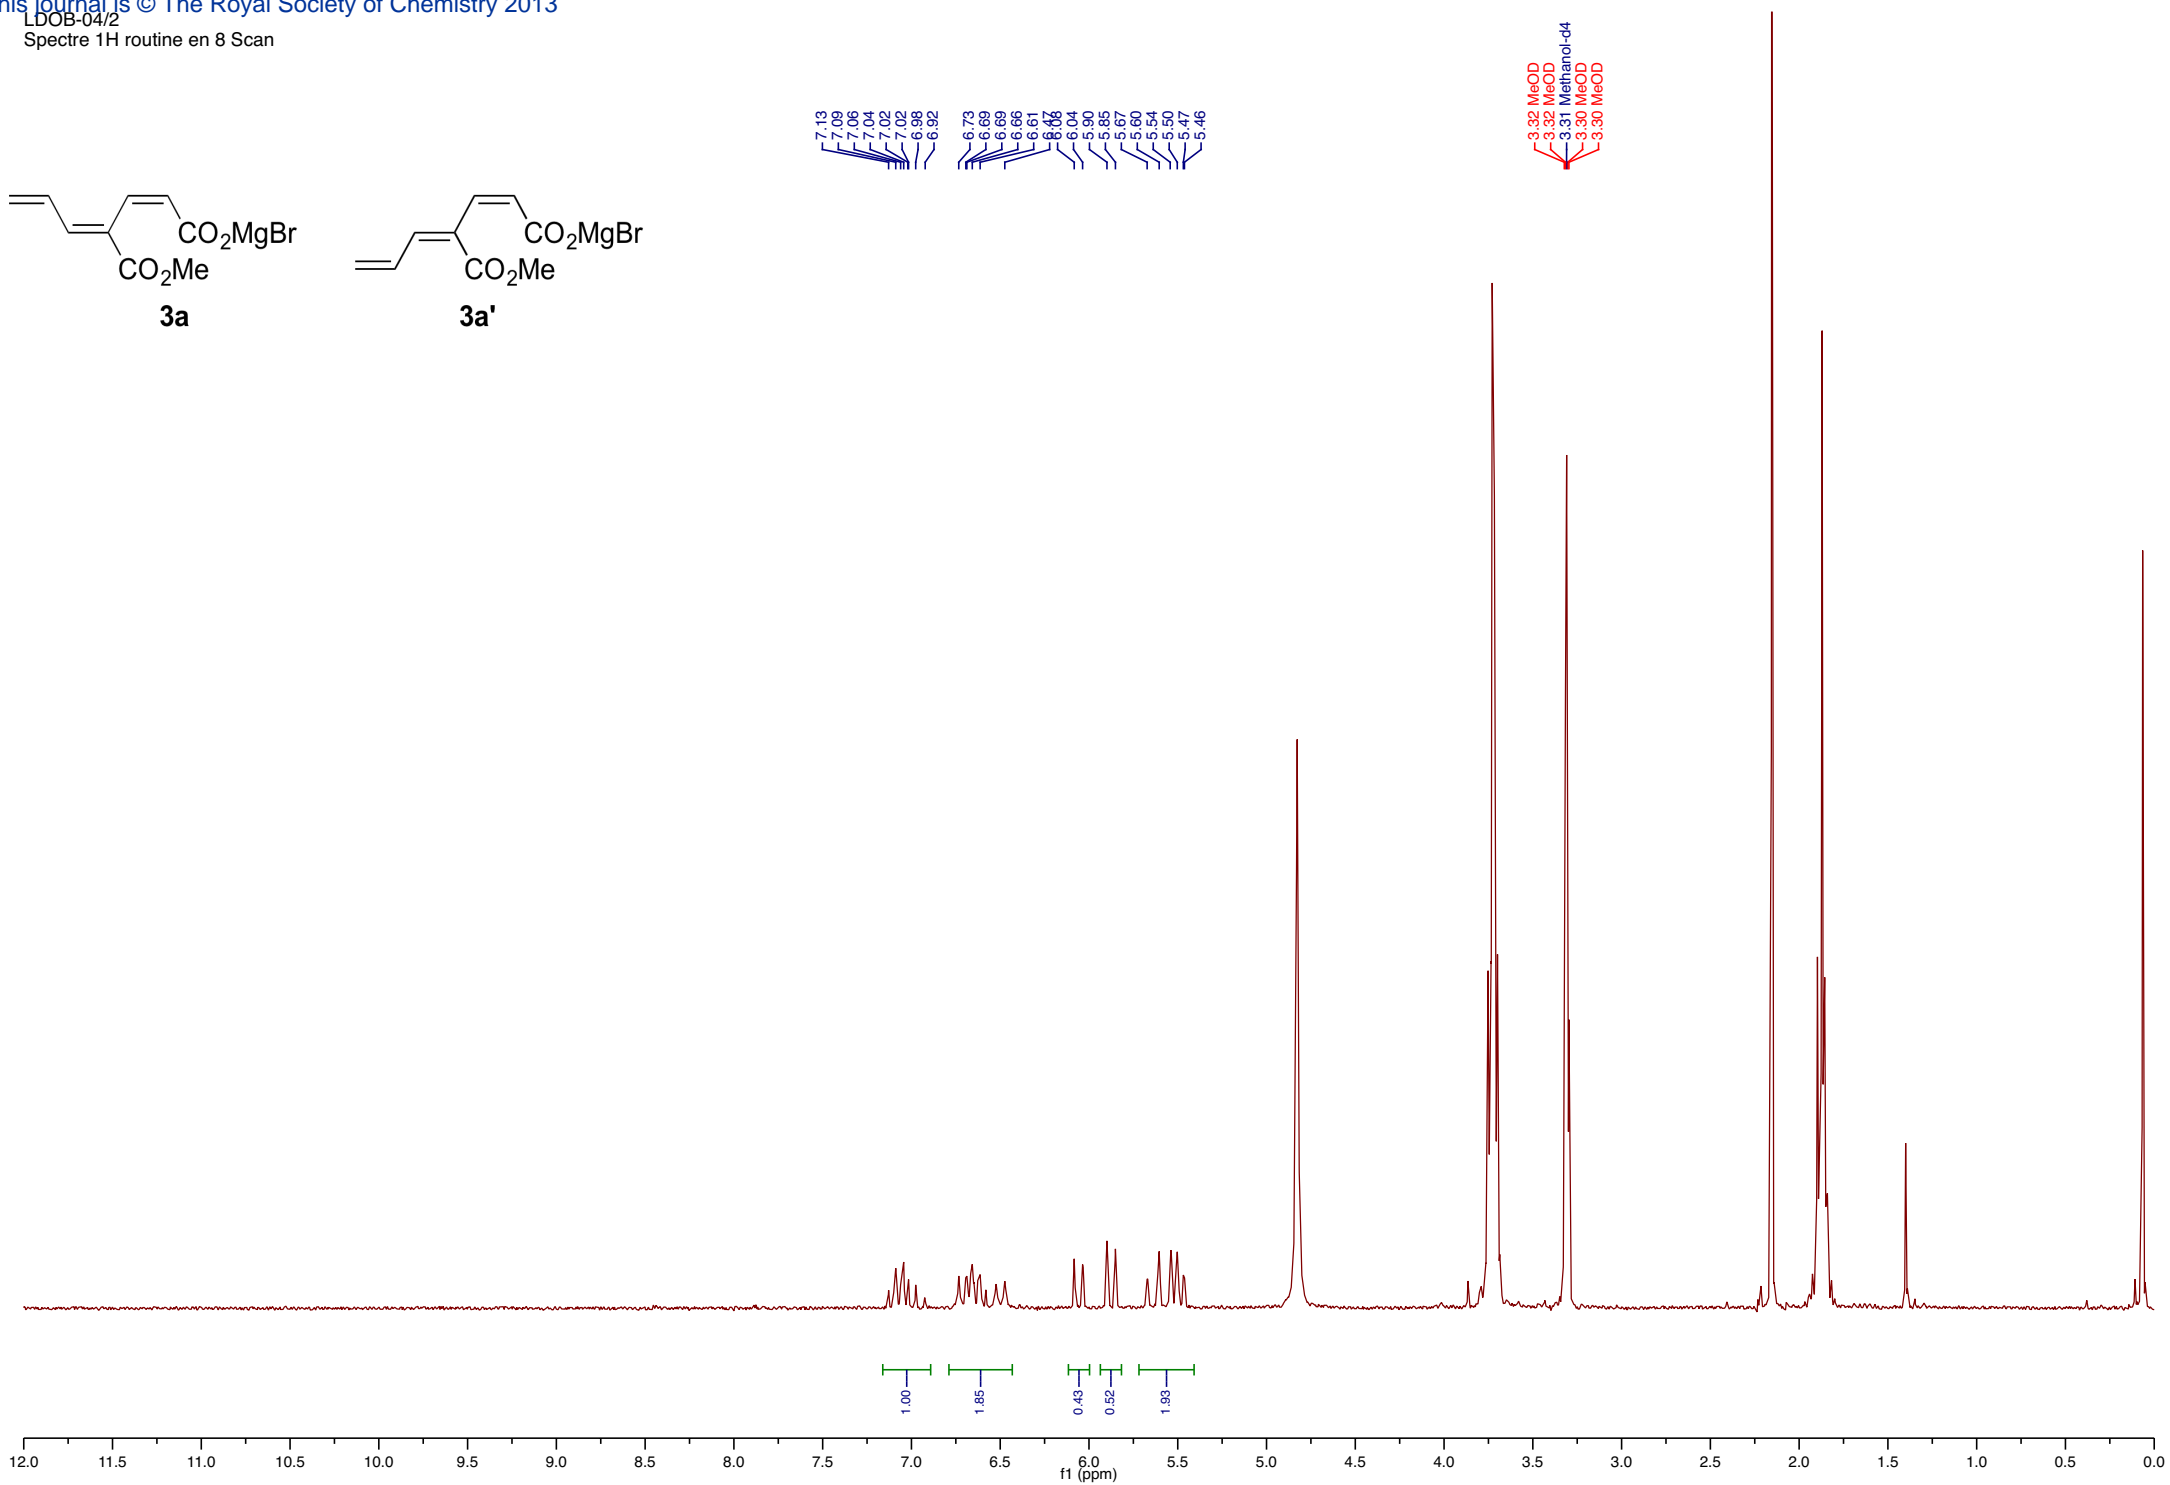

LDOB-16-25j/1  
Spectre 1H routine en 8 Scan  
Sel dans MeOD

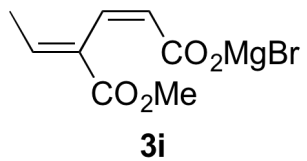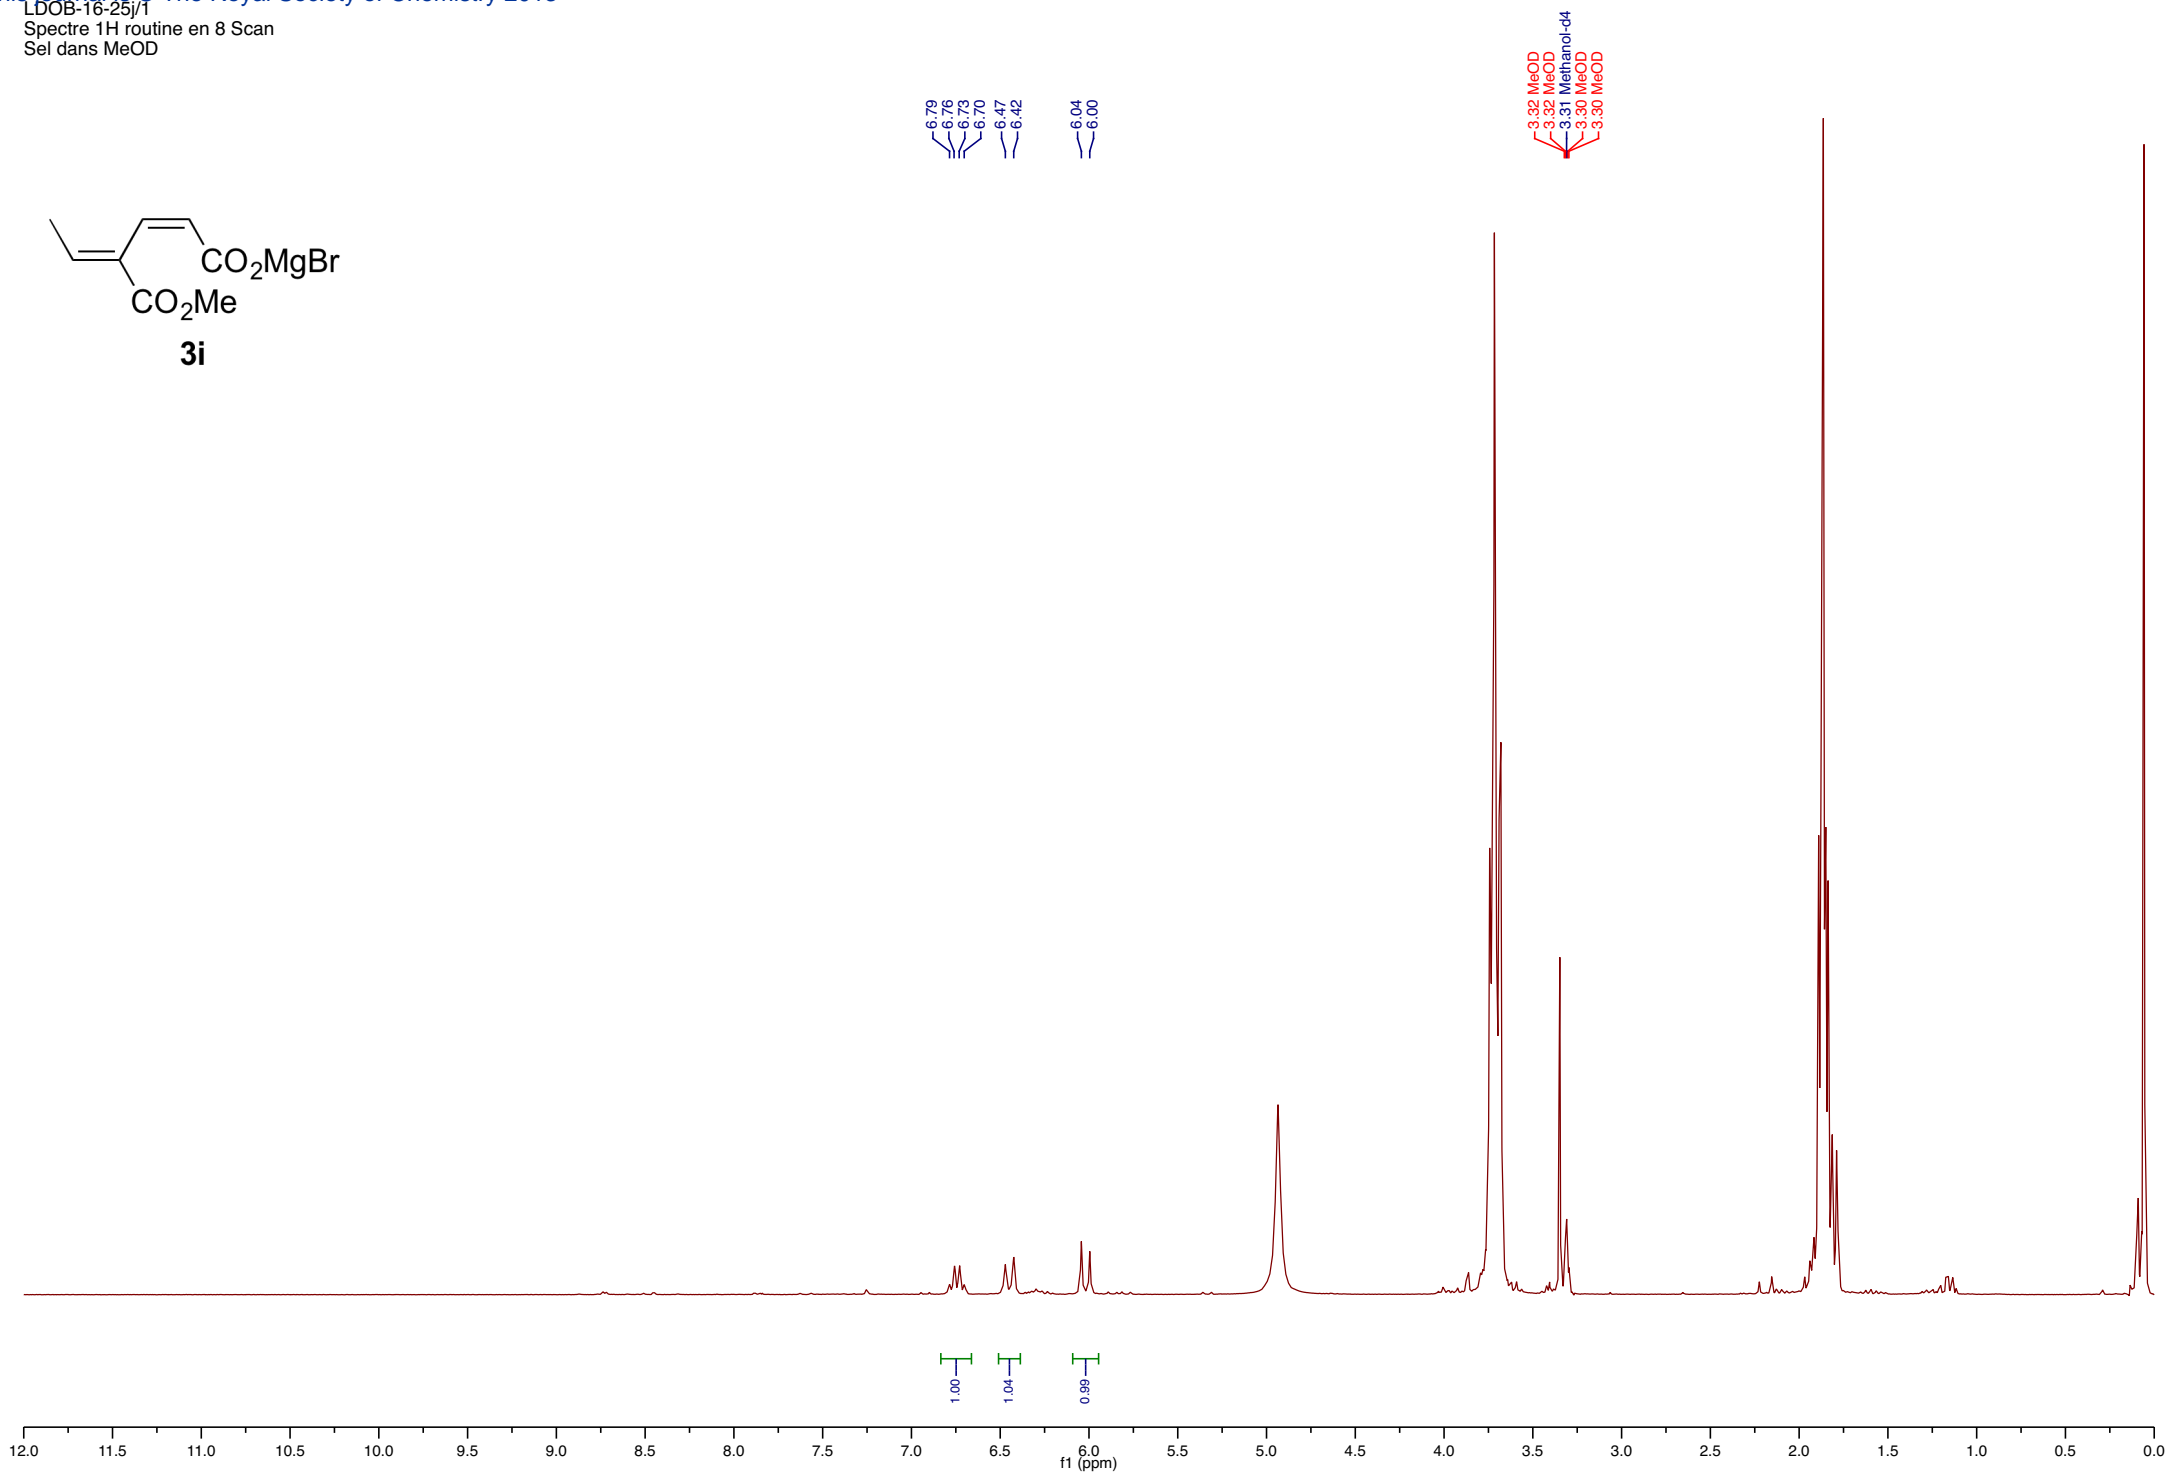

LDOB-29/1  
Spectre 1H routine en 8 Scan

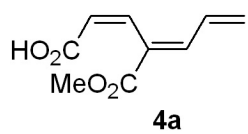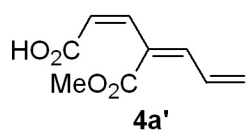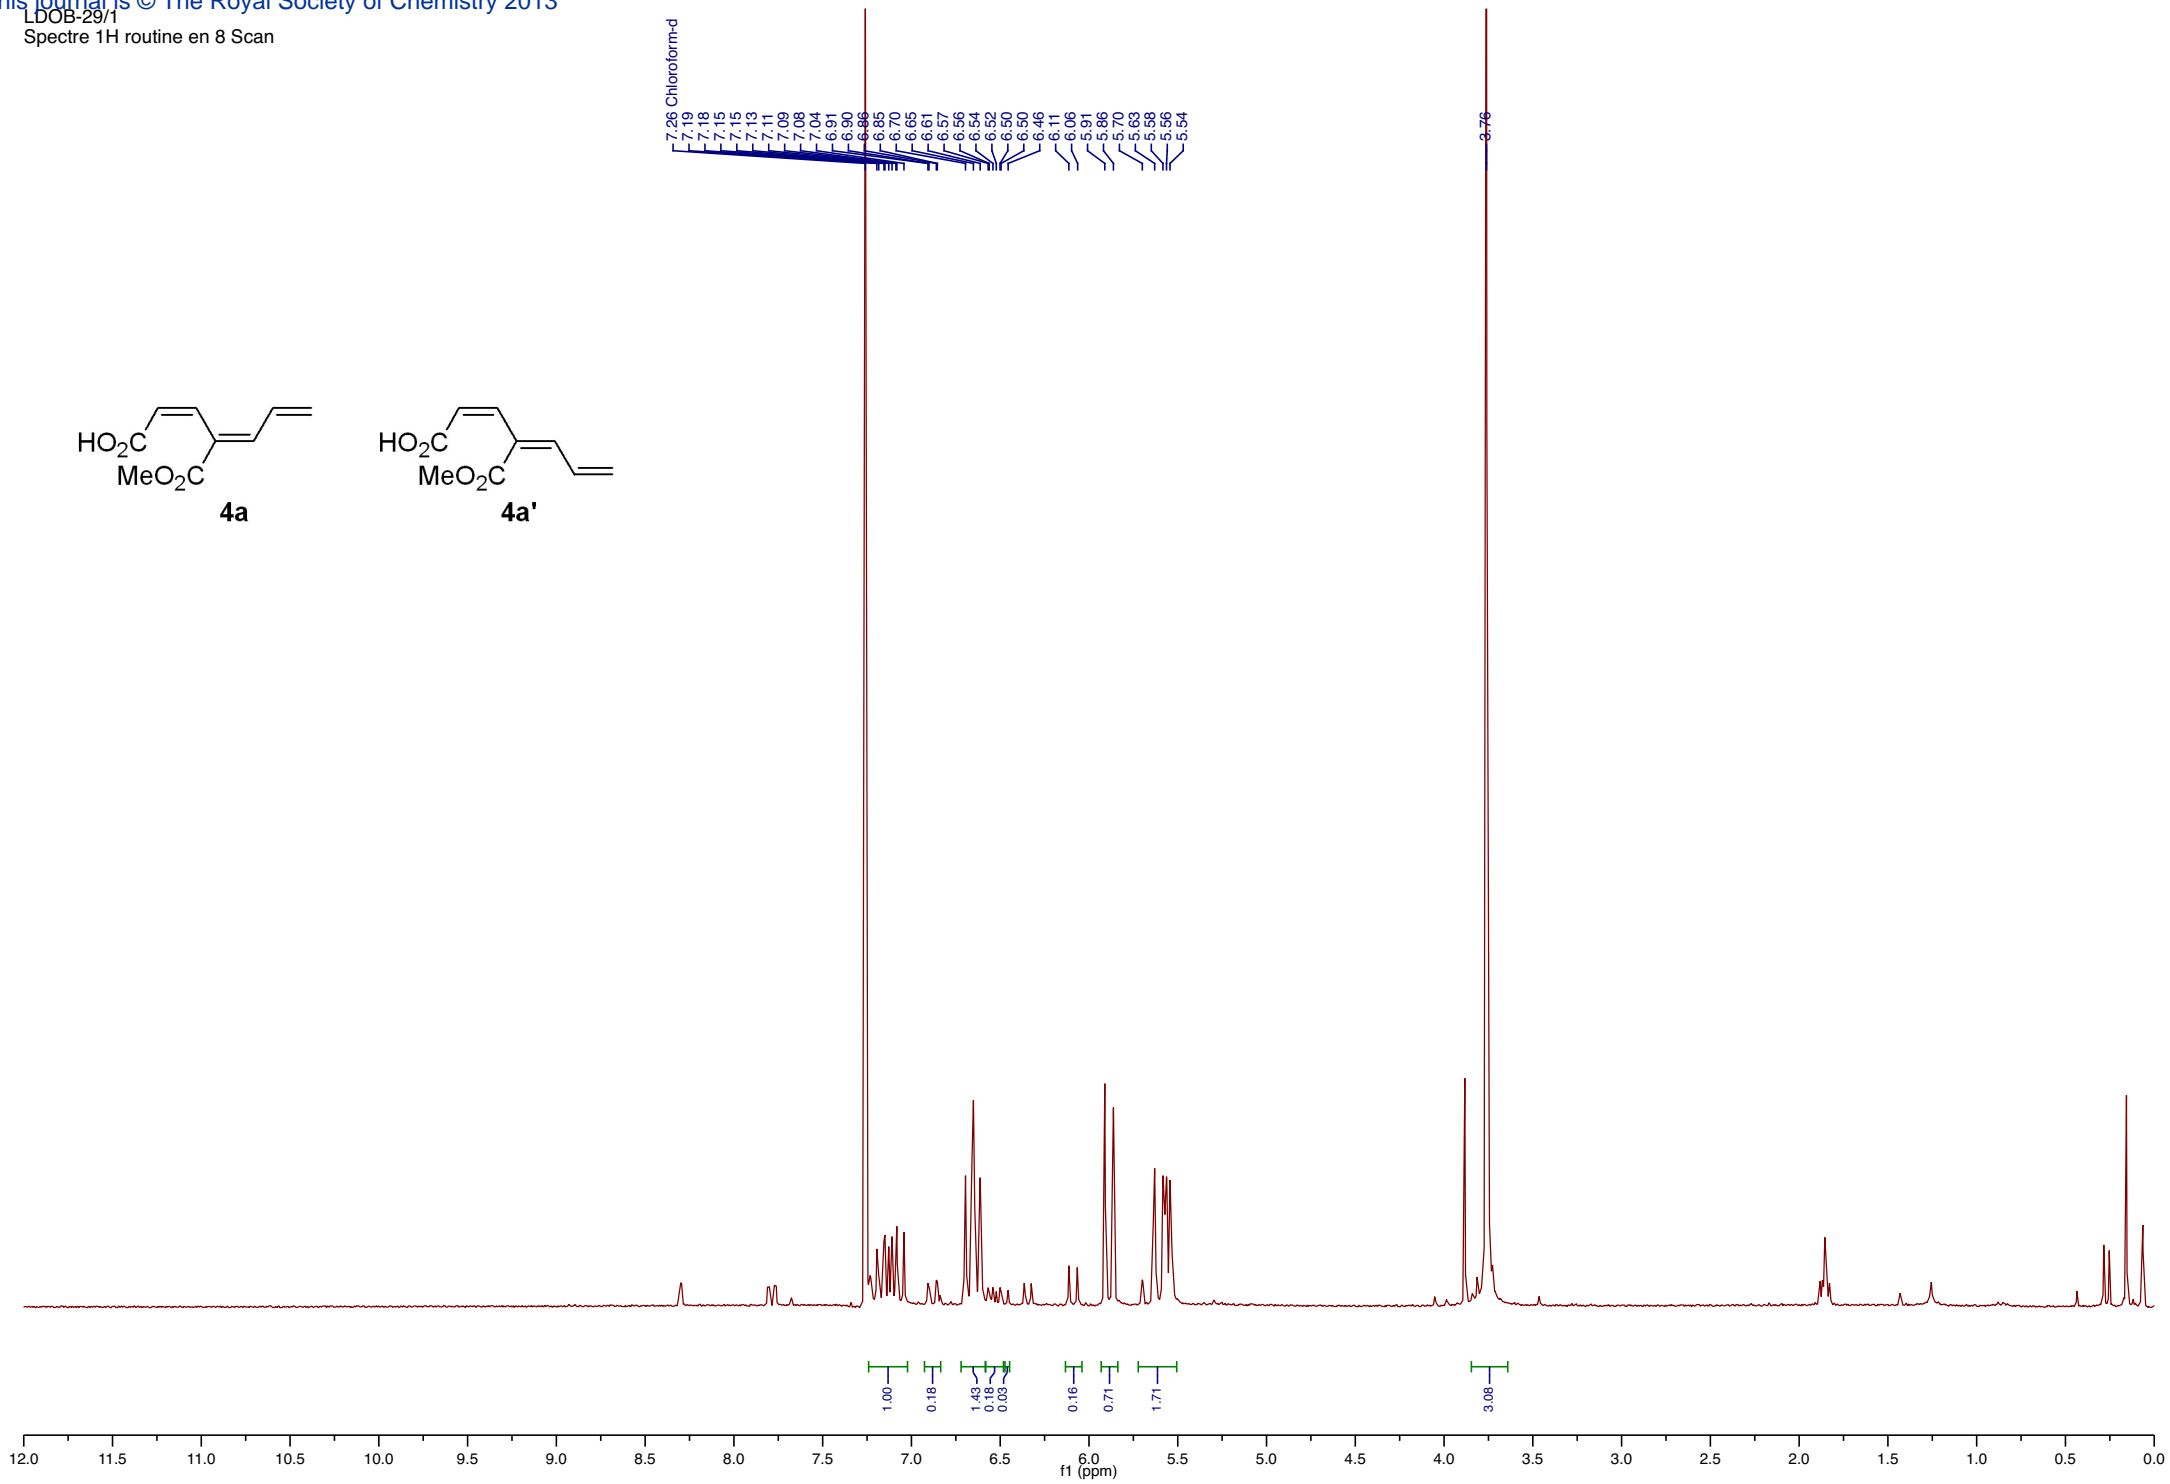

170.72  
170.30  
166.66  
166.06

144.67  
142.73  
141.09  
136.72

132.96  
131.86  
129.10  
127.28  
127.13  
123.60  
119.72

77.58 CDCl<sub>3</sub>  
77.16 Chloroform-d  
76.74 CDCl<sub>3</sub>

52.21  
51.61

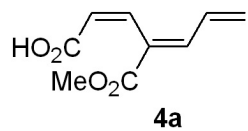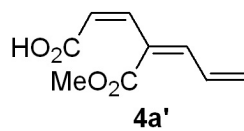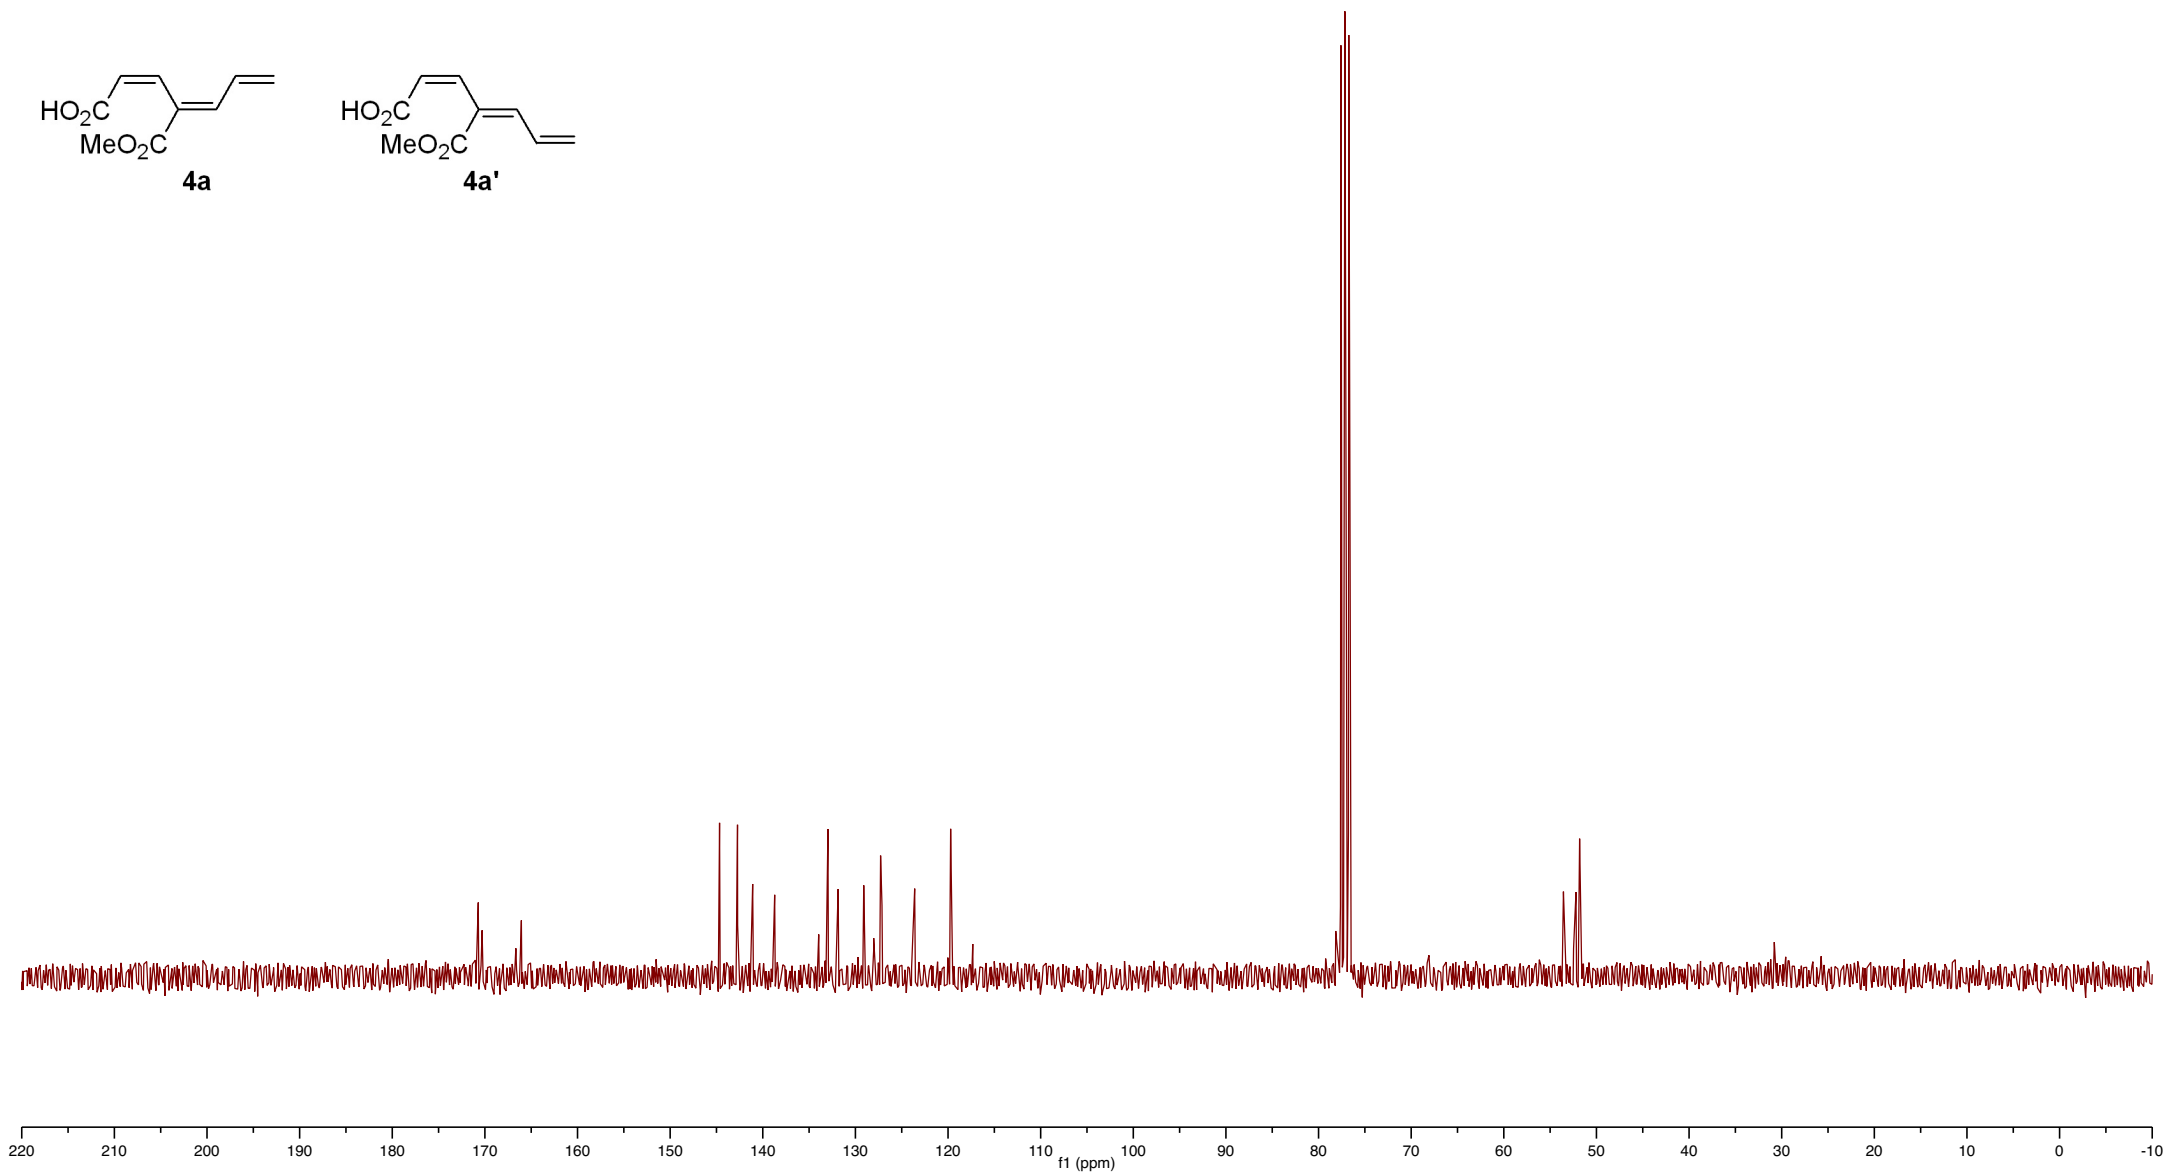

JA-56/1

<sup>1</sup>H routine 8 scans

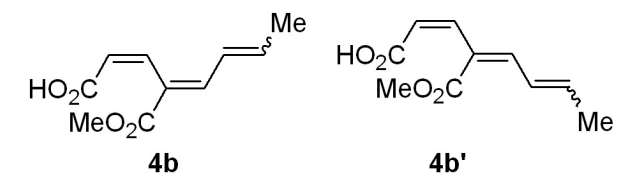

9.84

7.56  
7.54  
7.26 Chloroform-d  
7.08  
7.04  
6.91  
6.87  
6.73  
6.69  
6.68  
6.66  
6.64  
6.62  
6.61  
6.29  
6.28  
6.26  
6.25  
6.25  
6.24  
6.23  
6.22  
6.20  
6.18  
6.15  
6.13  
6.10  
6.08  
6.07  
6.04  
6.04  
6.03  
6.01  
5.99  
5.96  
5.97  
5.84  
5.83  
5.80

3.75  
3.73

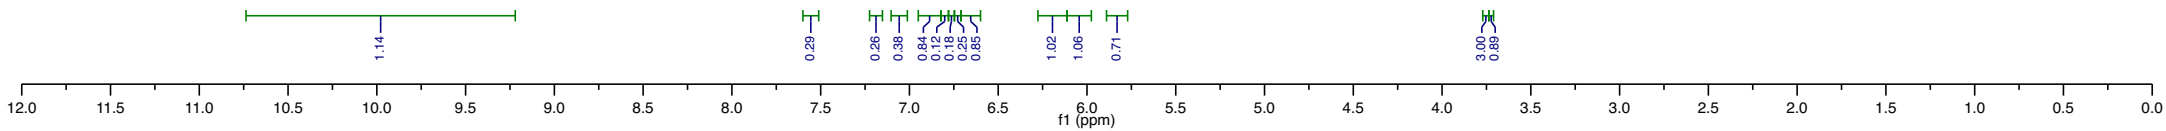

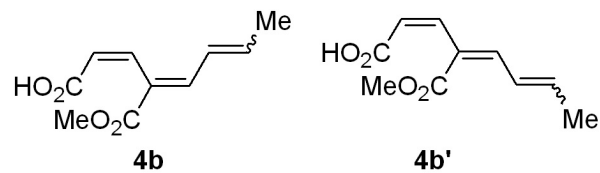

145.21  
143.04  
142.00  
142.00  
141.54  
141.39  
138.72  
138.59  
137.42  
135.29  
128.17  
126.97  
125.30  
124.30  
123.26  
122.83  
118.69  
118.42

51.95  
51.88  
51.56  
51.48

19.02  
18.97  
14.07  
13.72

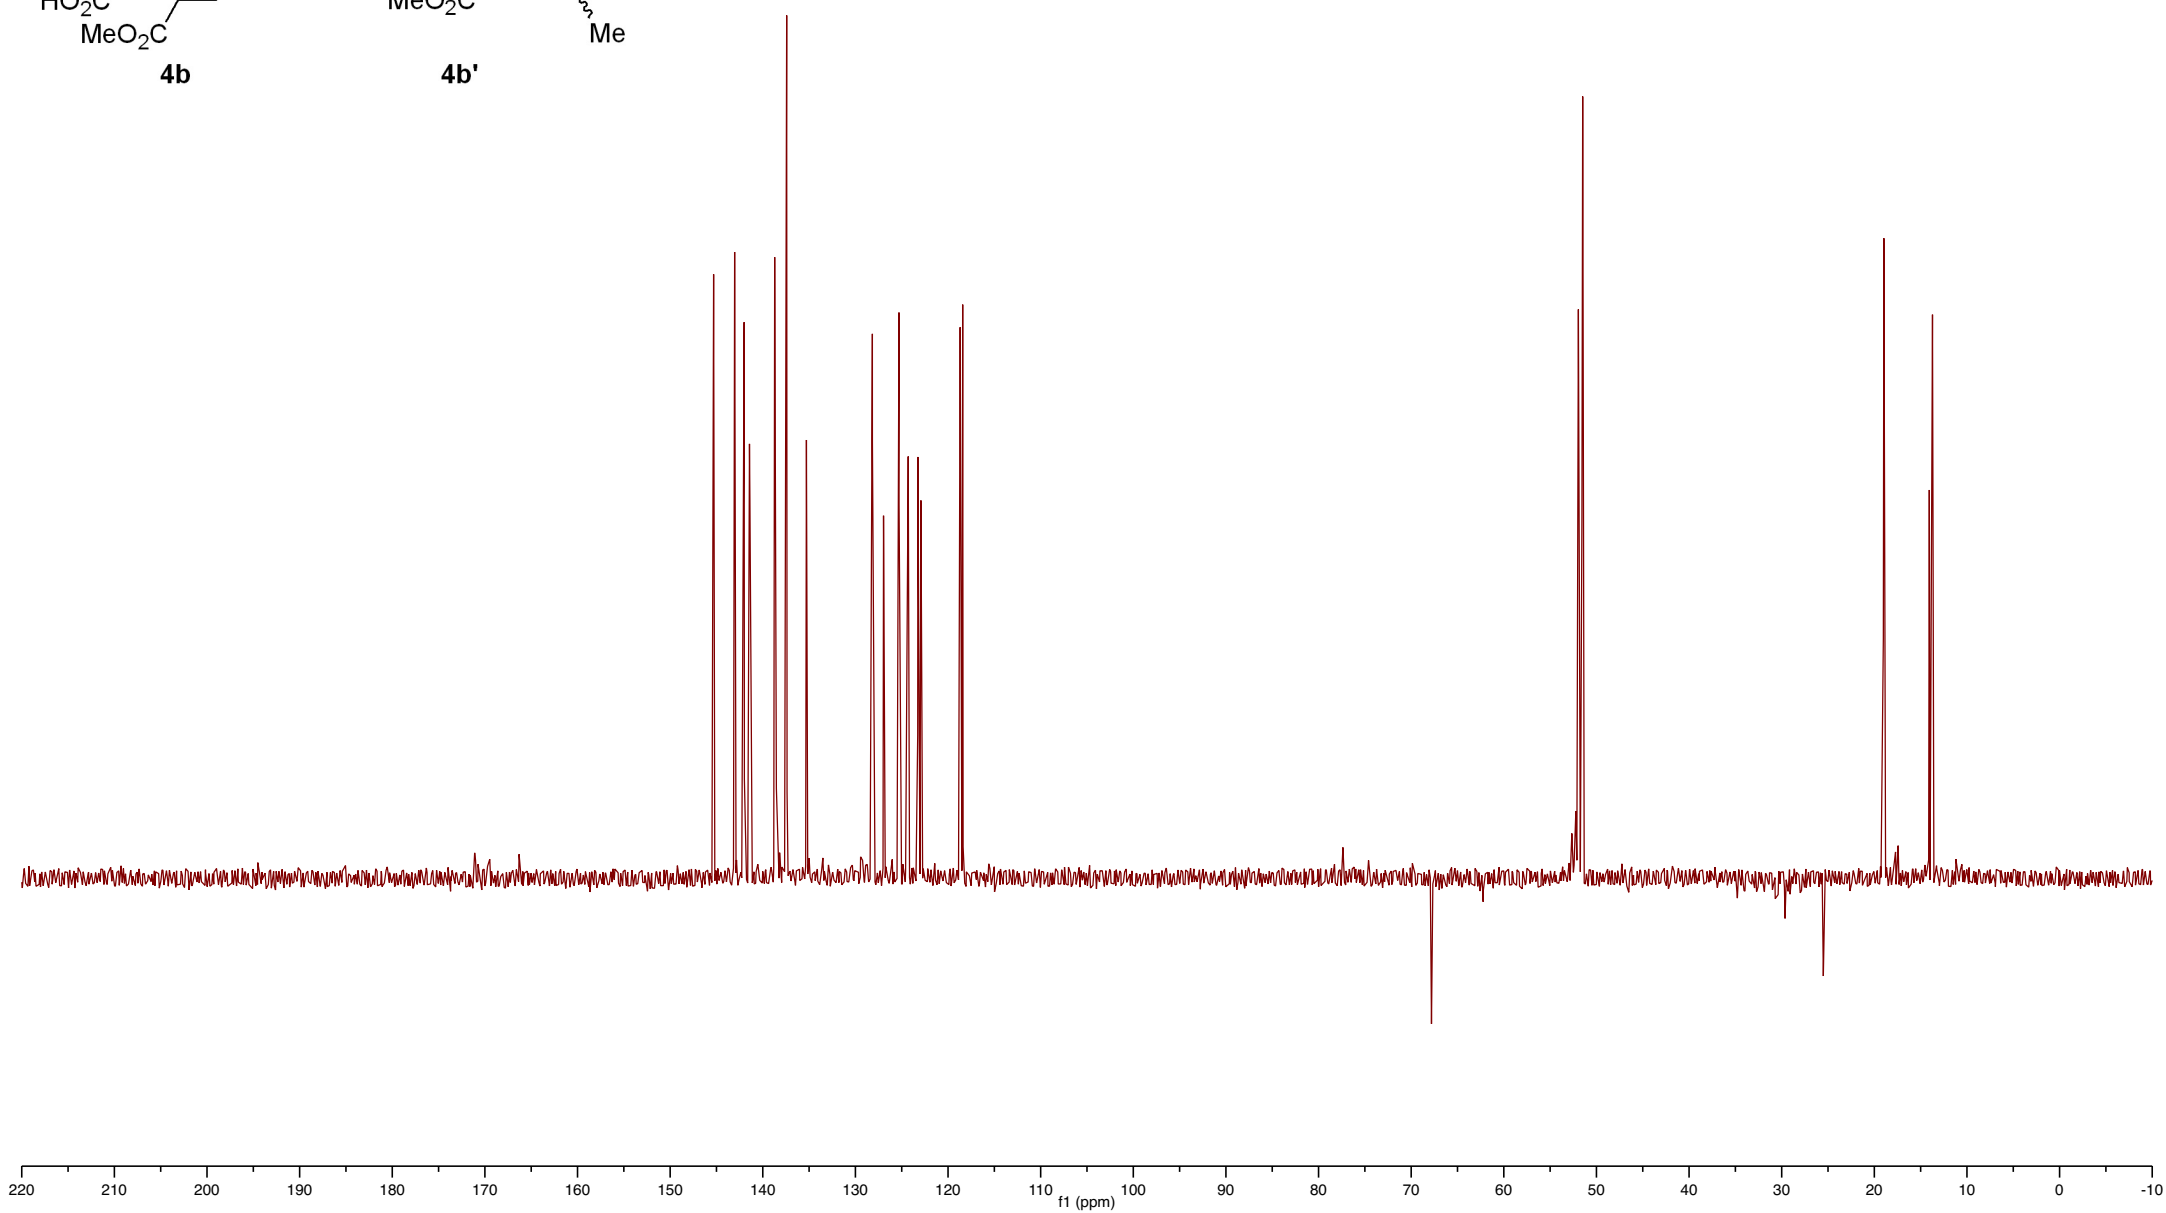



JA-57-400/1  
1H routine  
8 scans

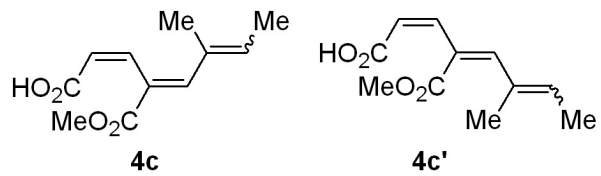

10.76

7.29 Chloroform-d  
7.26  
7.12  
6.91  
6.88  
6.88  
6.77  
6.74  
5.98  
5.95  
5.86  
5.84  
5.82  
5.81  
5.69  
5.67  
5.65  
5.63

3.71  
3.69

1.83  
1.79  
1.77  
1.75  
1.60  
1.58

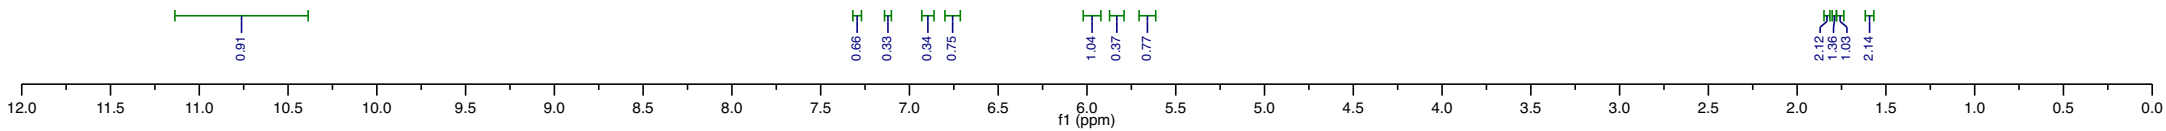

JA-57-400/3  
13C routine  
decouple 1H  
32 scans

171.39  
171.20  
167.63  
167.15

145.87  
140.91  
140.86  
140.72  
136.19  
133.17  
131.89  
131.63  
128.15  
125.49  
122.12  
121.95

77.48 CDCl<sub>3</sub>  
77.16 Chloroform-d  
76.84 CDCl<sub>3</sub>

52.13  
51.95

23.13

16.15  
15.25  
14.68

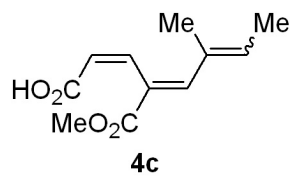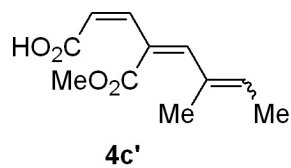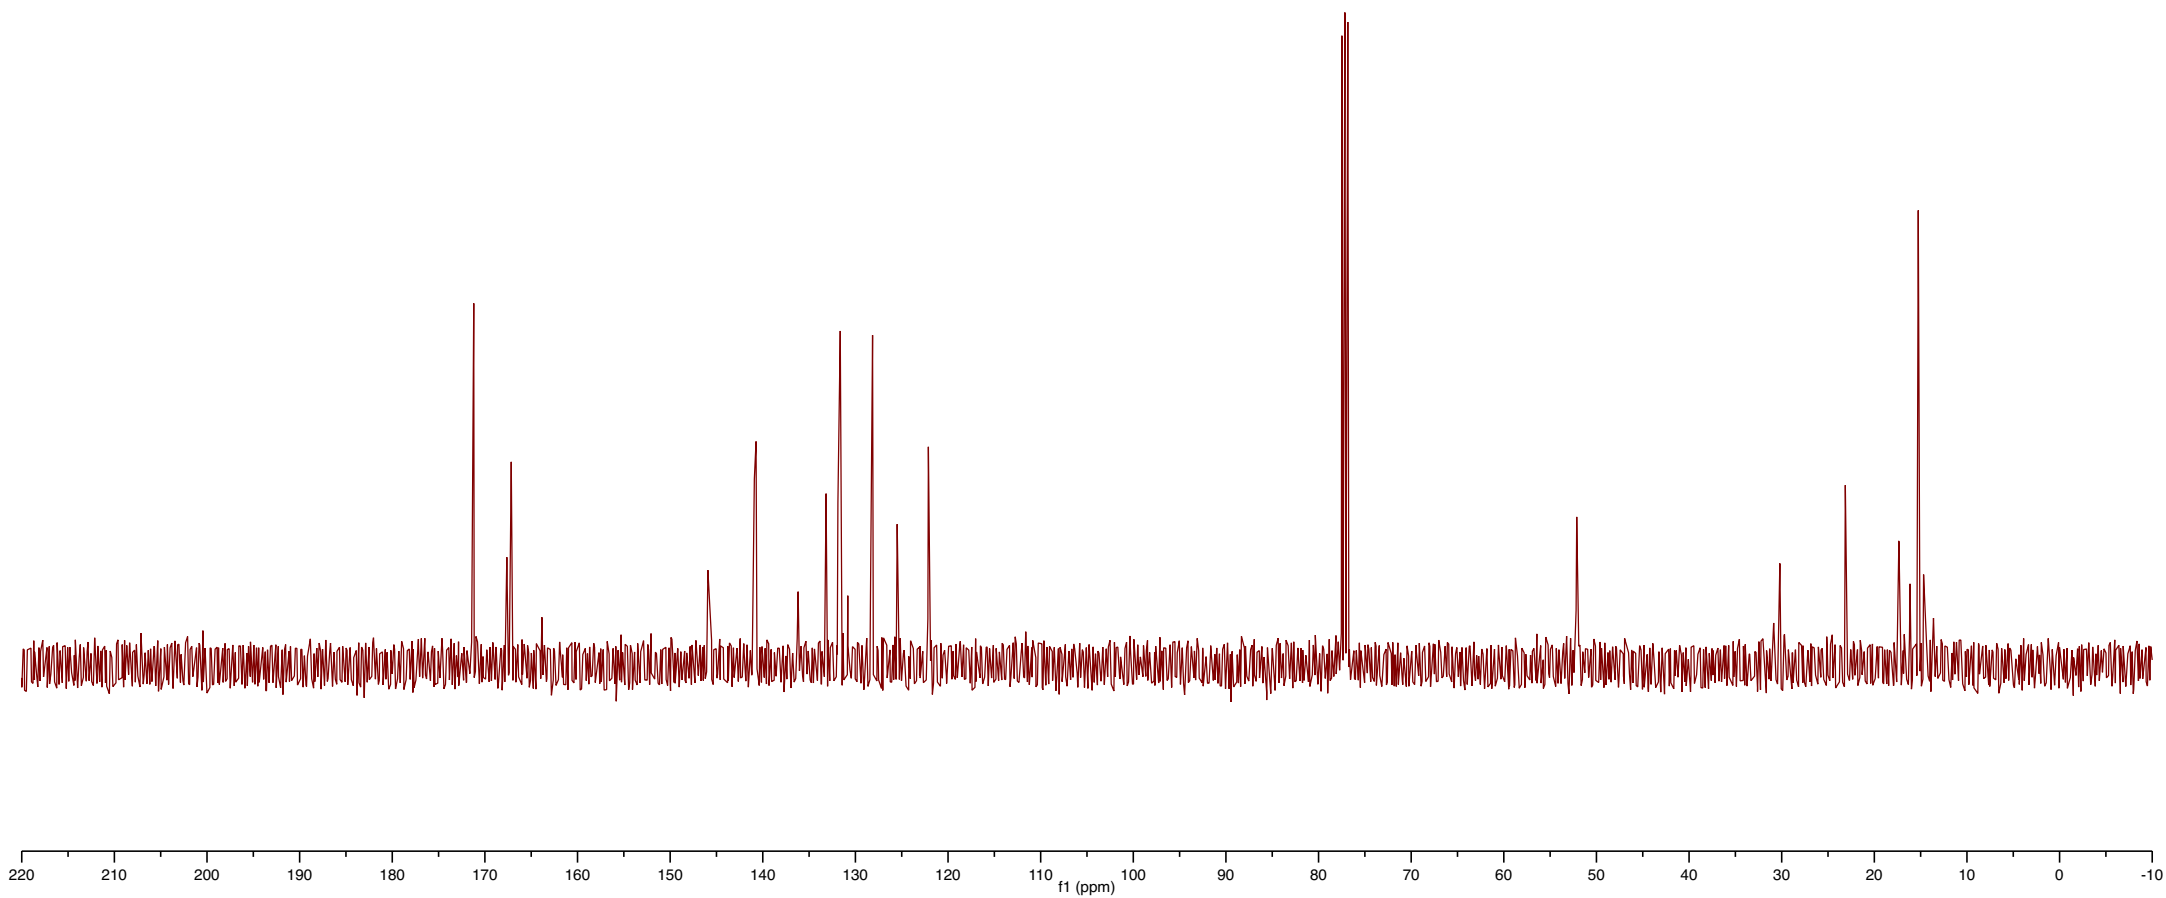

JA-45A/1

<sup>1</sup>H routine 8 scans

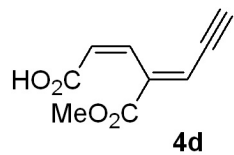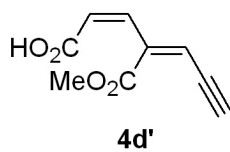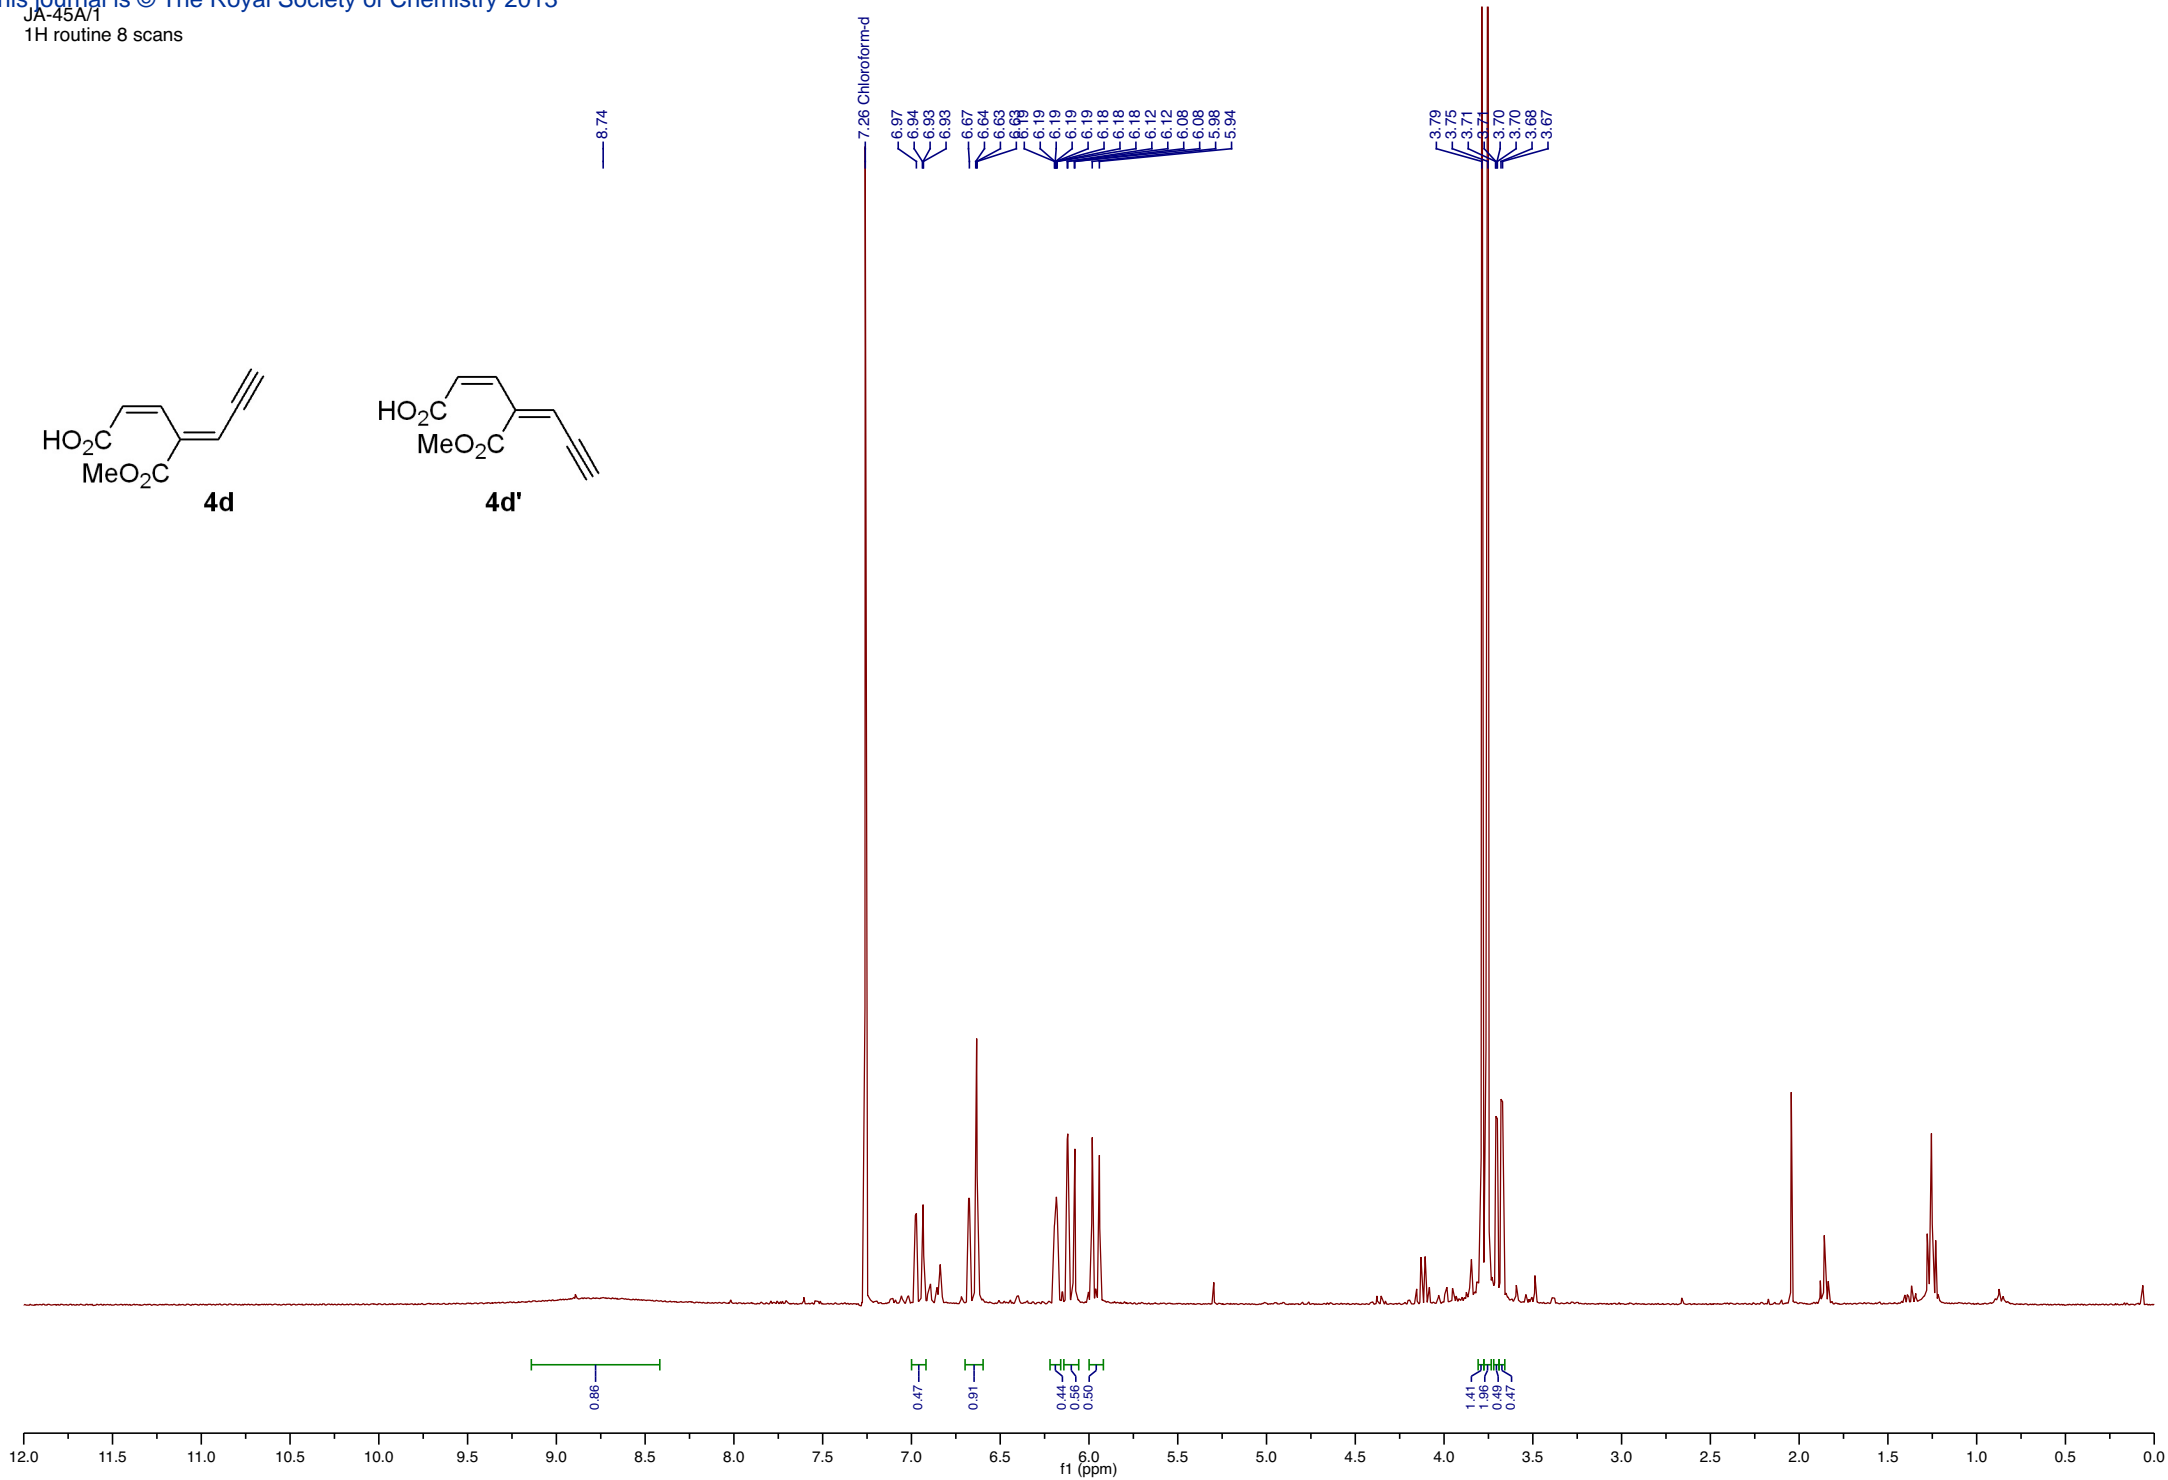

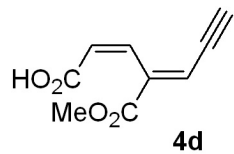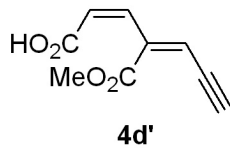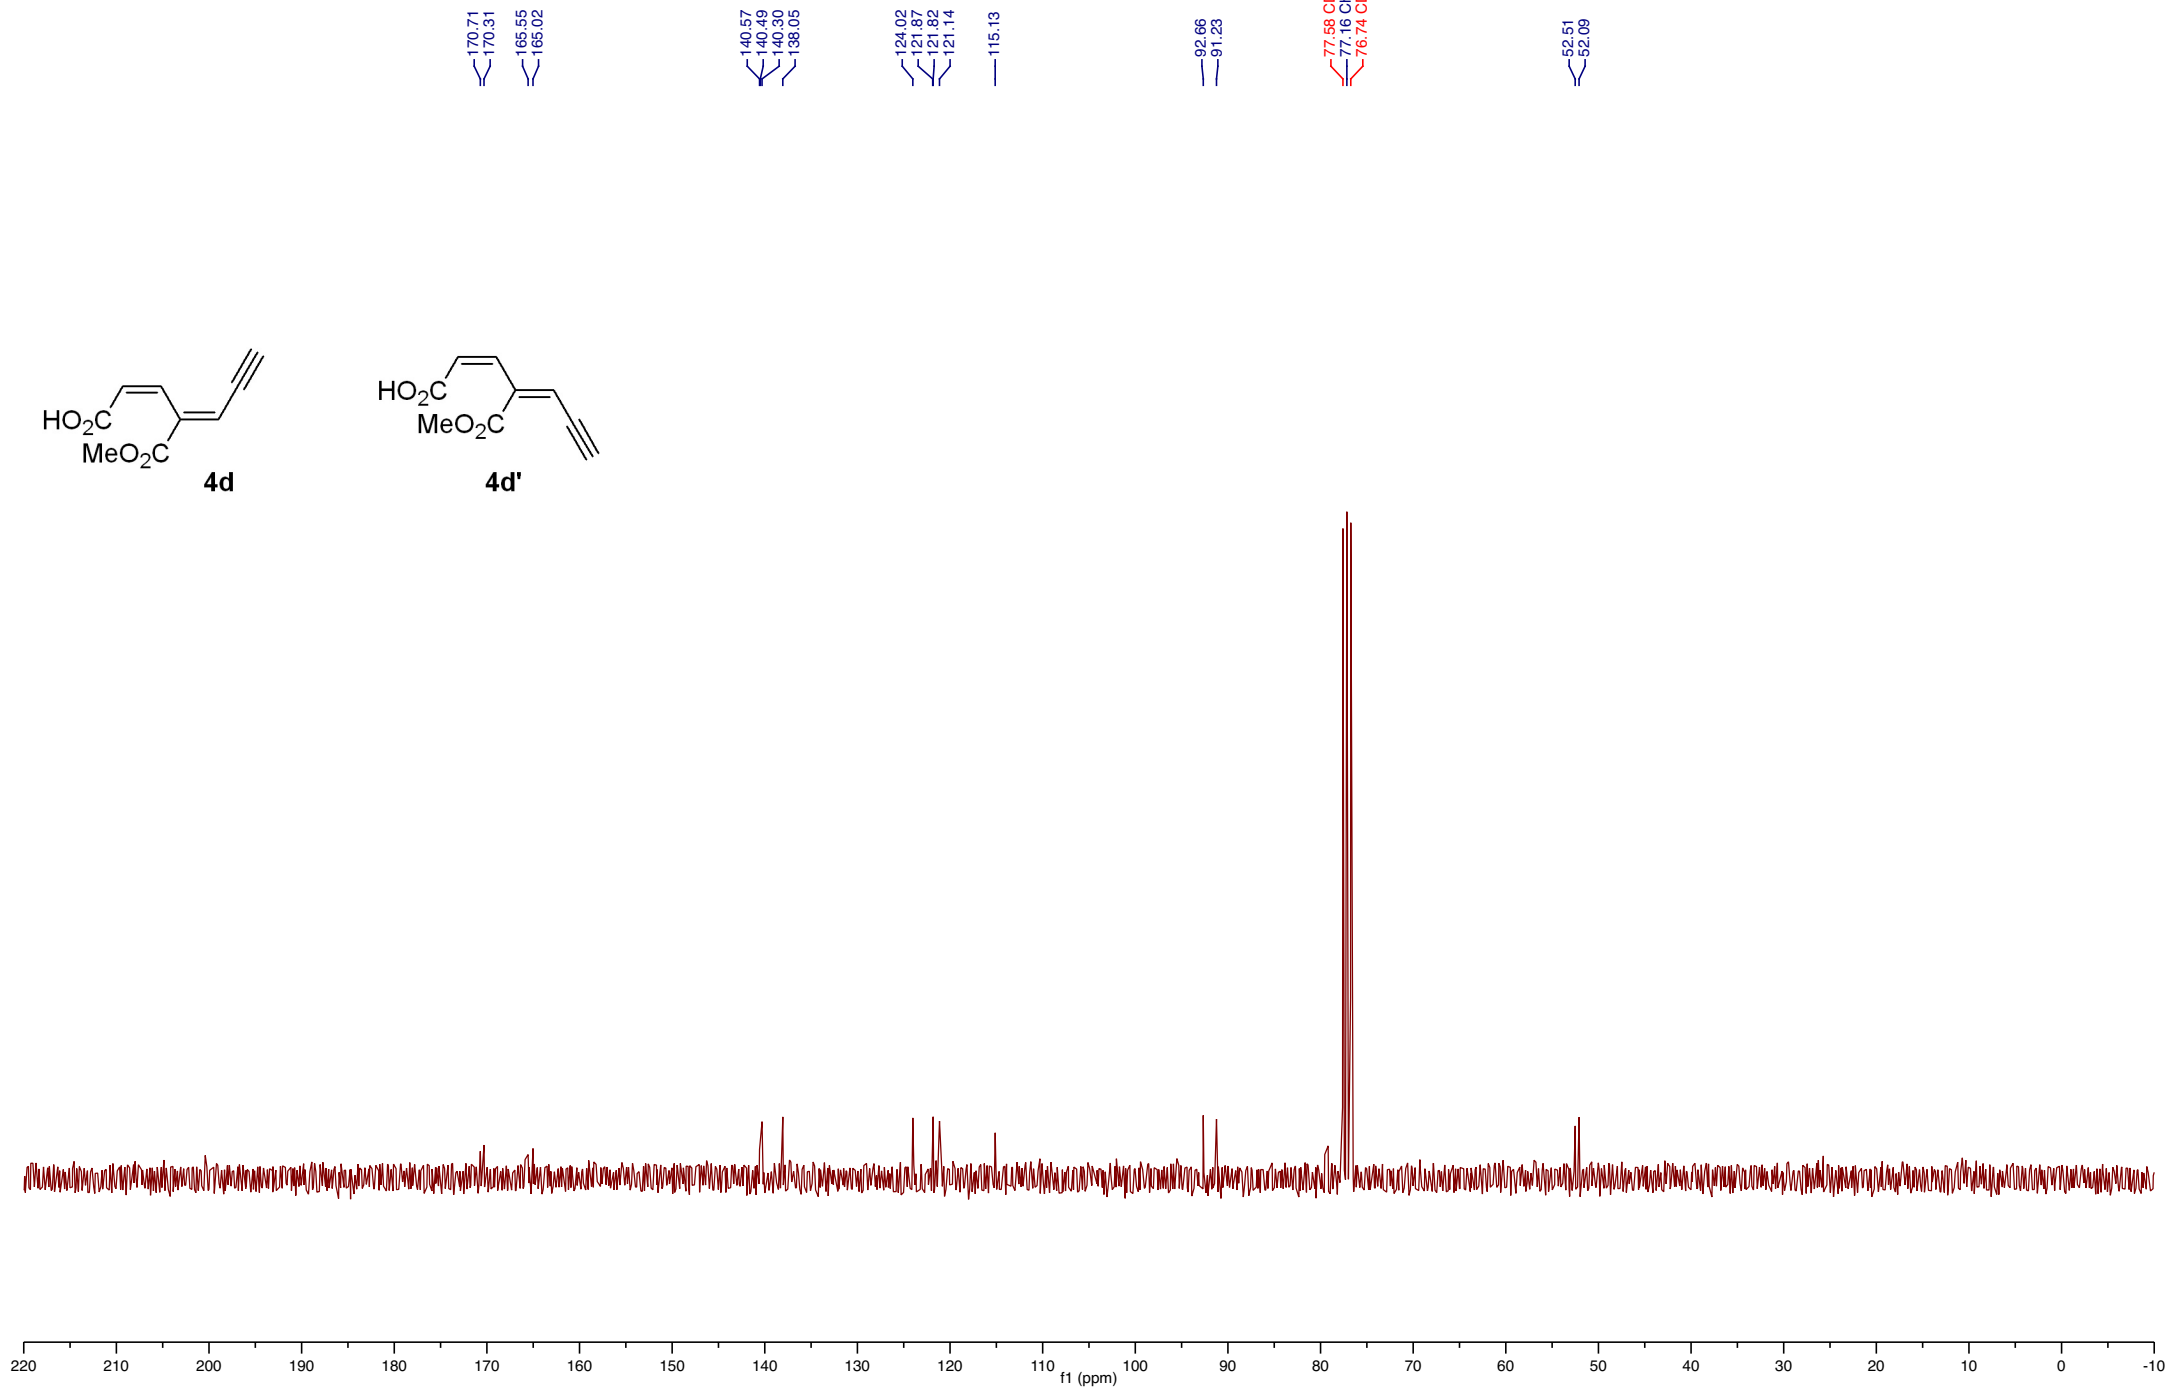

JA-62-400/1  
1H routine  
8 scans

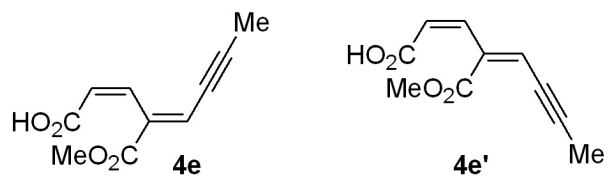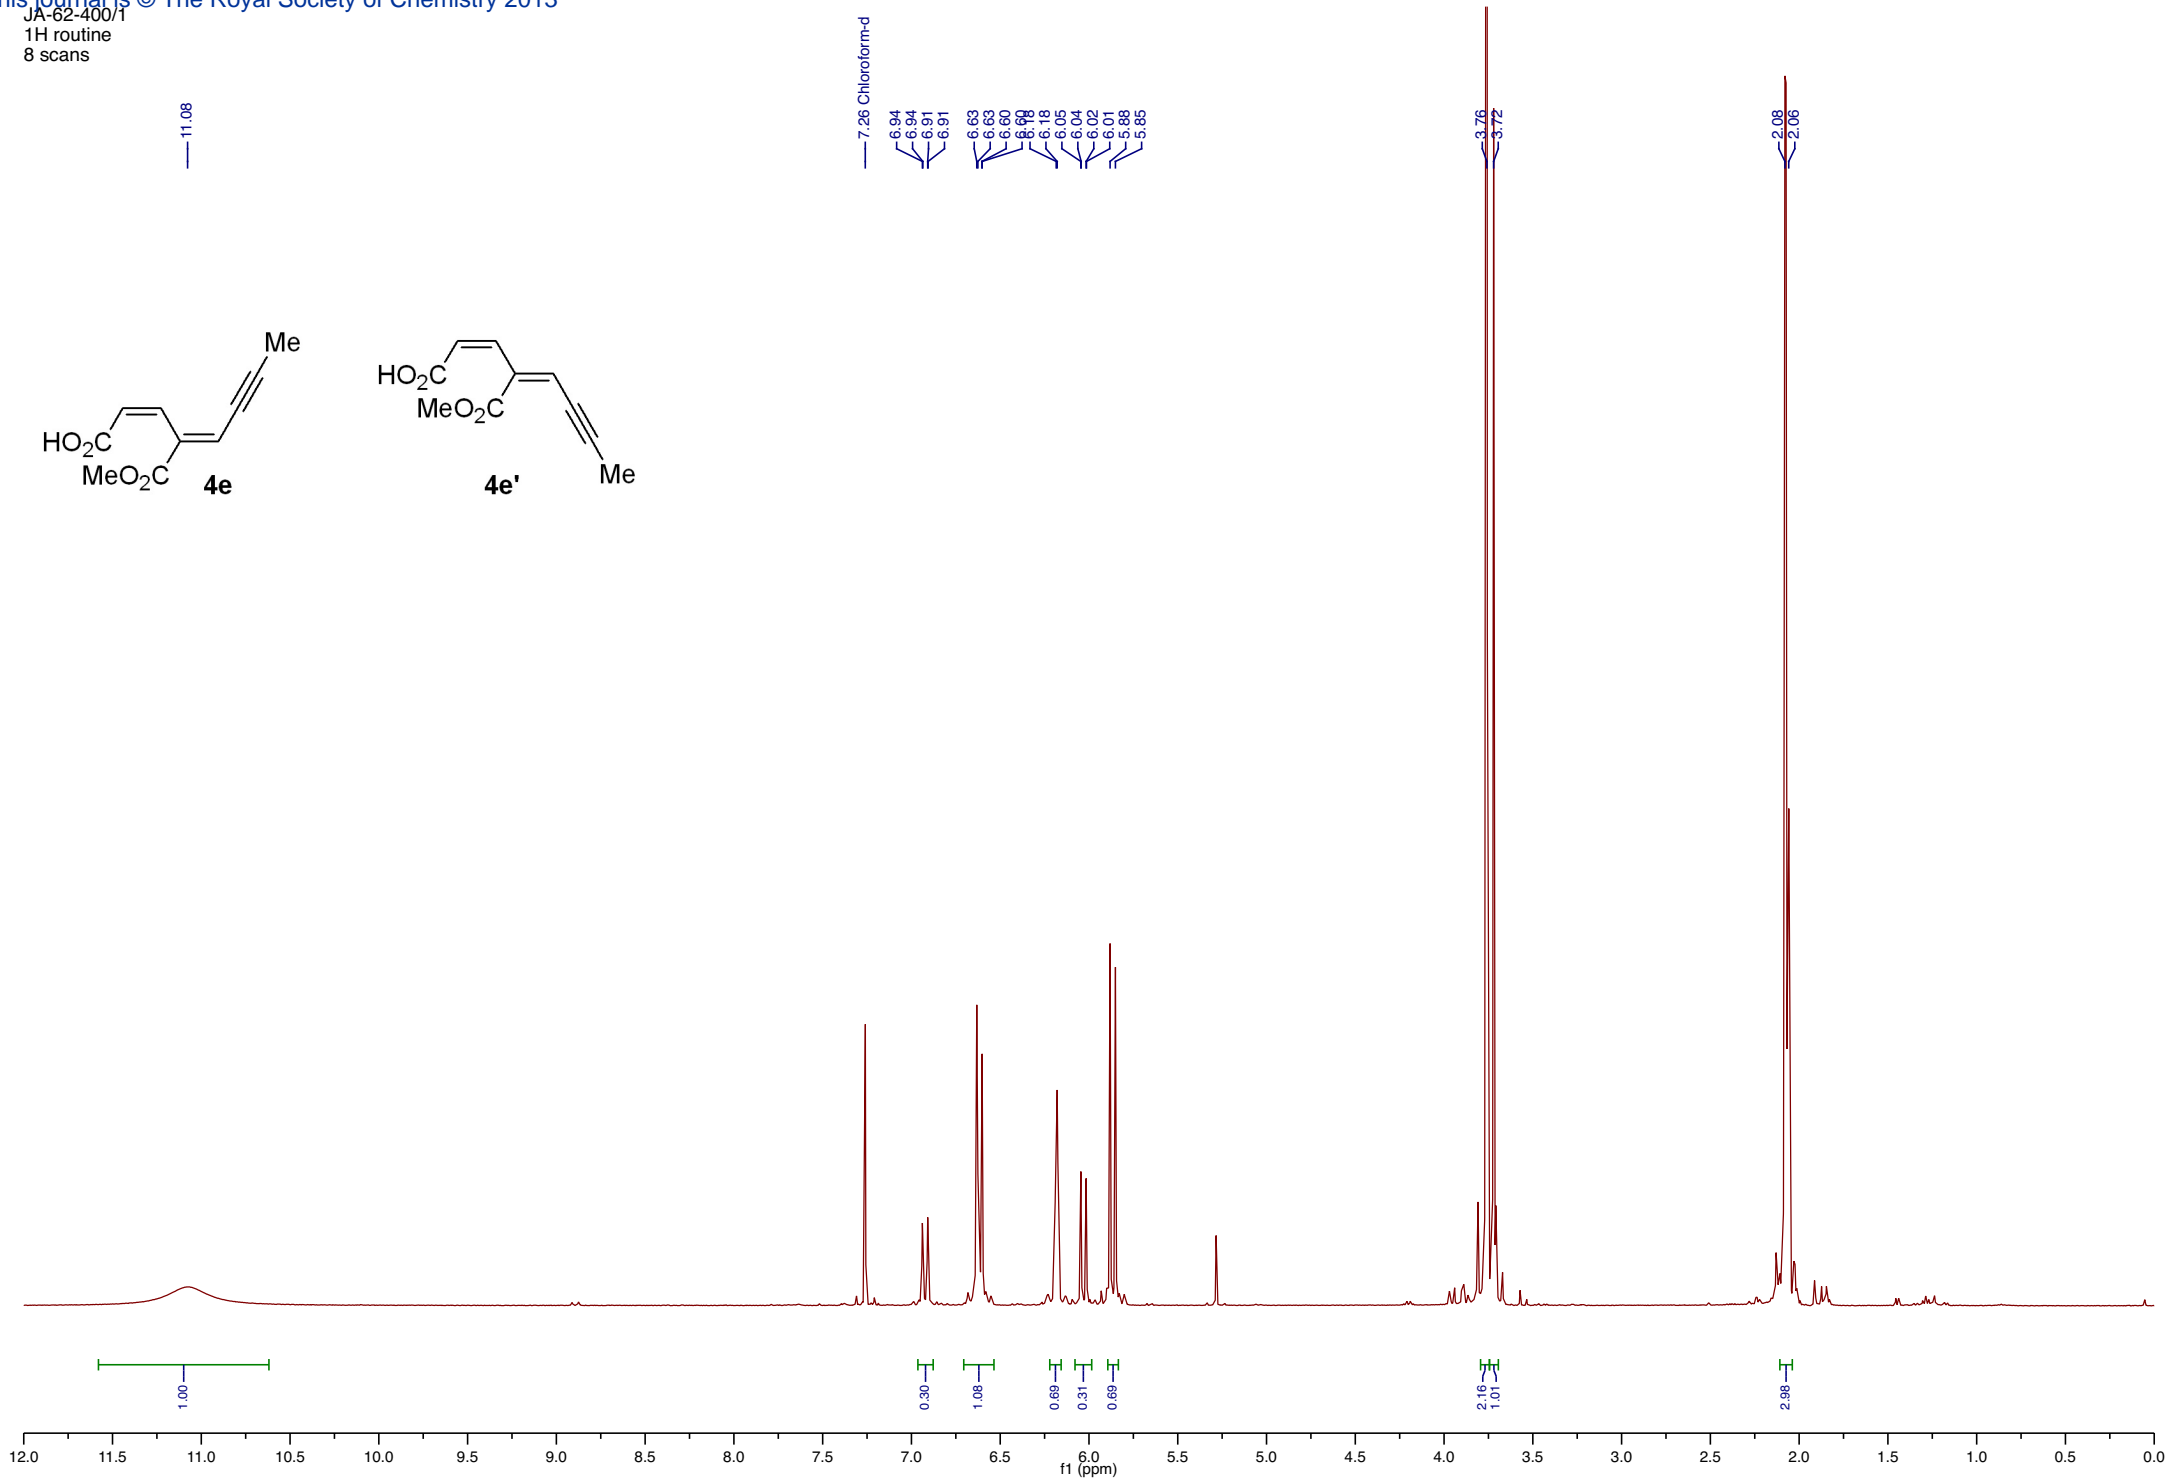

JA-62-400/2  
13C routine  
decouple 1H  
32 scans

171.39  
170.90  
166.09  
165.49

141.11  
138.36  
137.75  
137.38

124.52  
123.68  
123.09  
120.34

103.87  
102.51

77.48 CDCl<sub>3</sub>  
77.16 Chloroform-d  
76.84 CDCl<sub>3</sub>

52.27  
51.85

5.36  
5.17

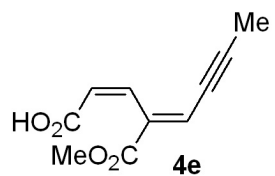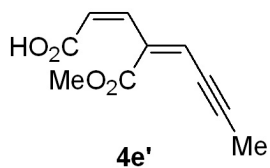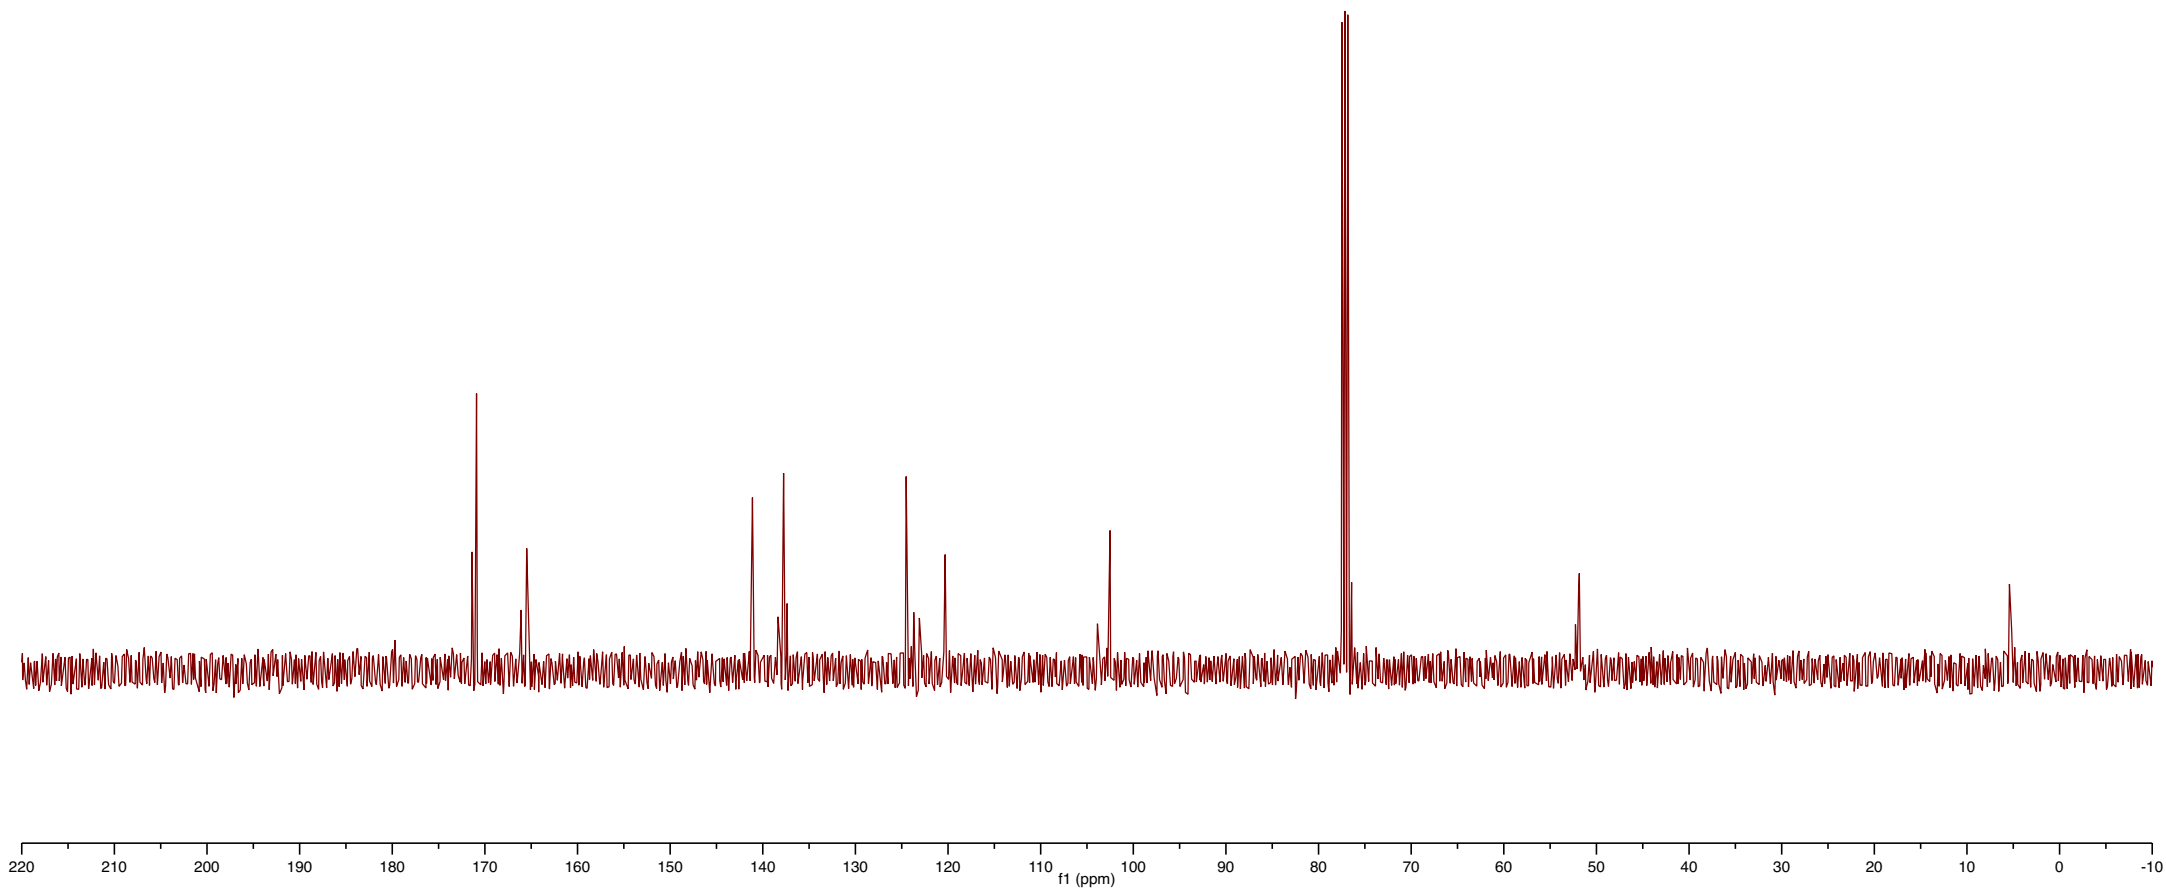

JA-50-400/1  
1H routine  
8 scans

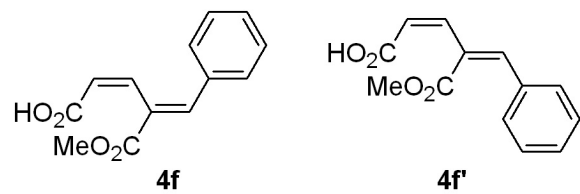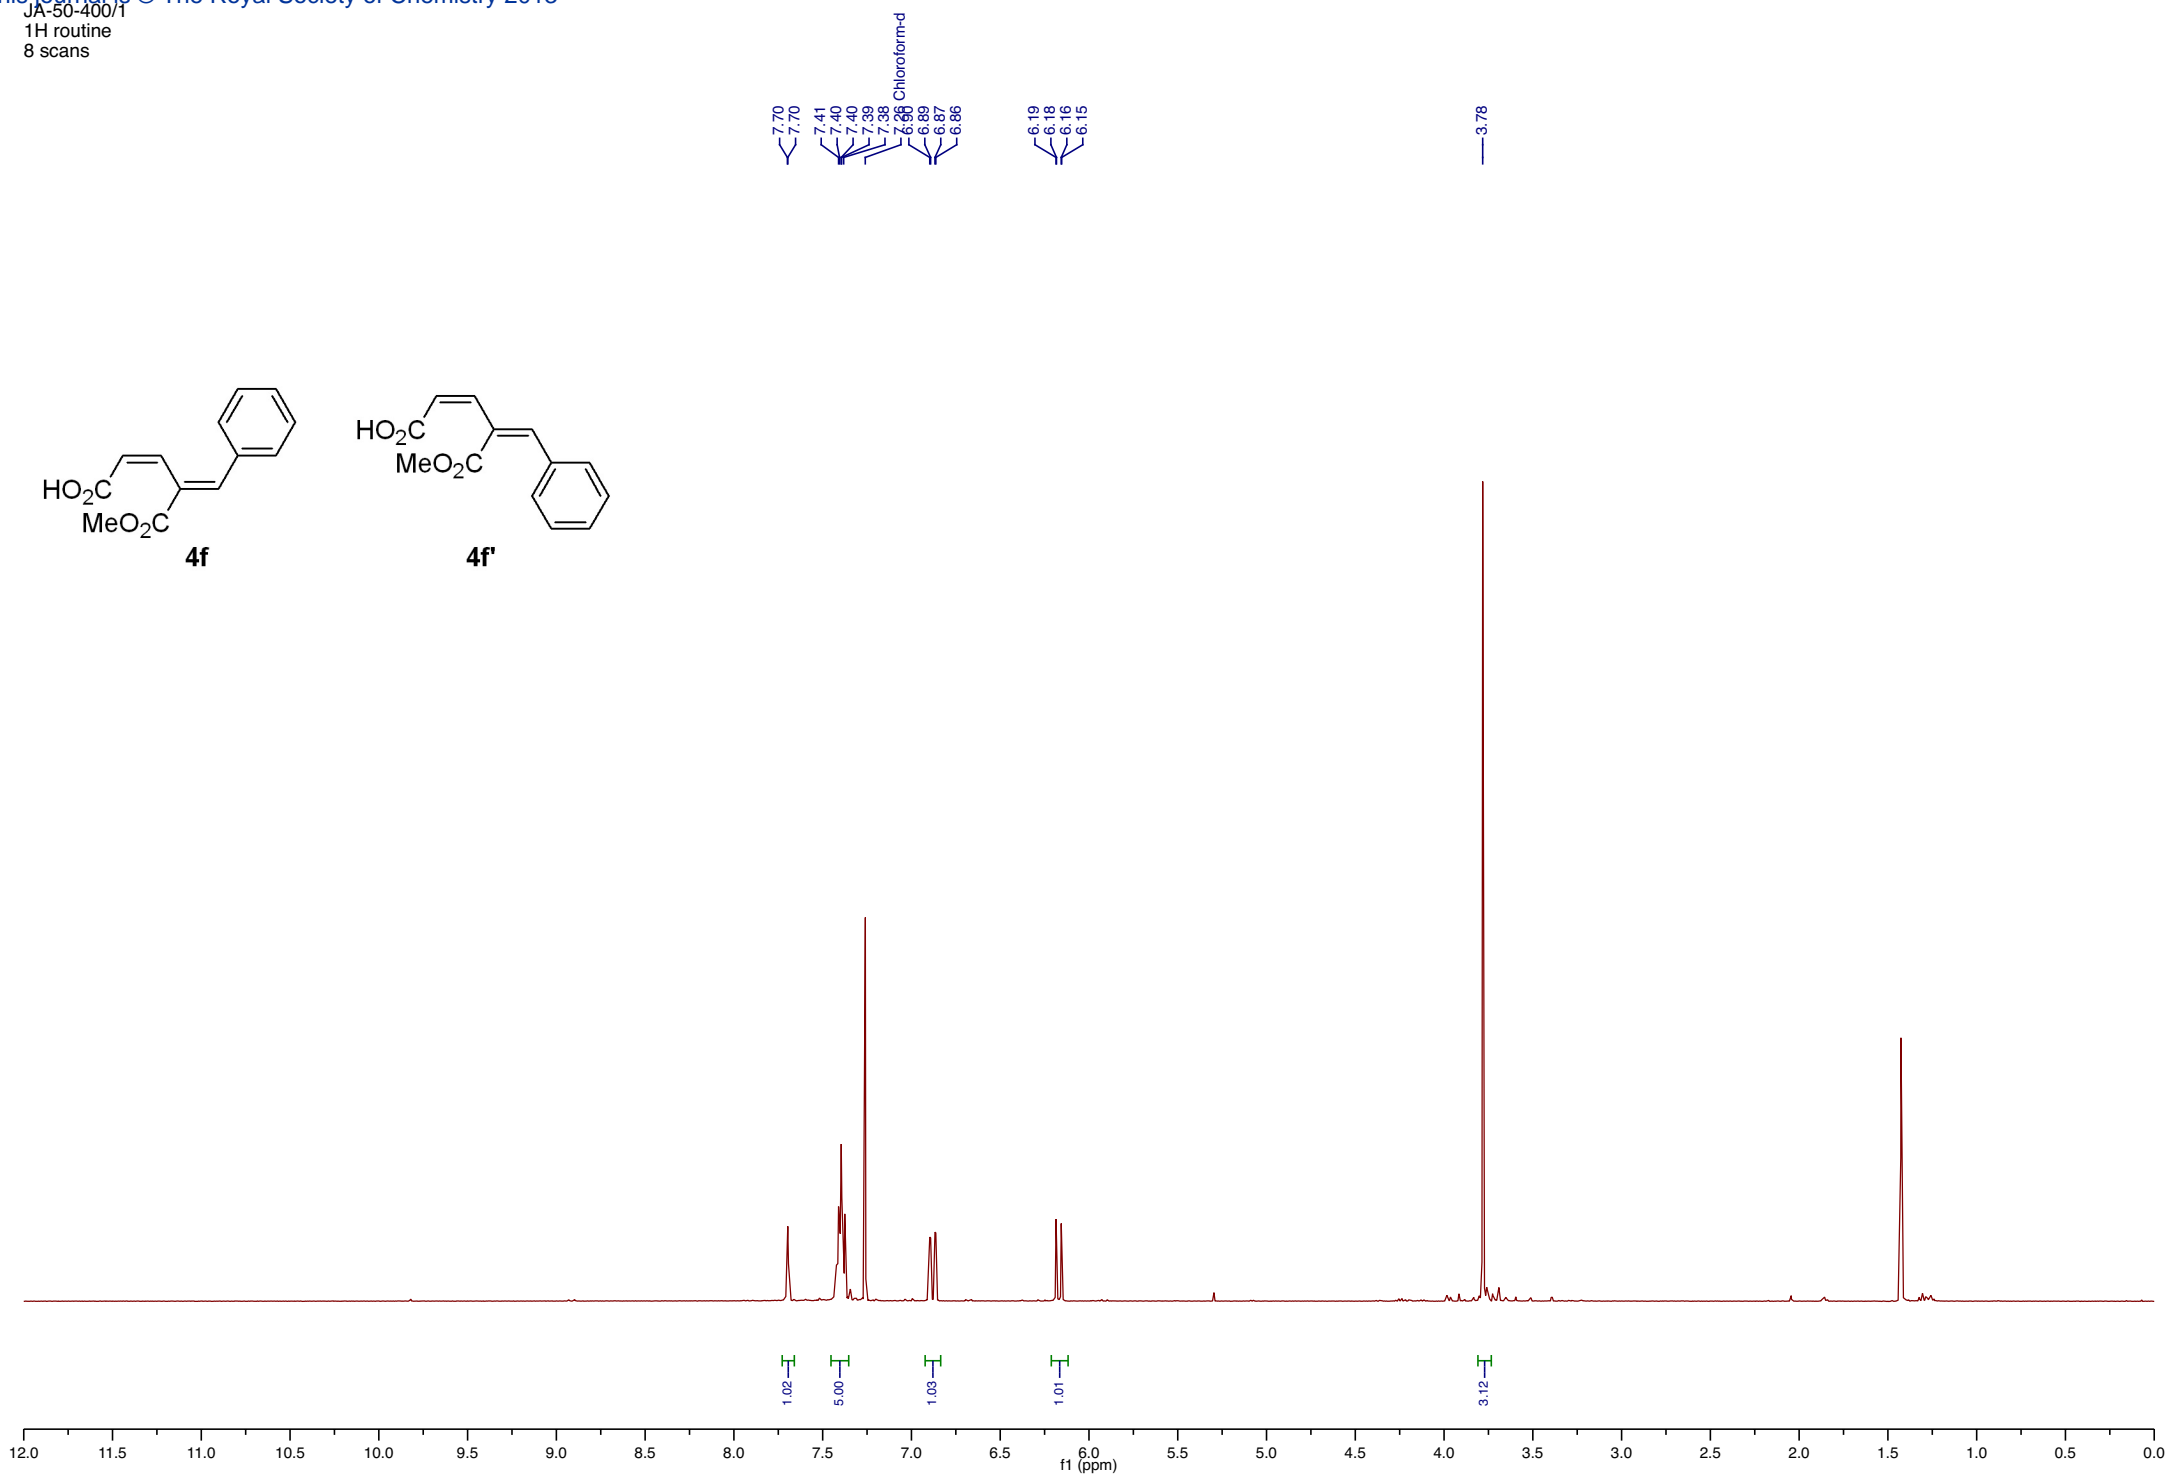

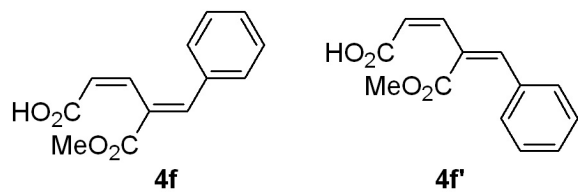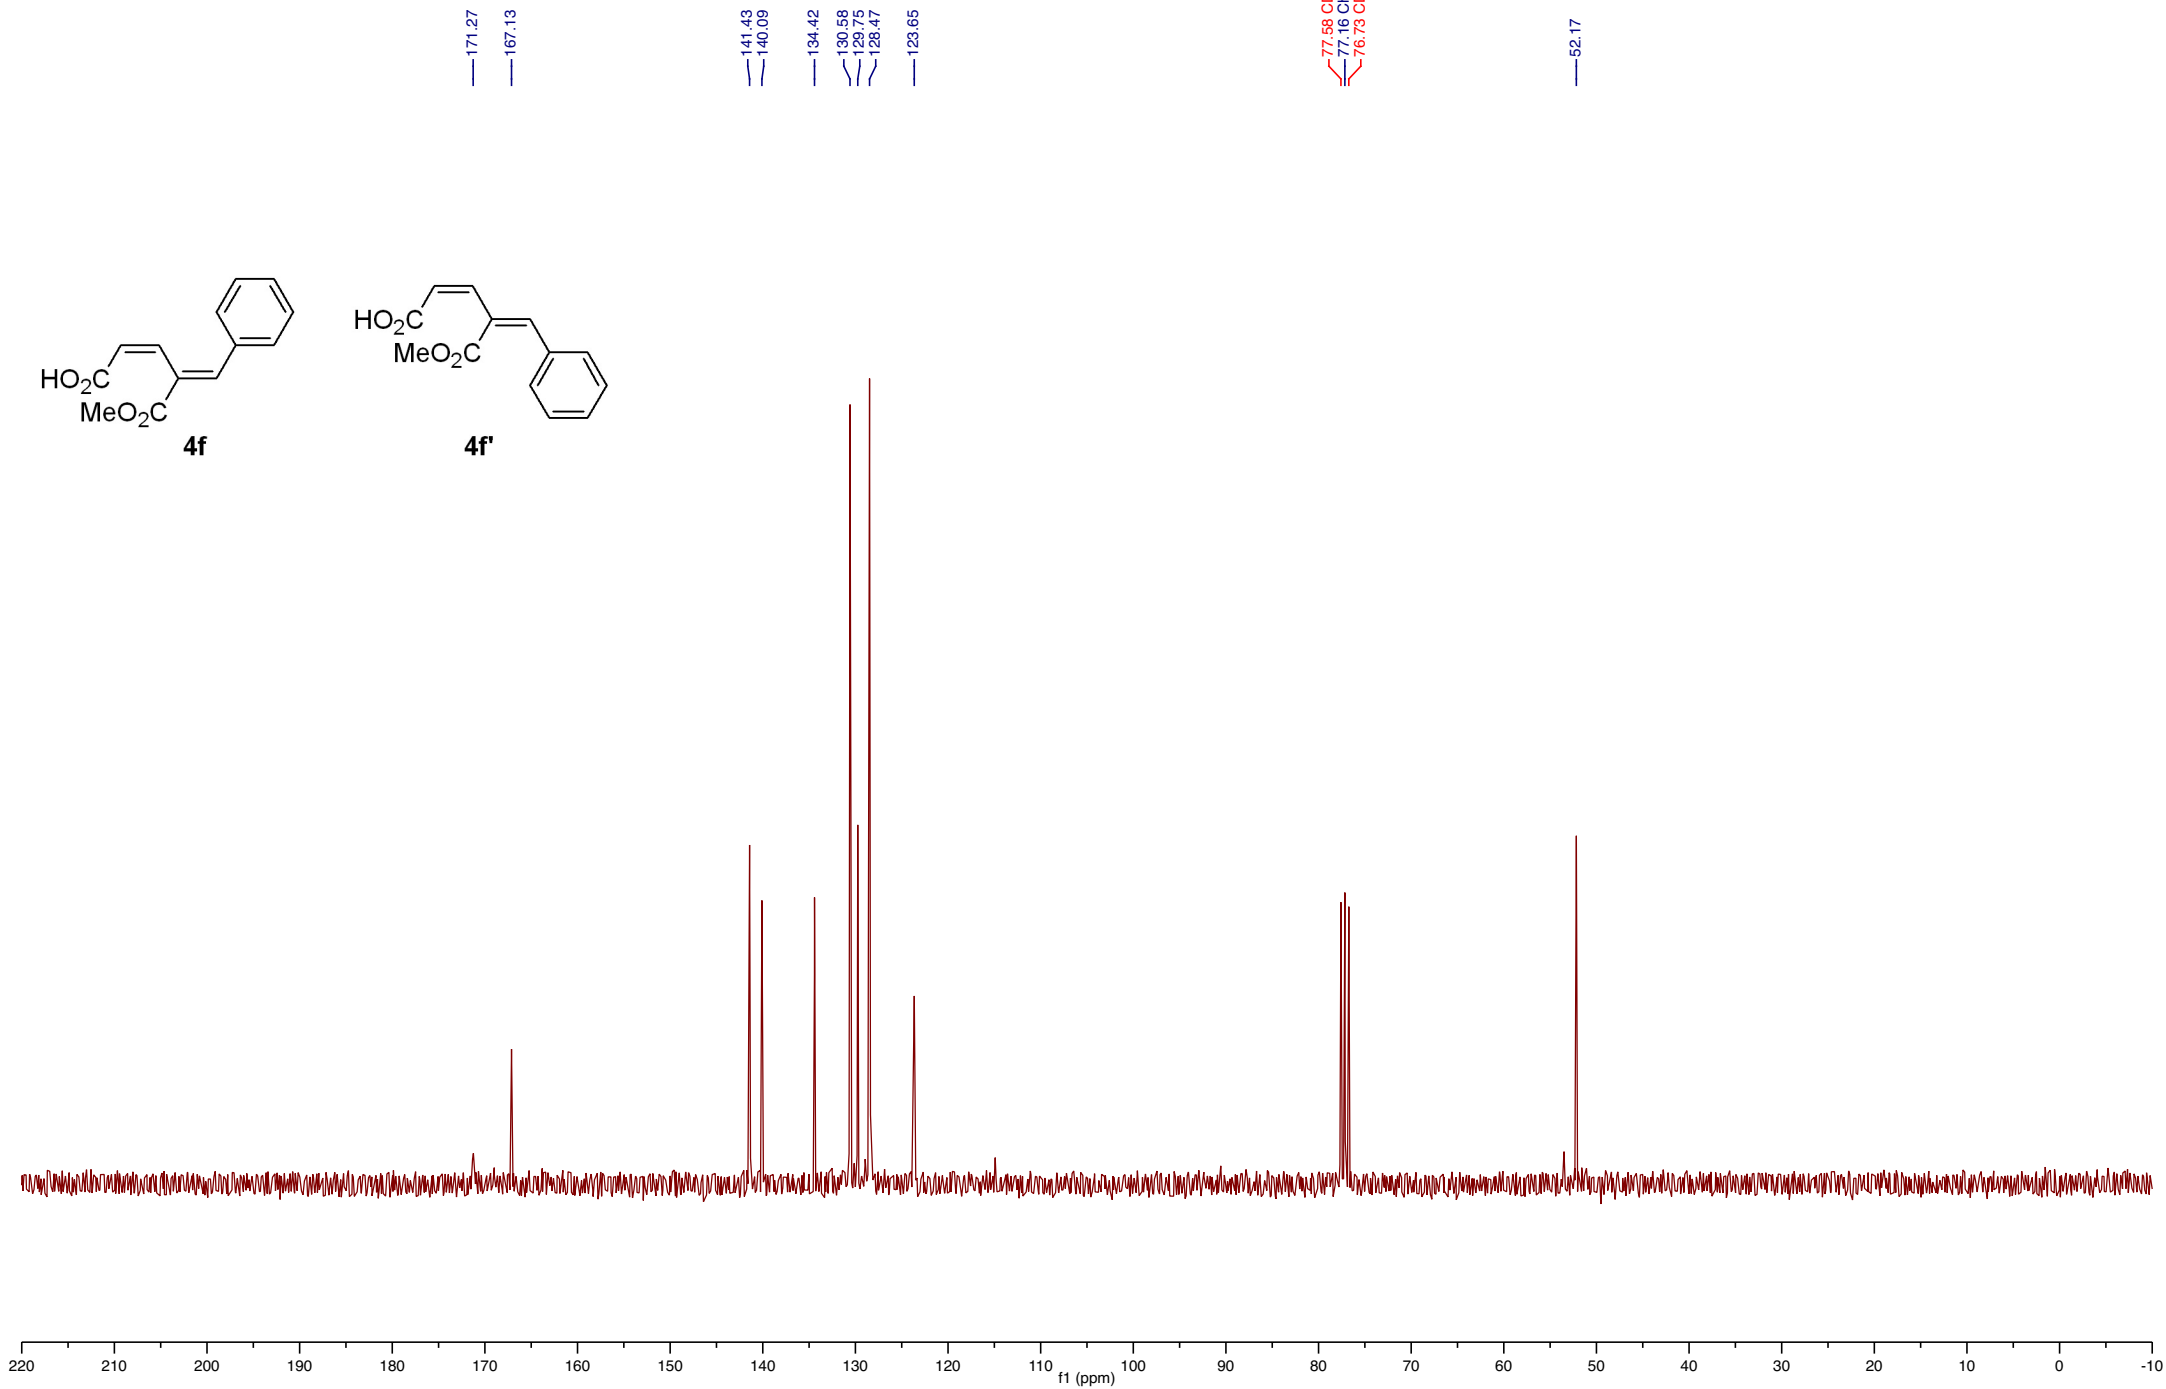



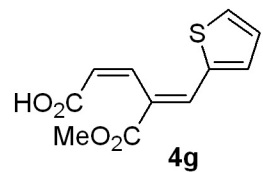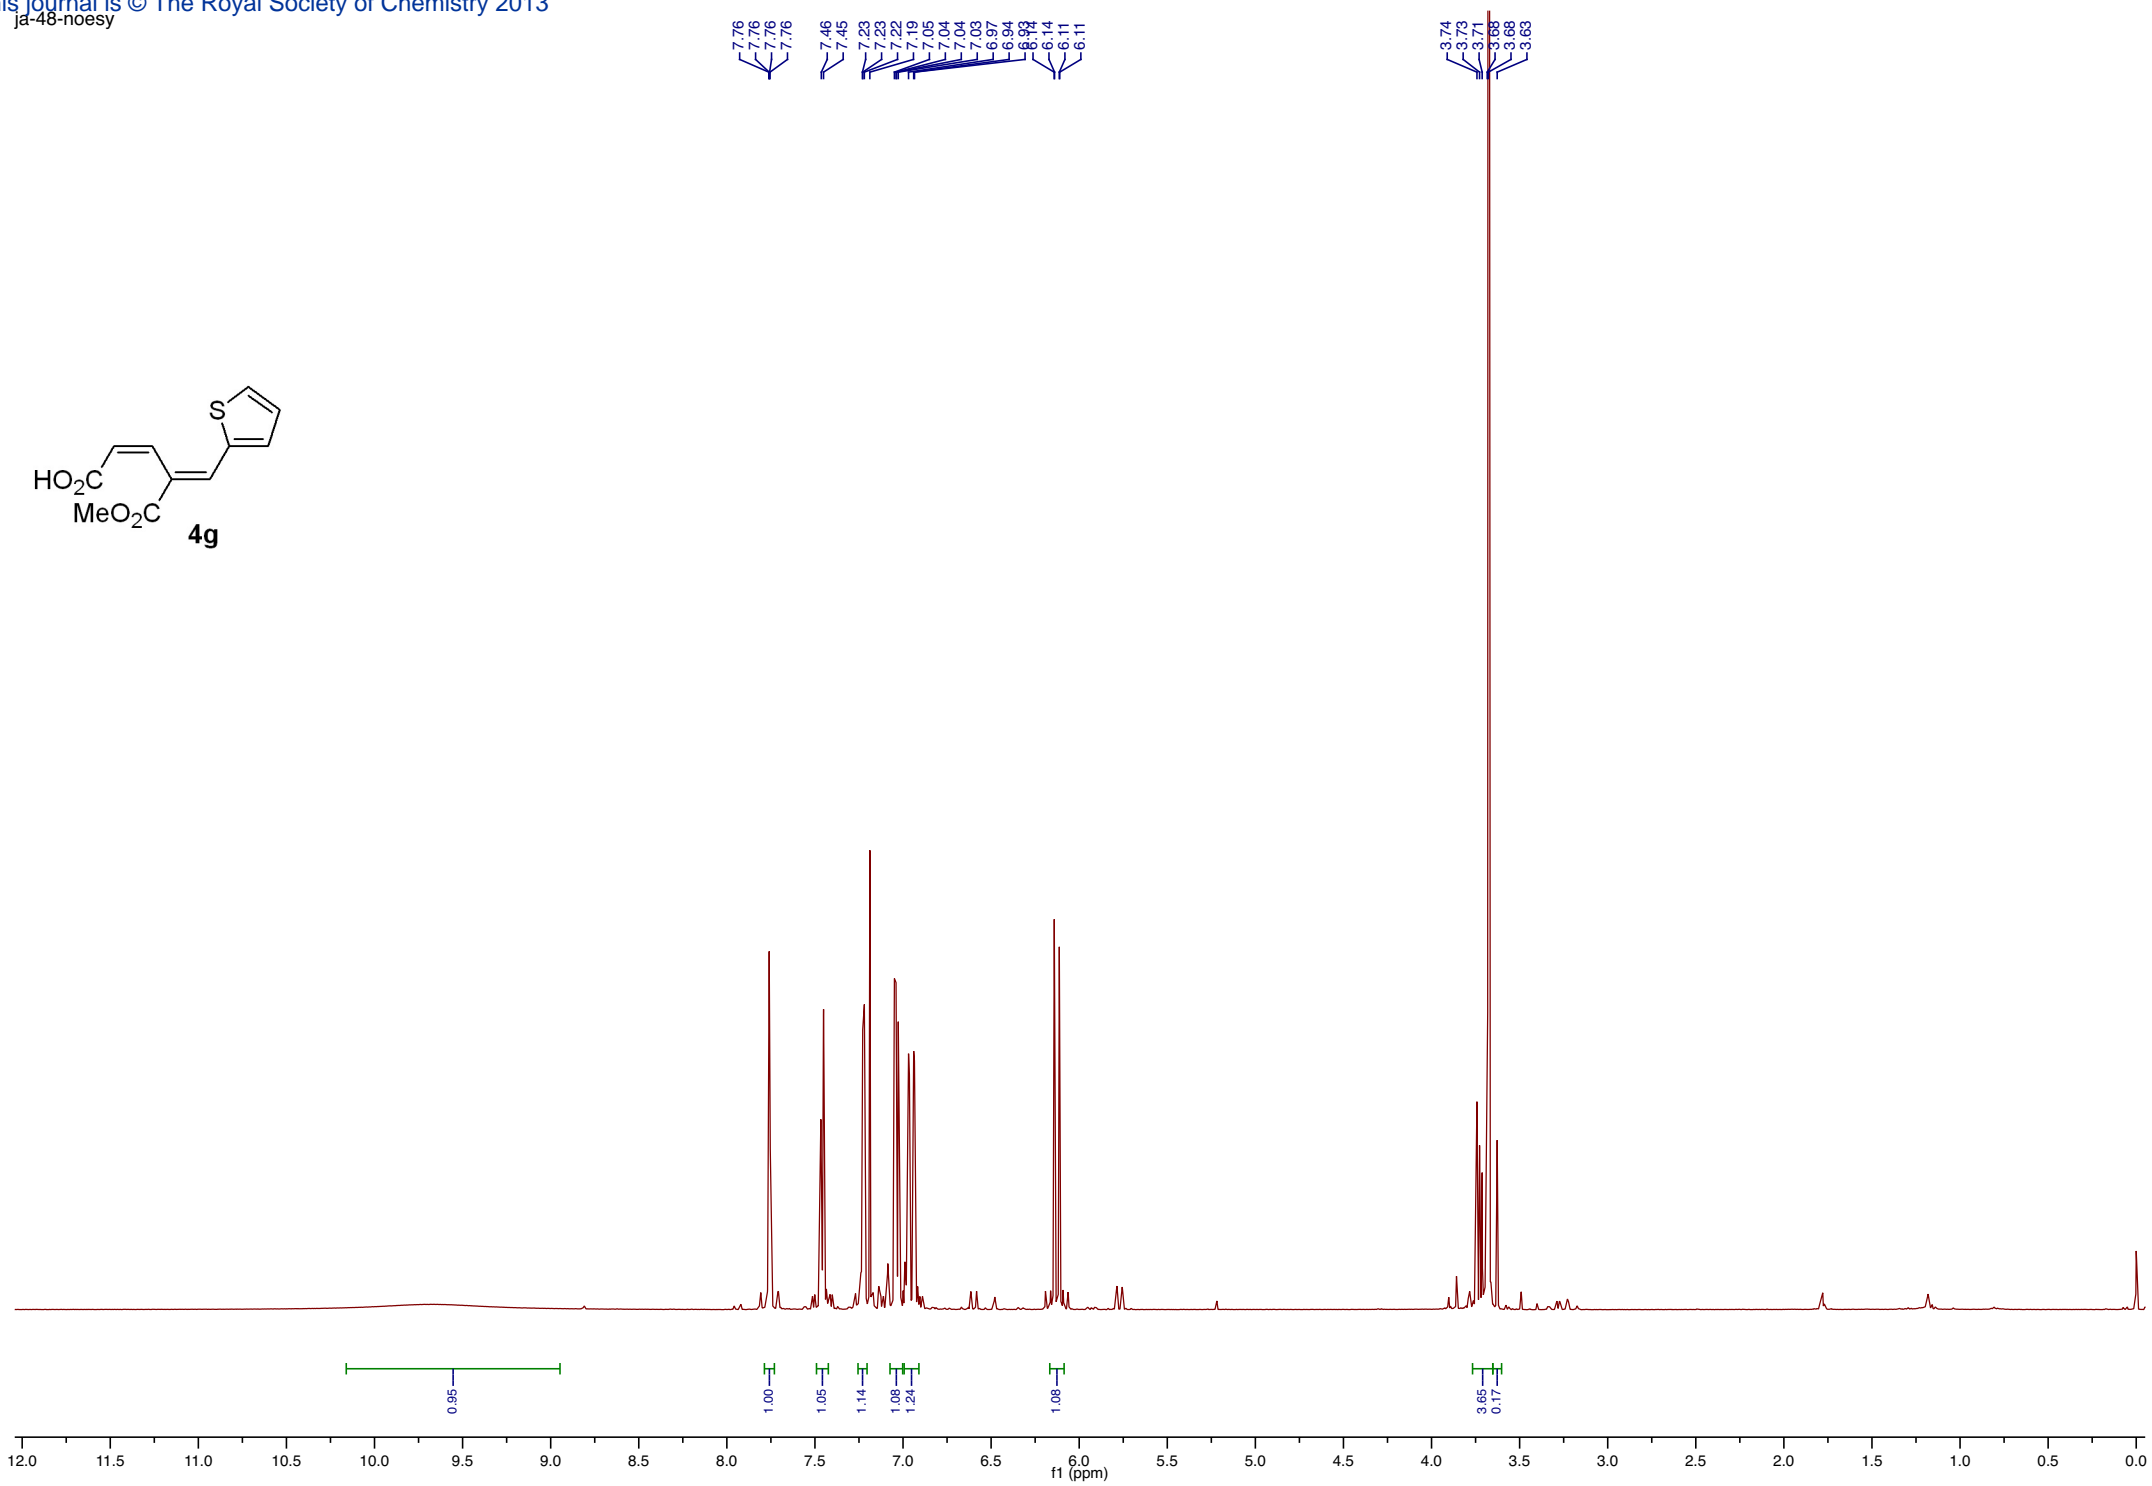

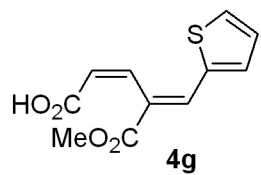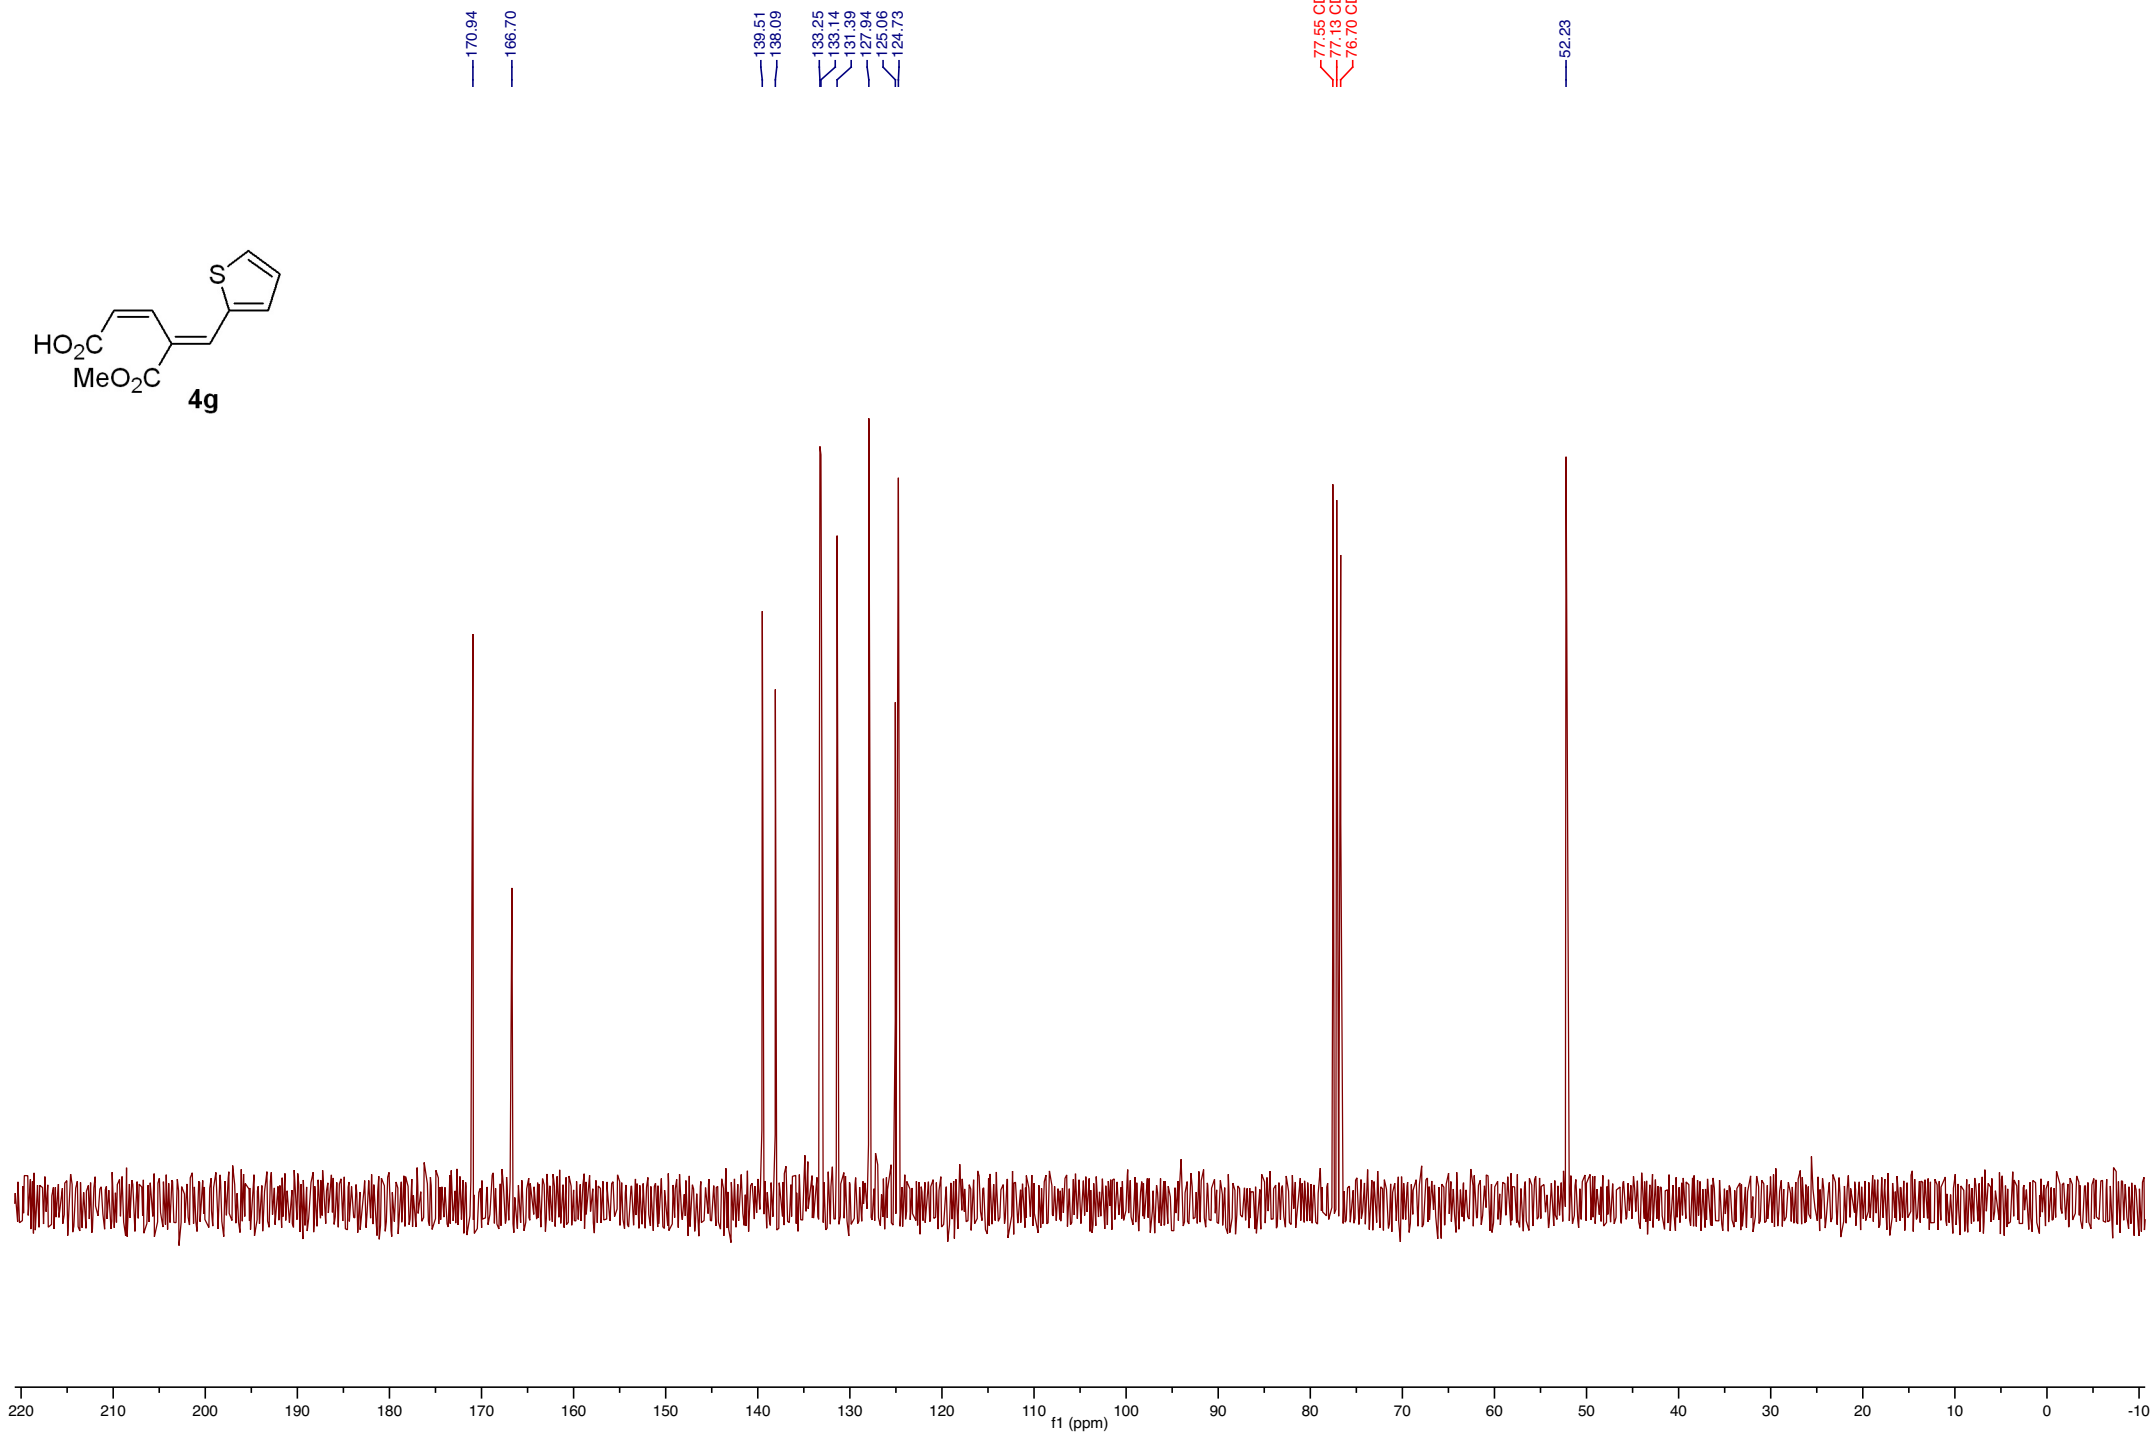

JA-55-02/1  
Spectre 1H routine en 8 Scan

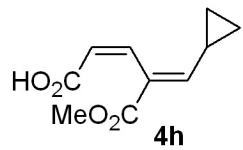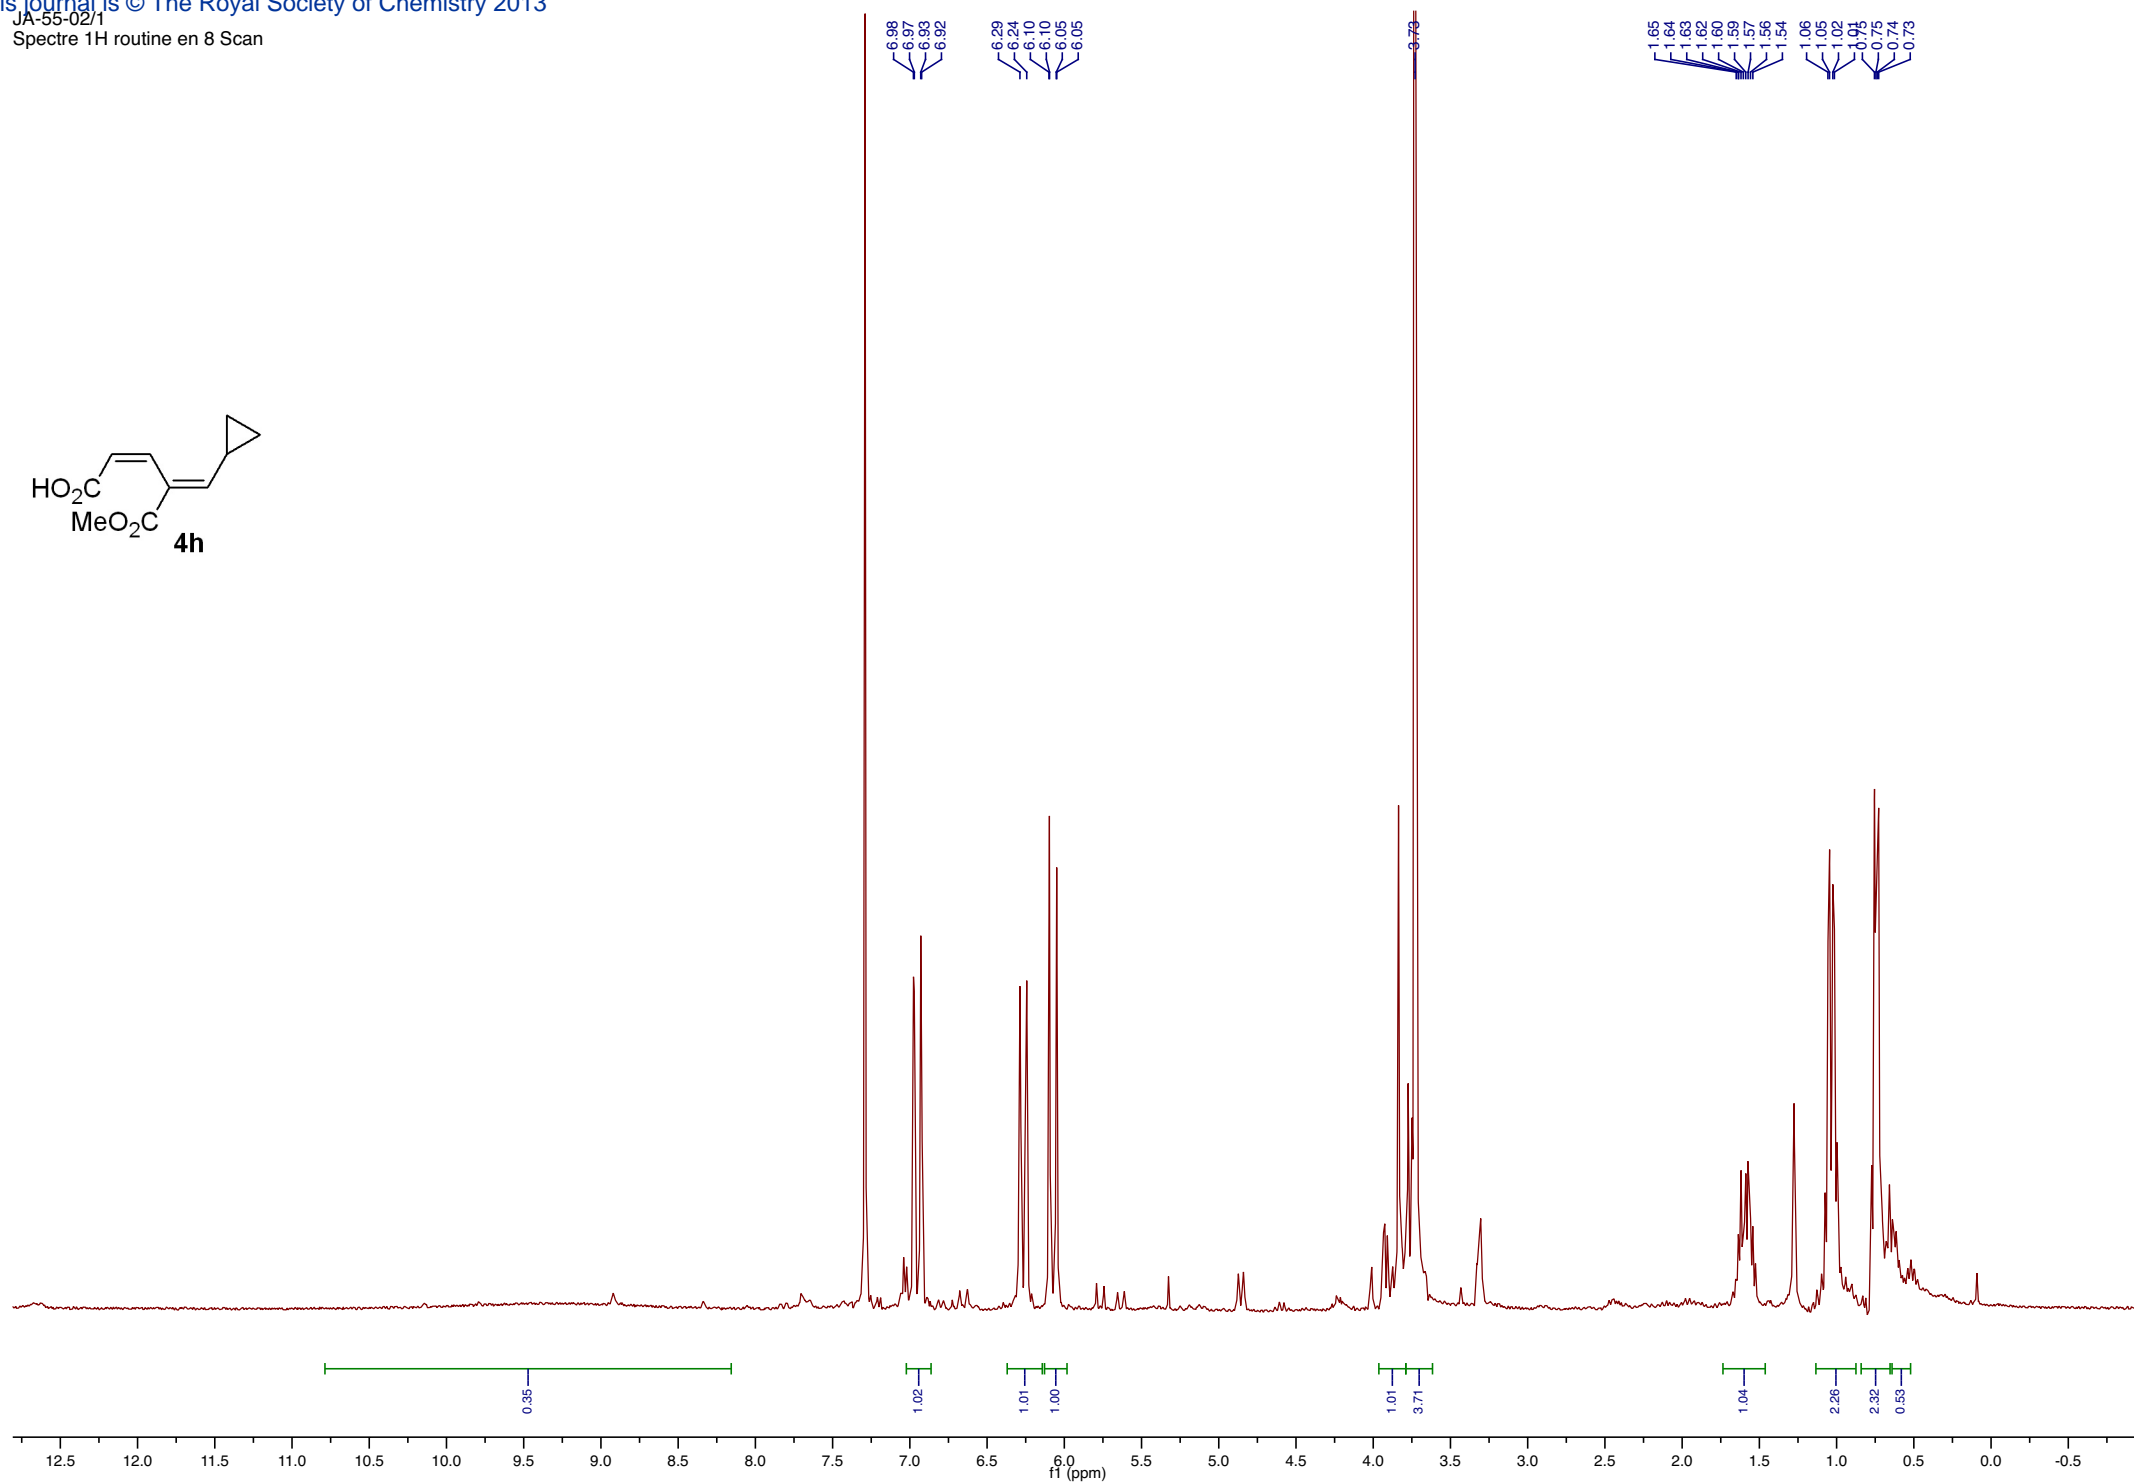

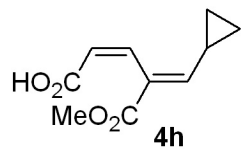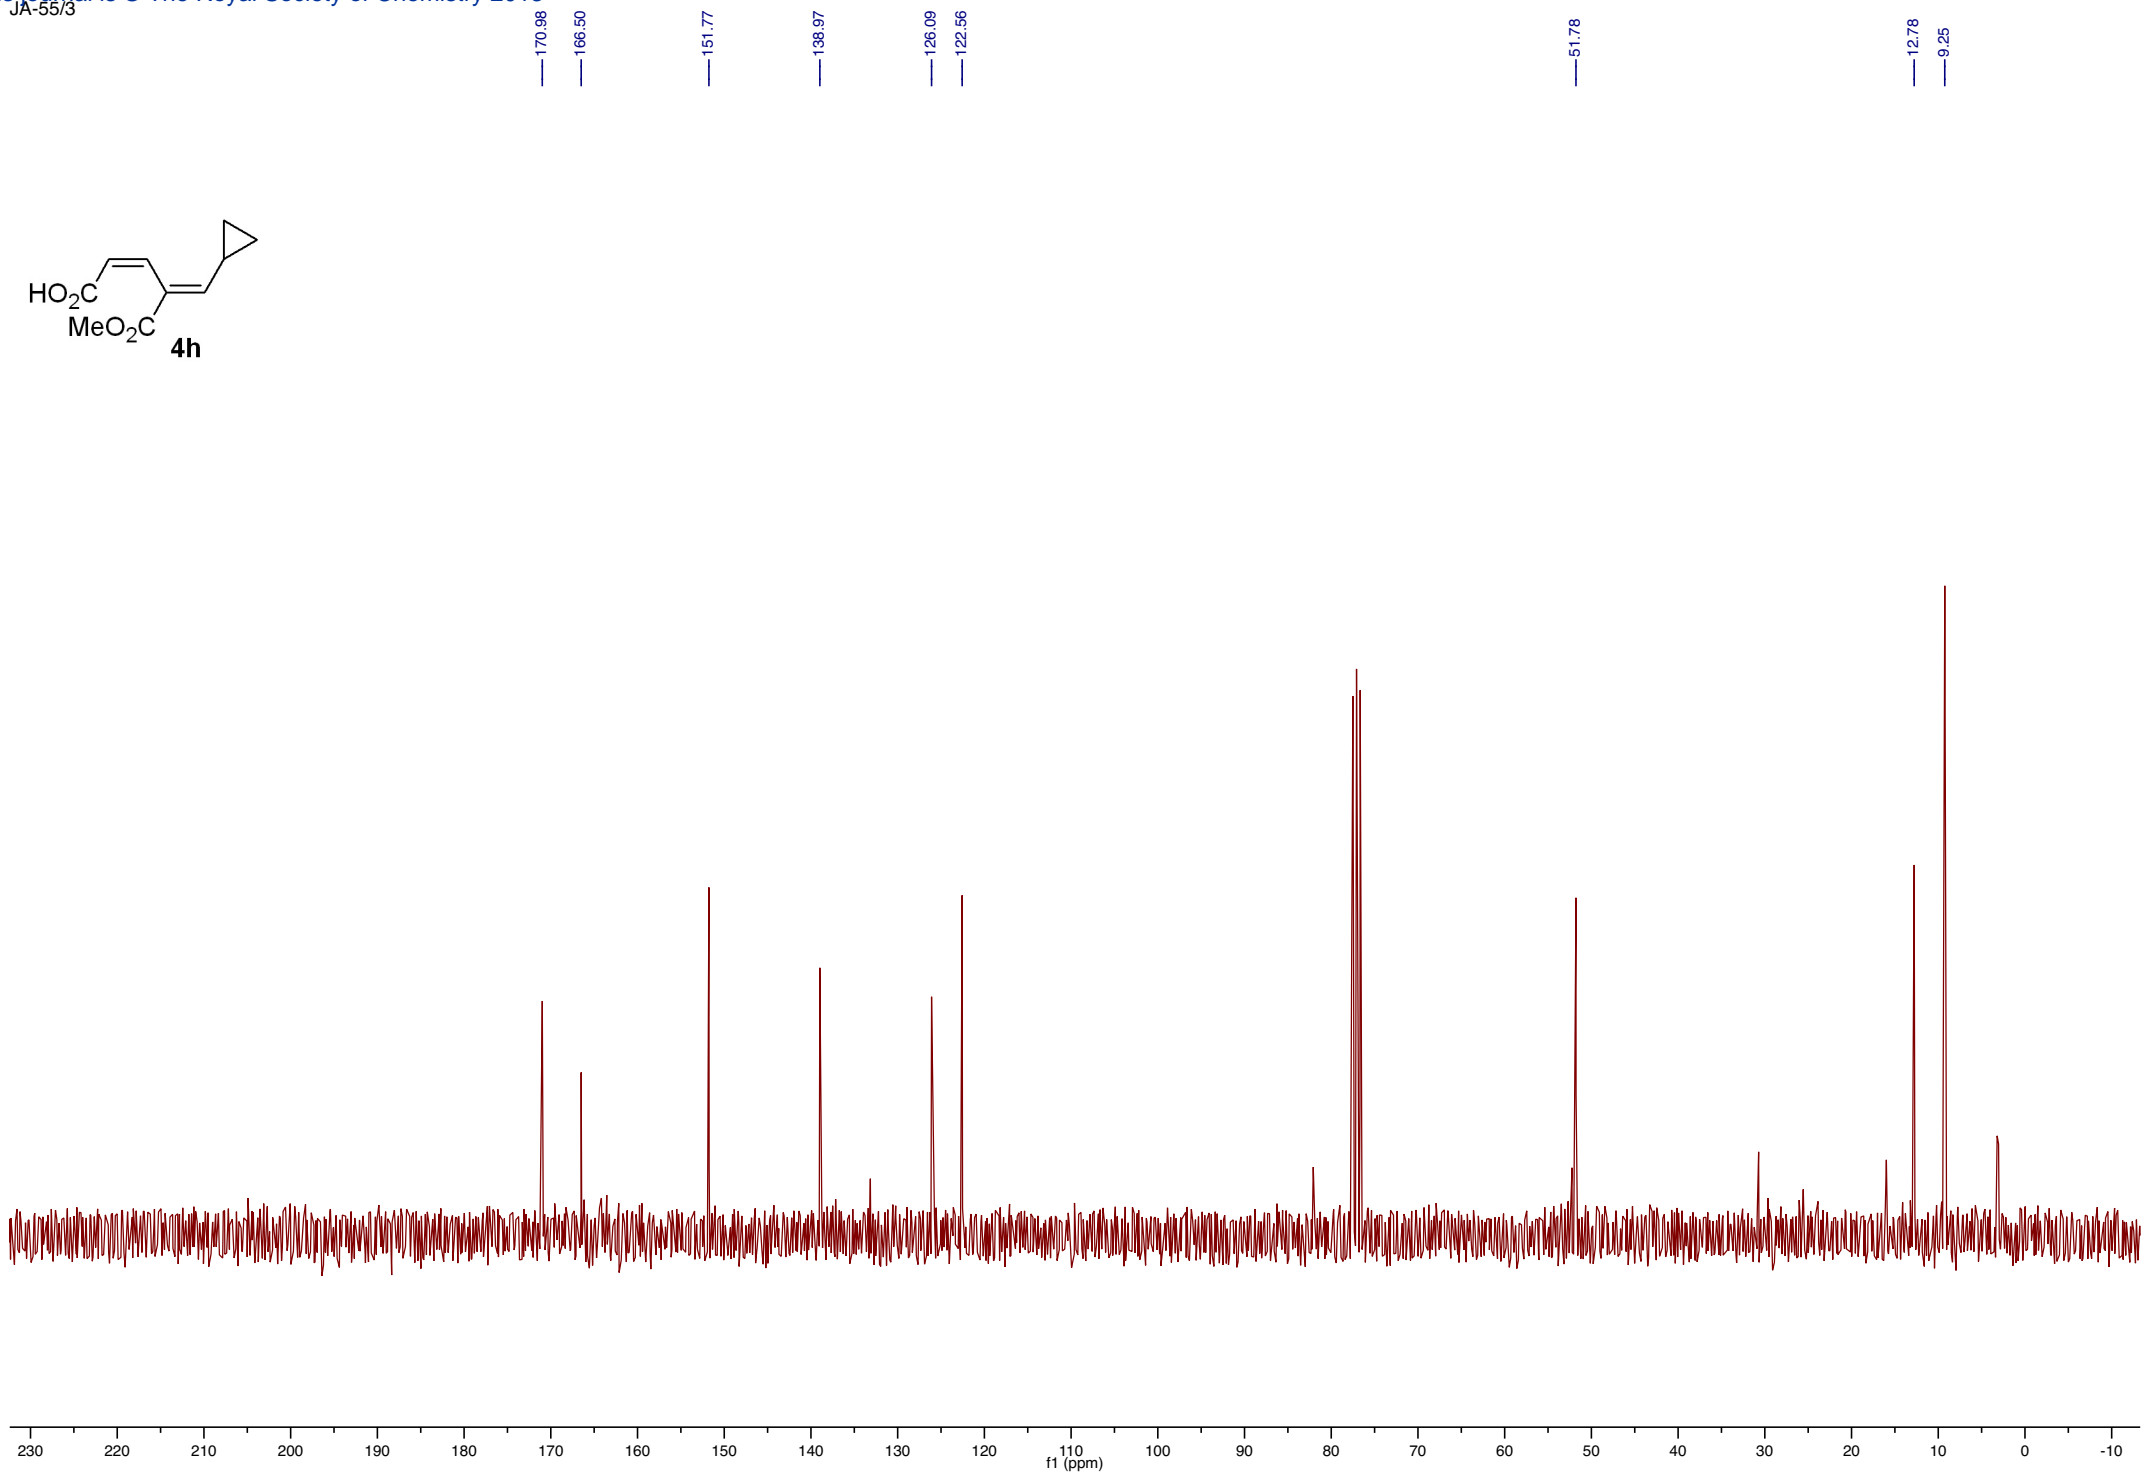

LDOB-33-quench/1  
Spectre 1H routine en 8 Scan  
quench sans THF

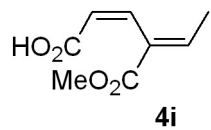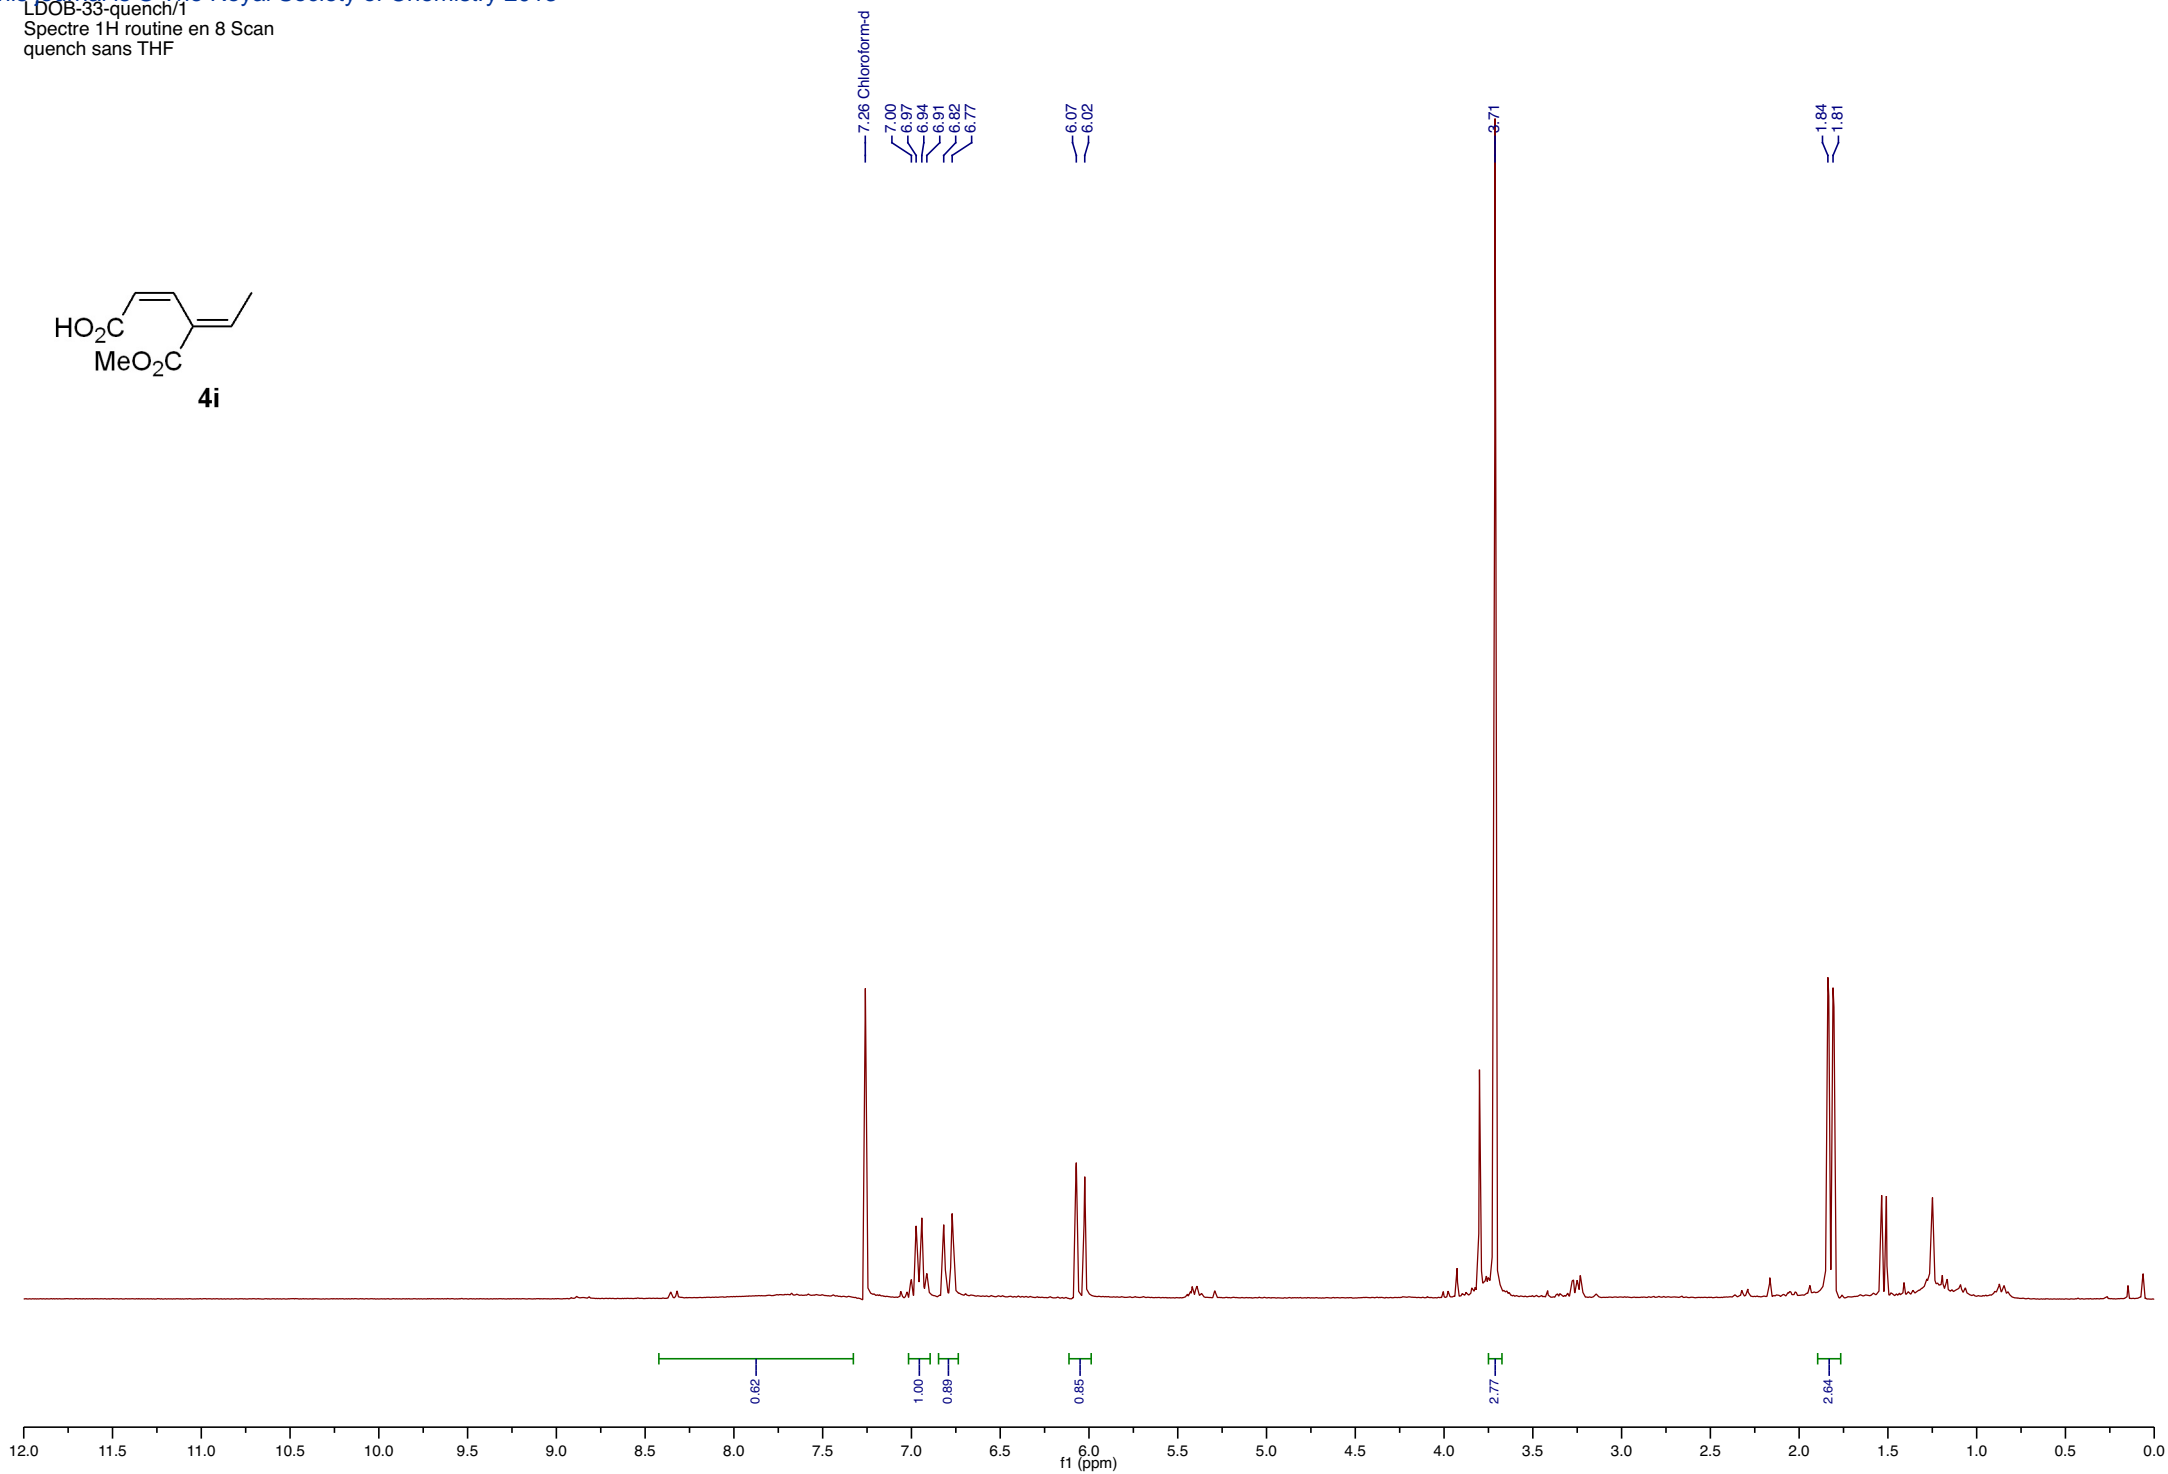

CCLS-019/1

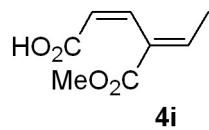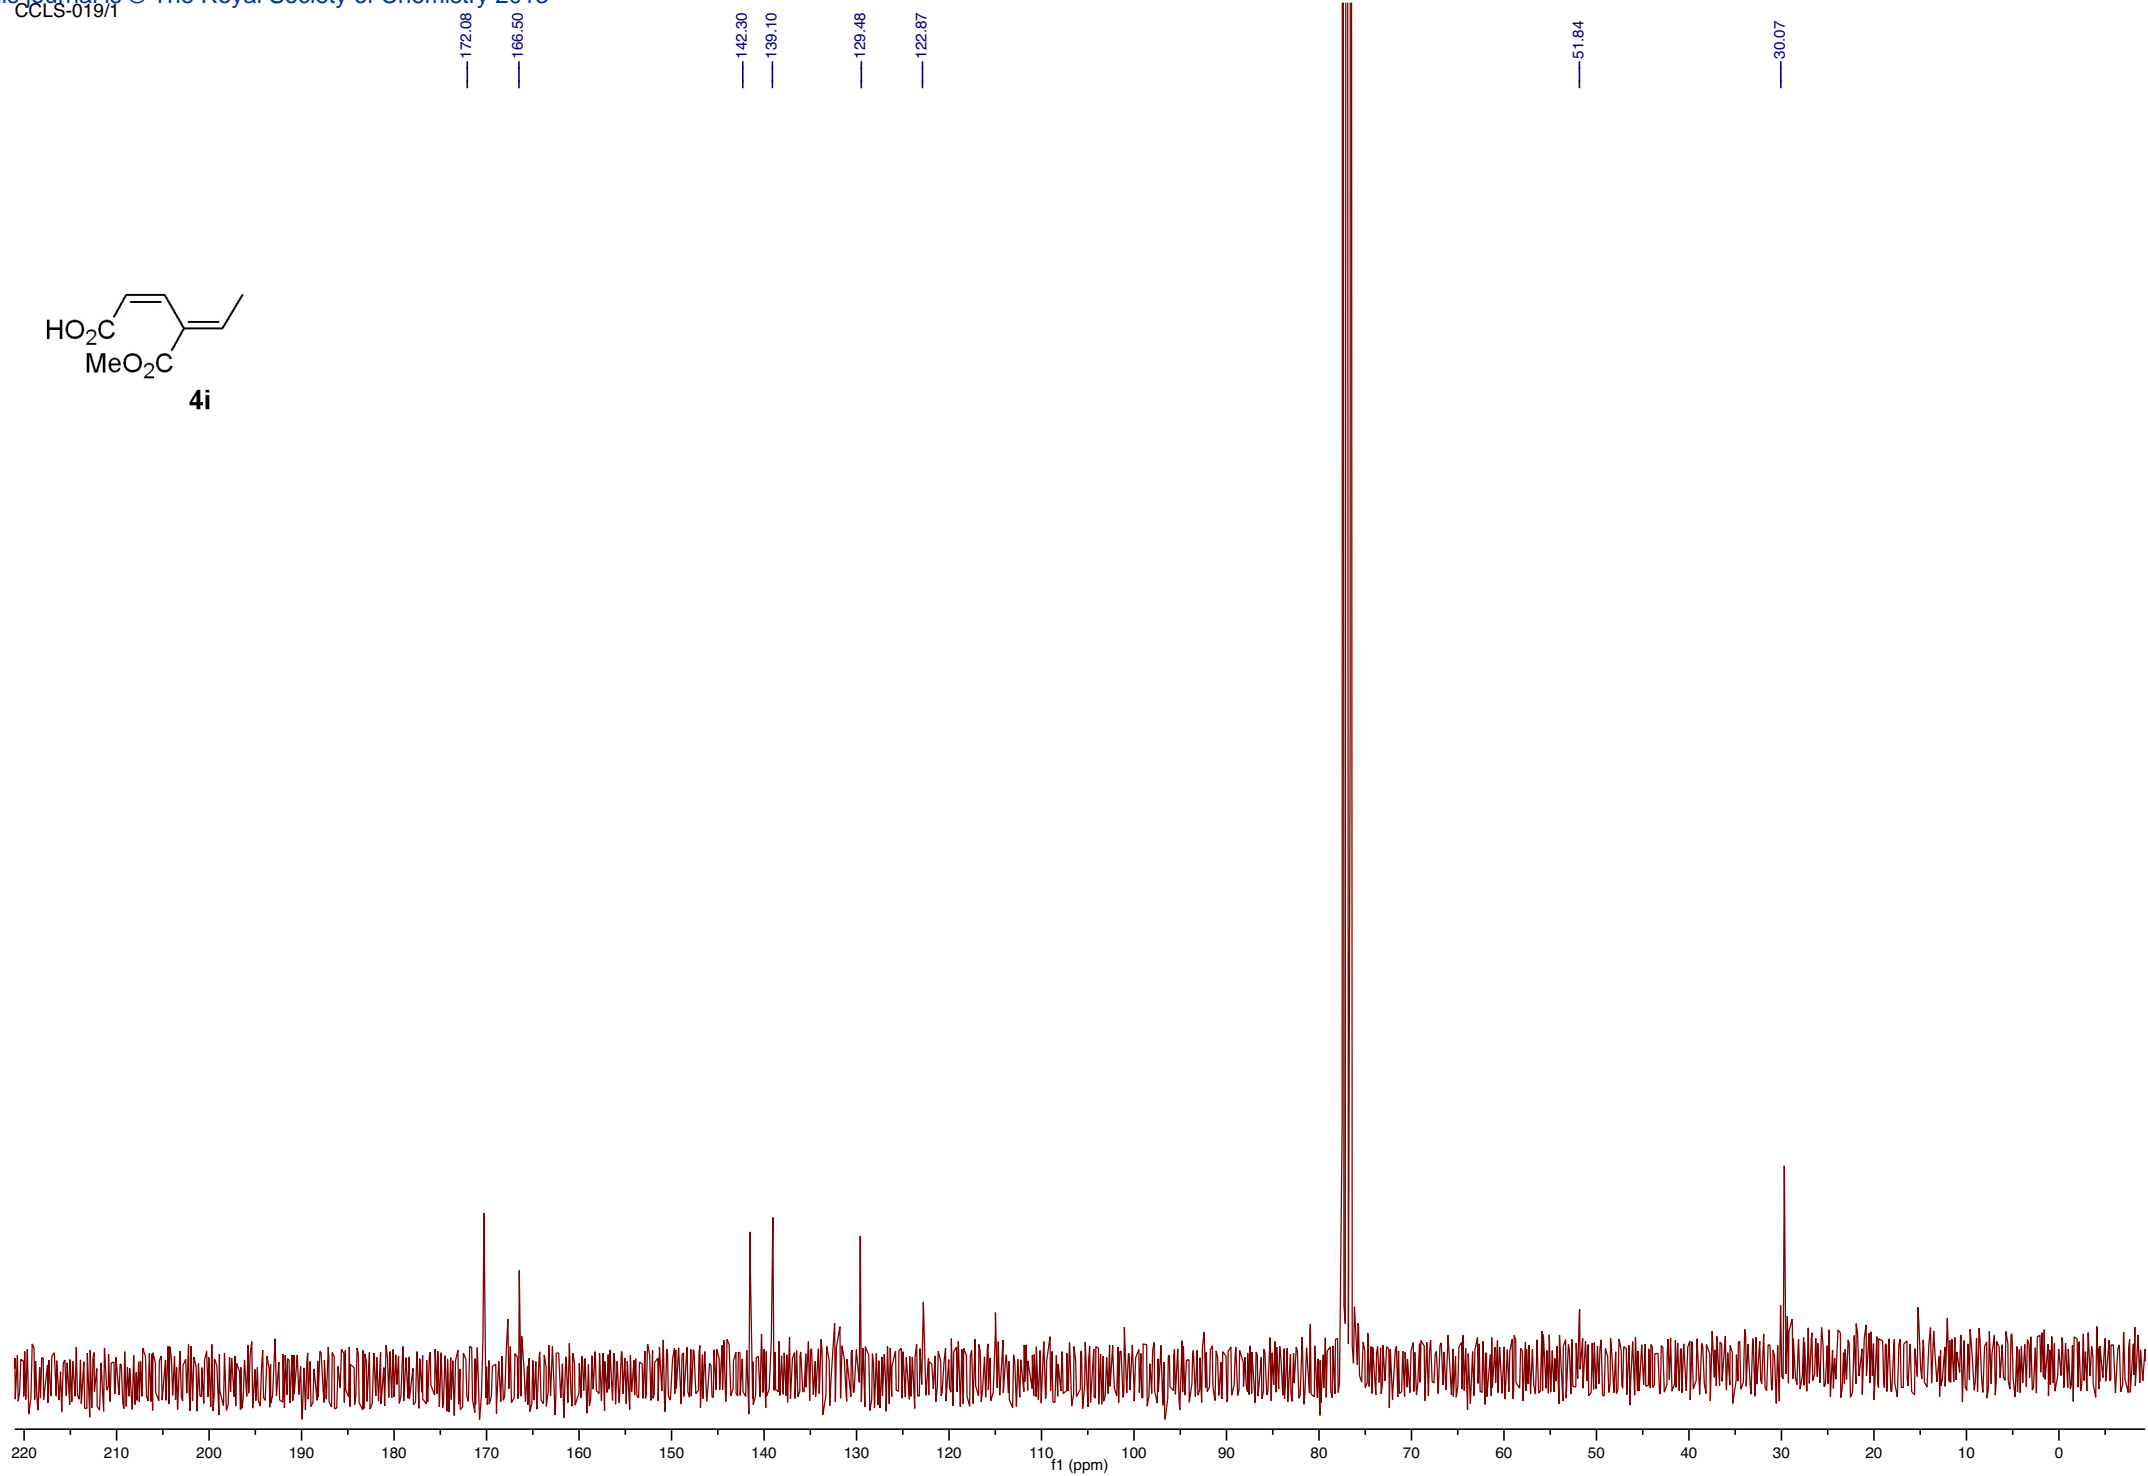

LDOB-2771  
Spectre 1H routine en 8 Scan

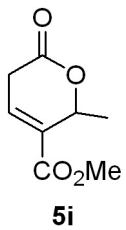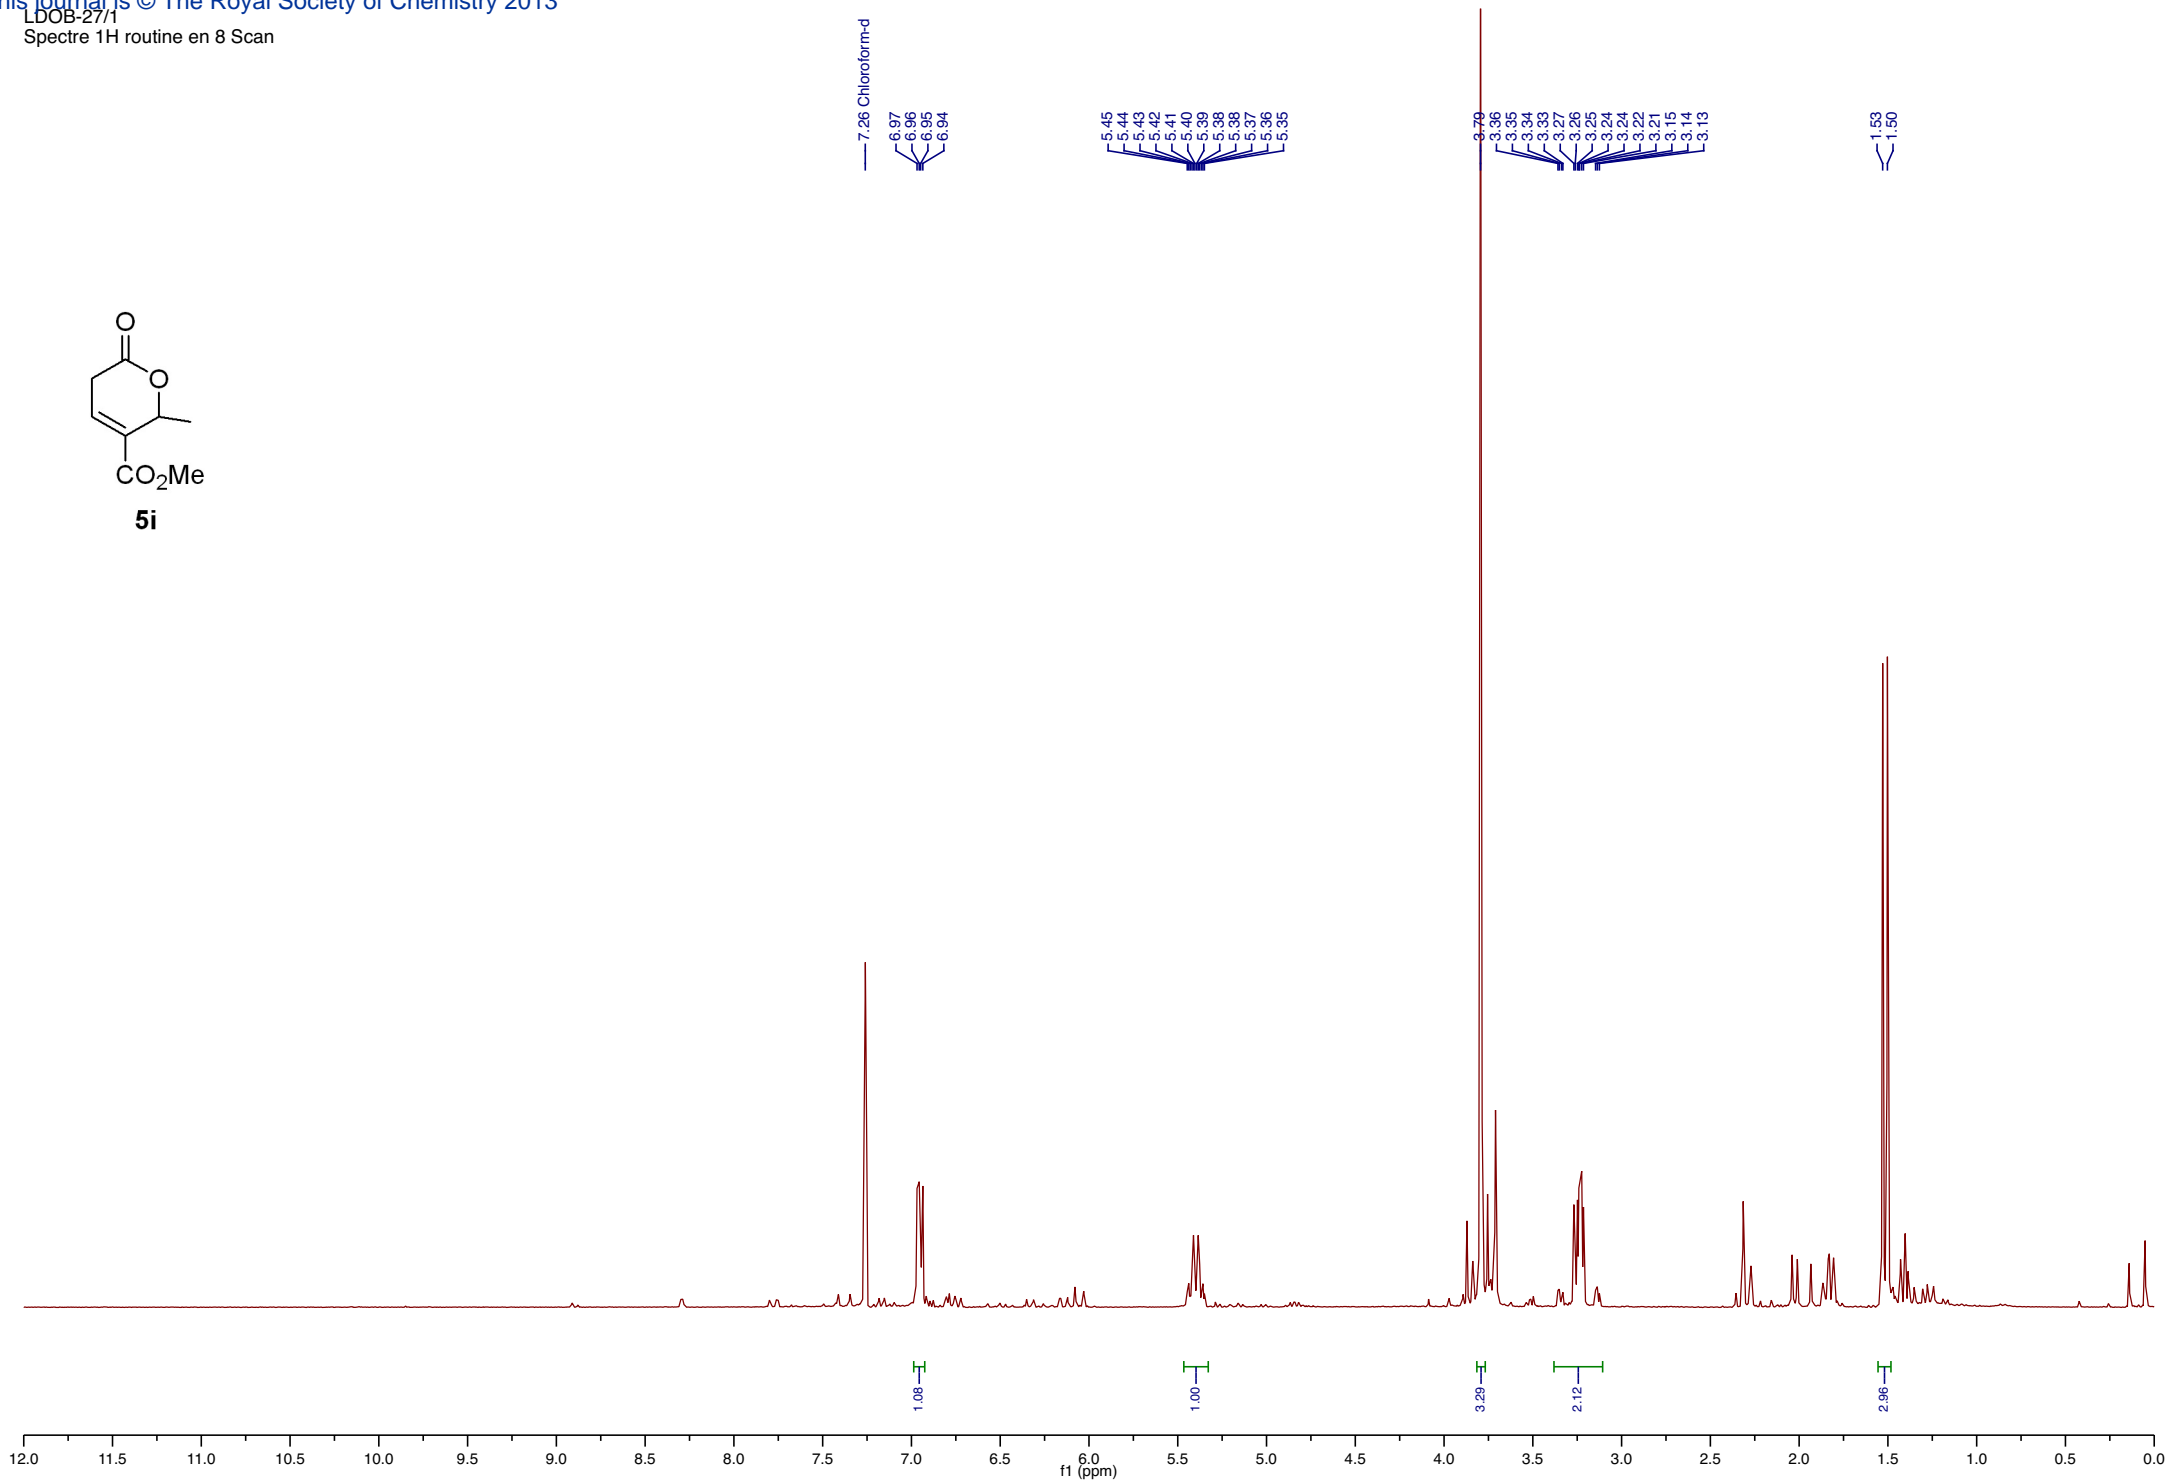

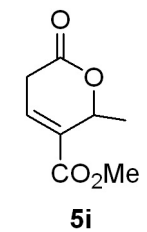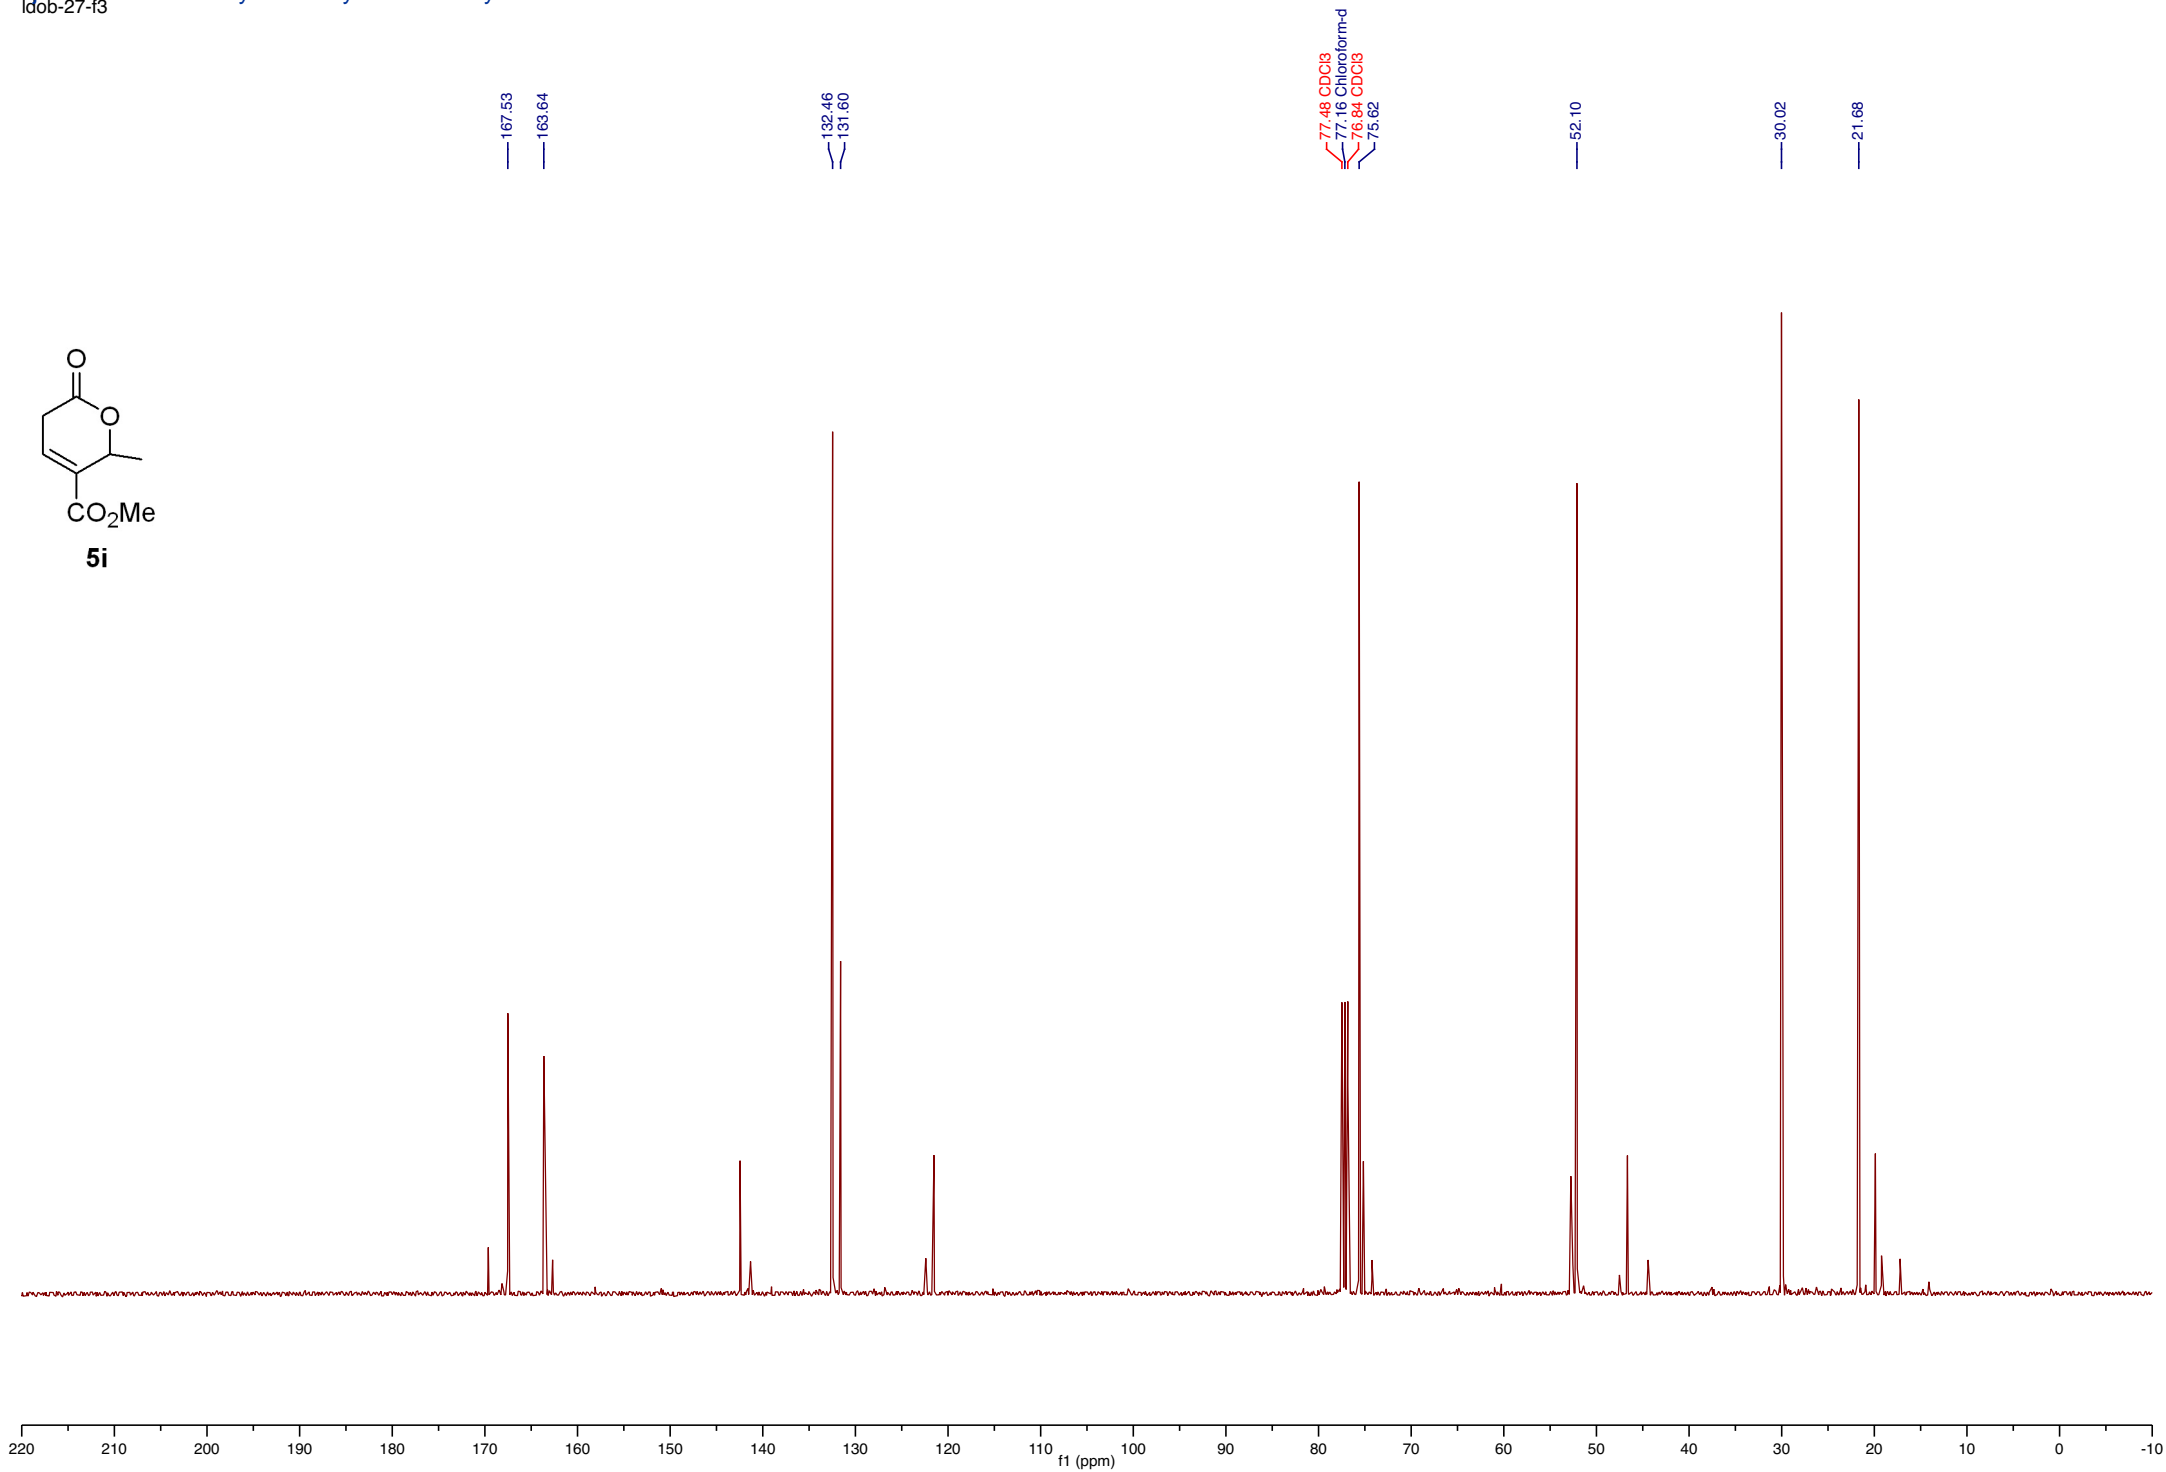



JA-42-A/1

Spectre 1H routine en 8 Scan

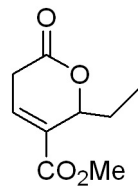

**5j**

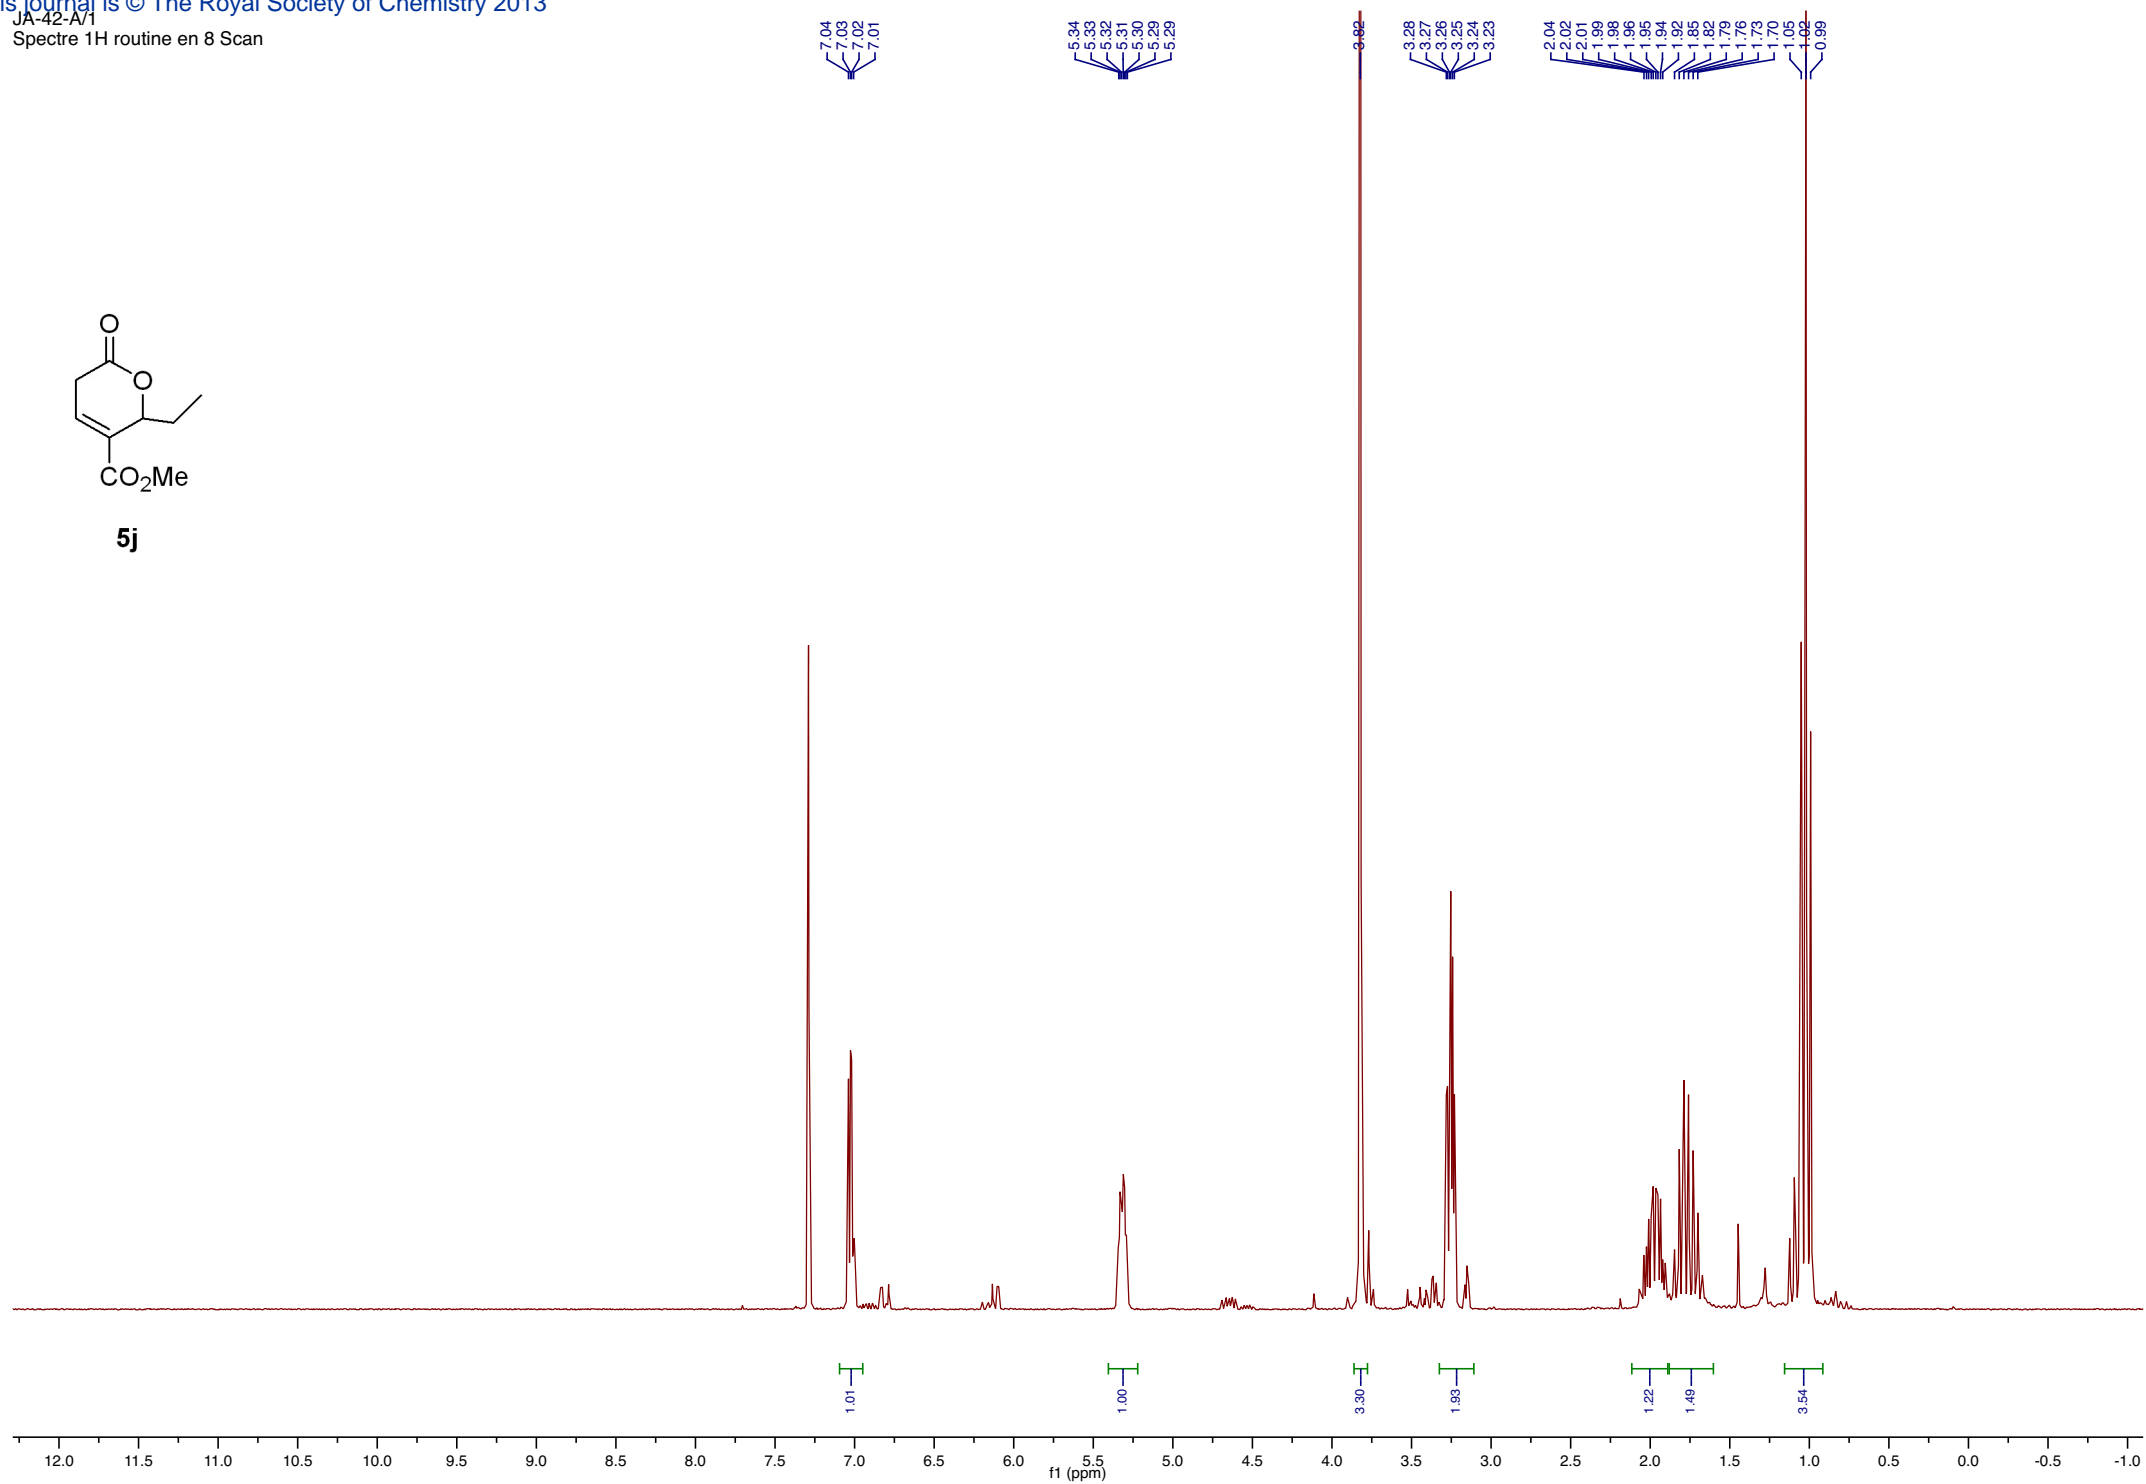

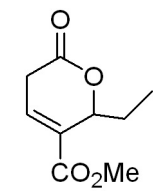

**5j**

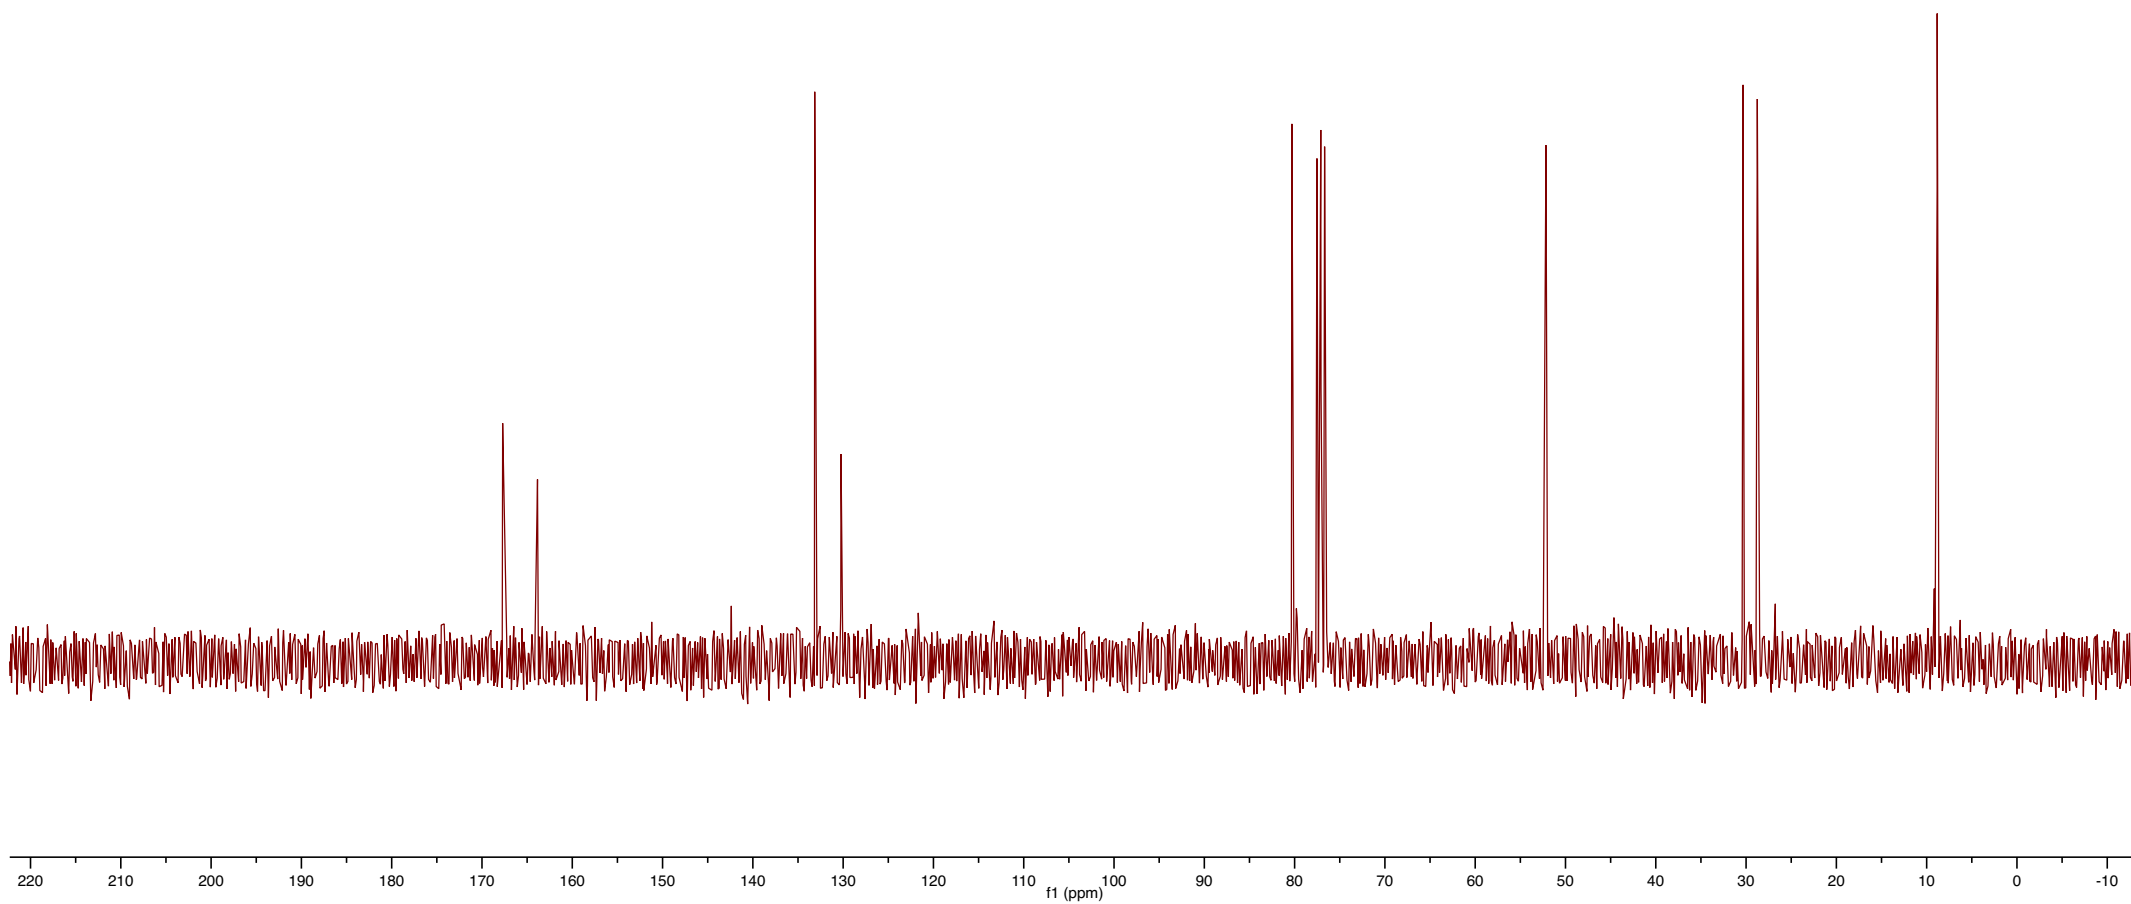

LD08-19-f1

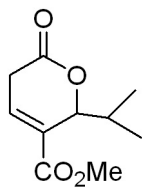

**5k**

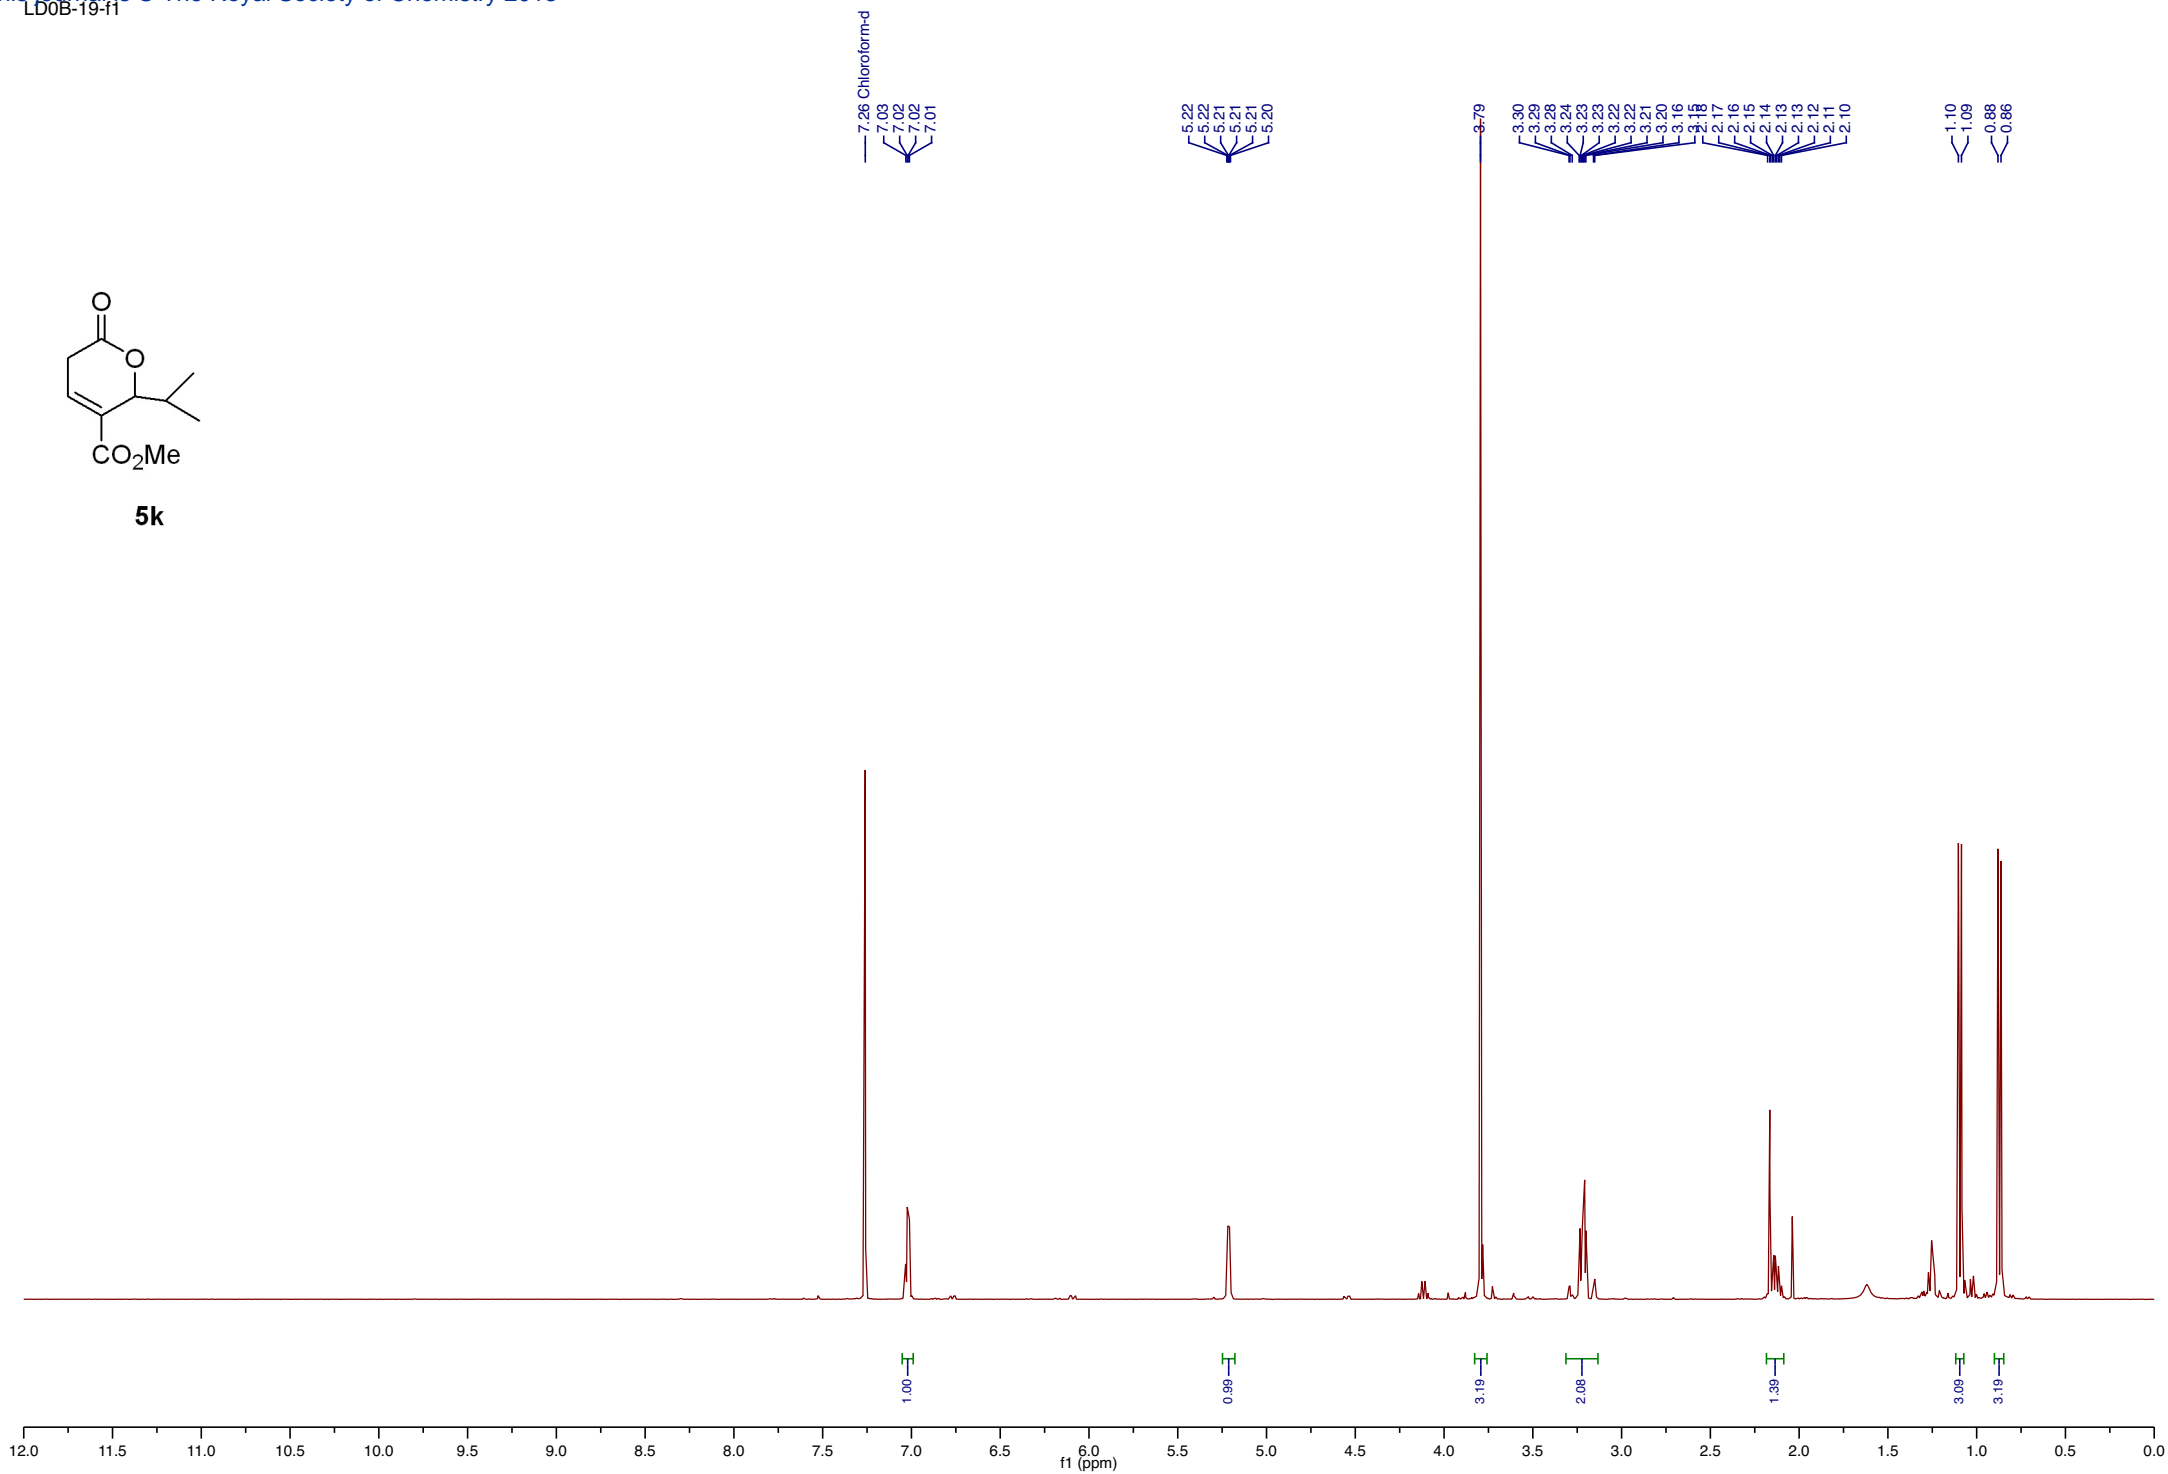

LD0B-19-f1

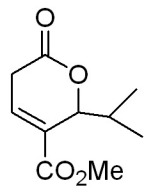

5k

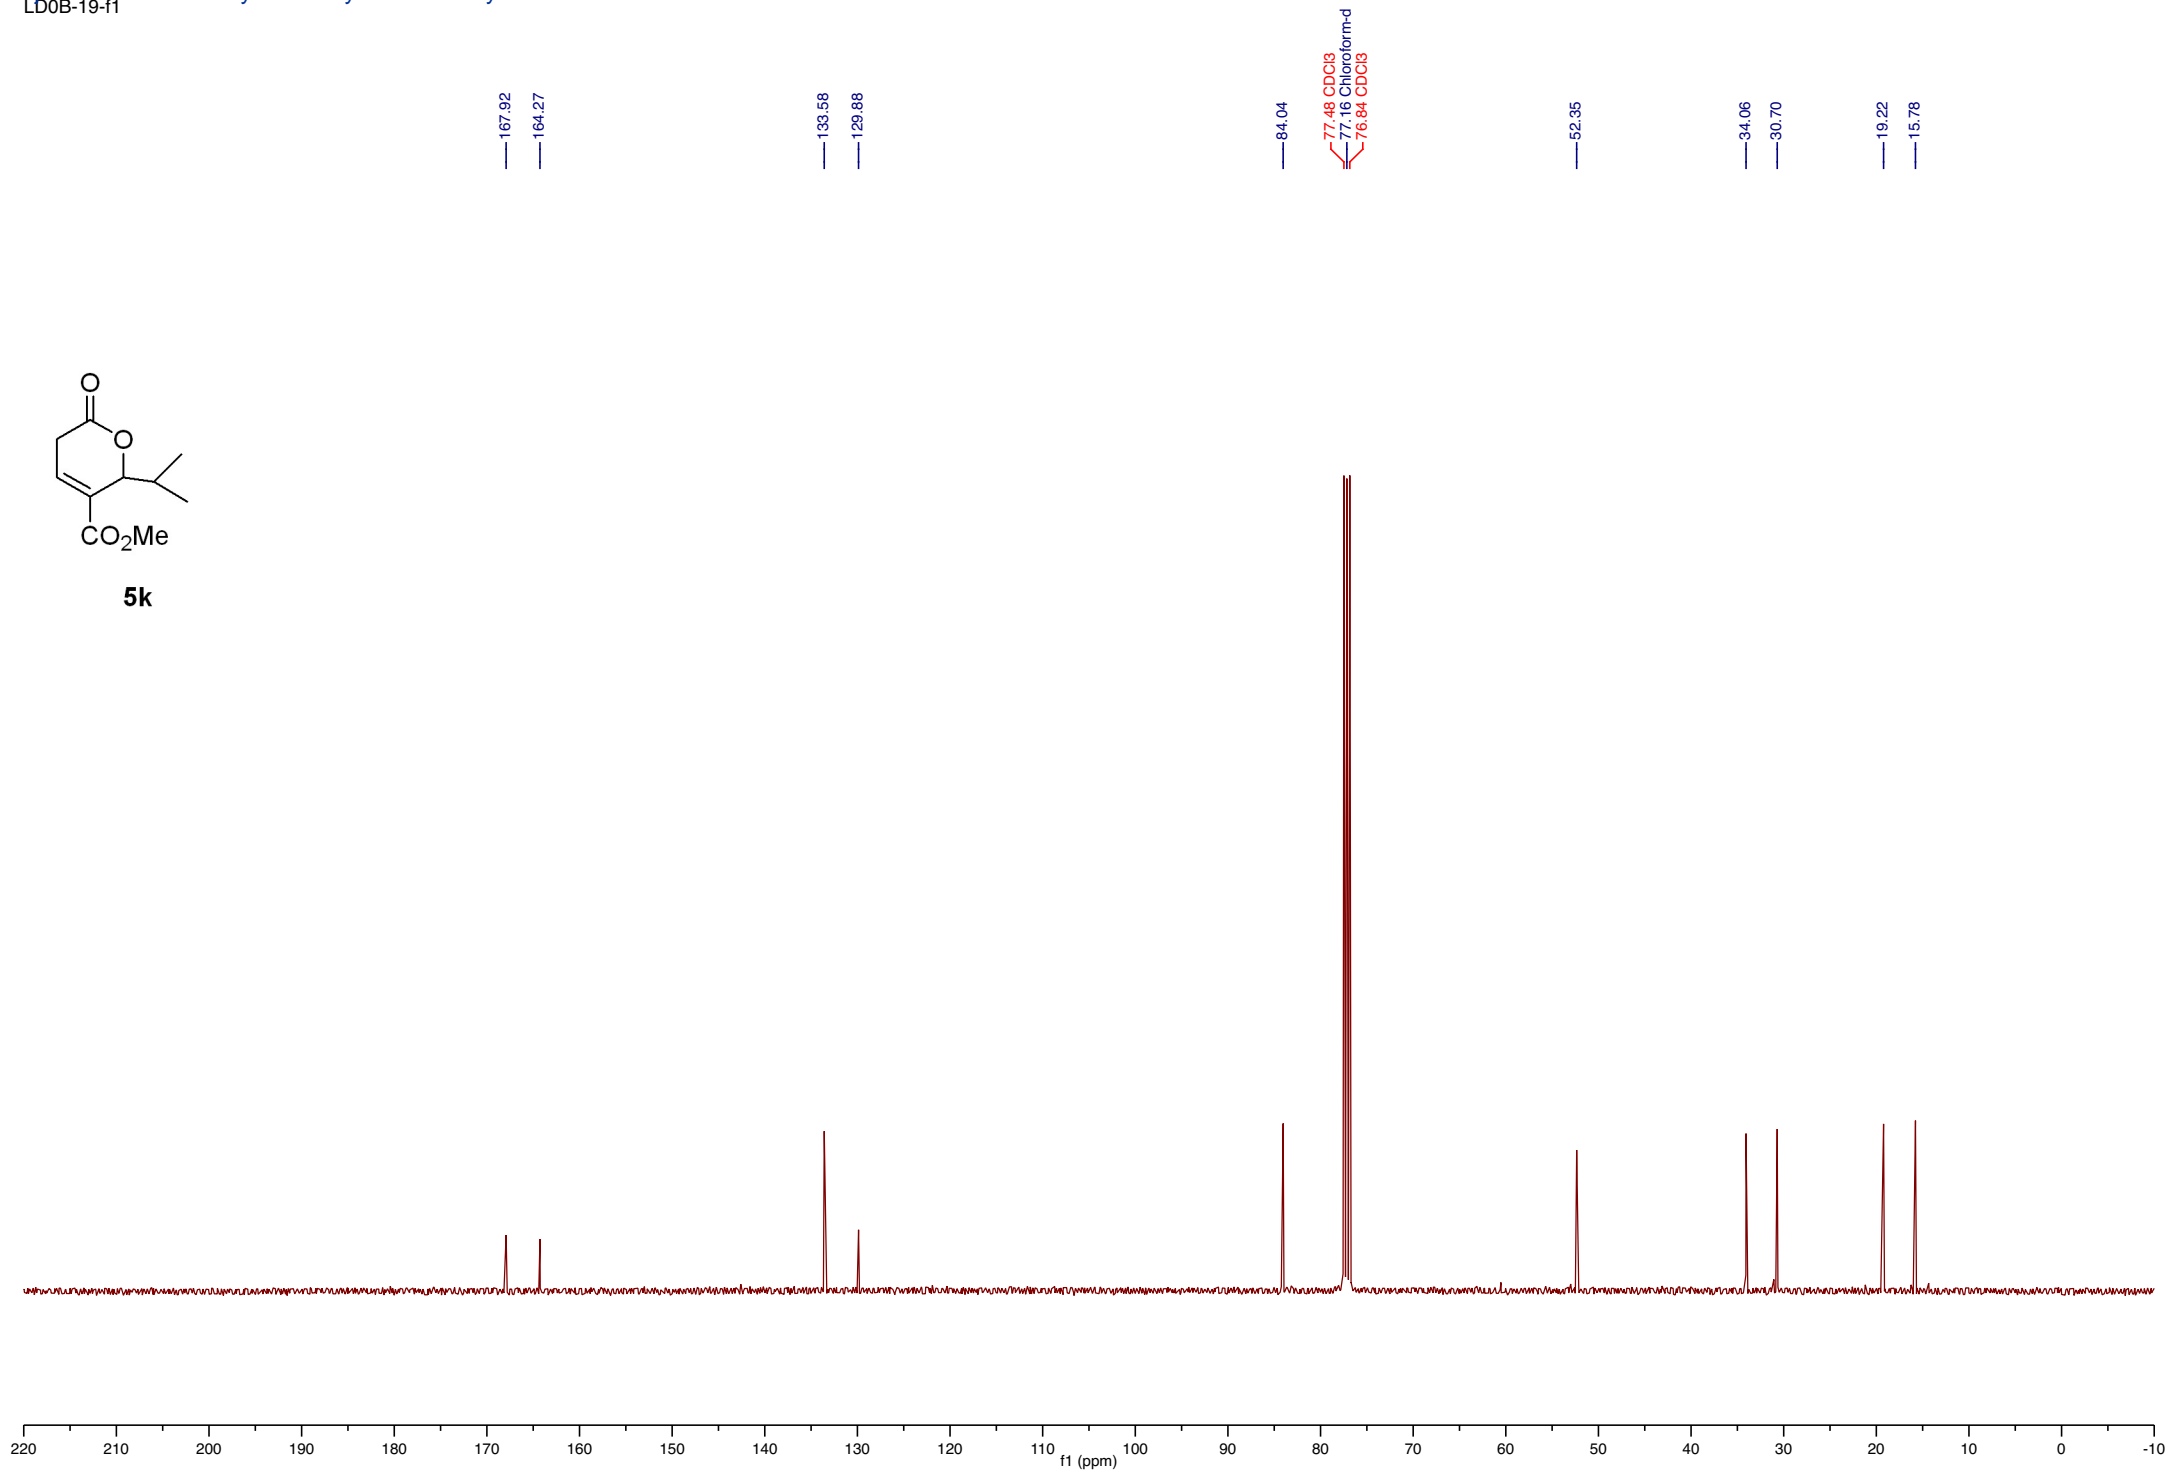

LD-cyclopropyl/1  
Spectre 13C routine en 32 Scan

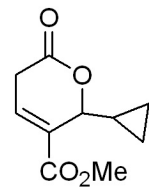

5h

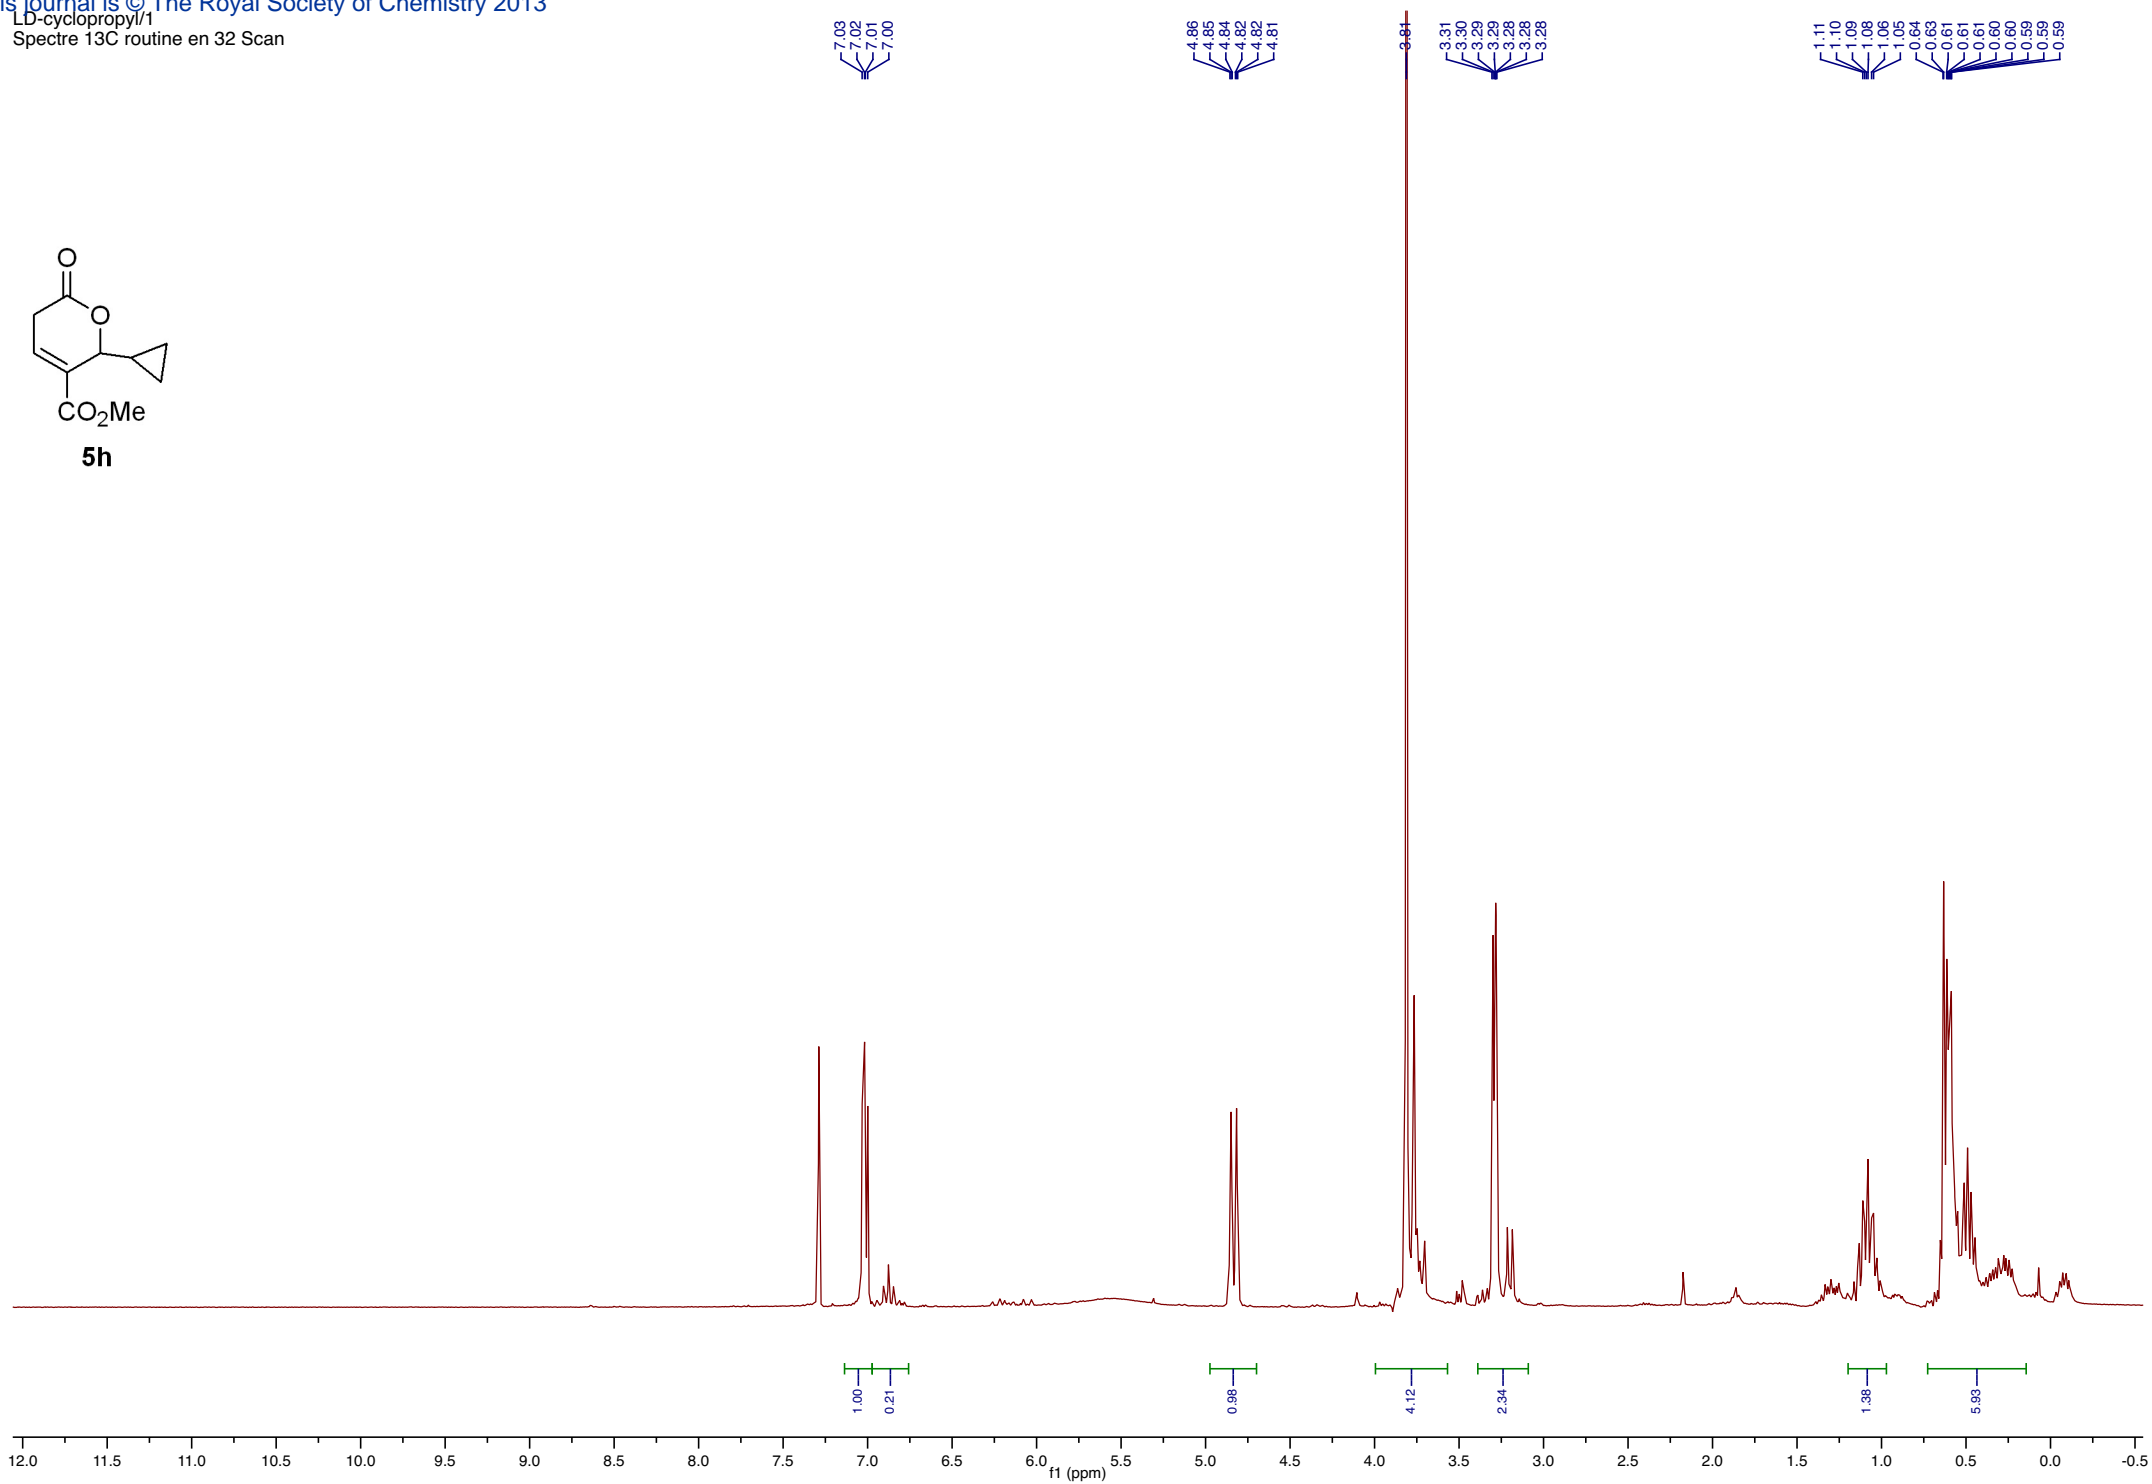

LD-cyclopropyl/2  
Spectre 13C routine en 32 Scan

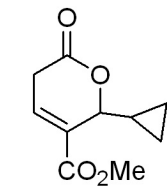

5h

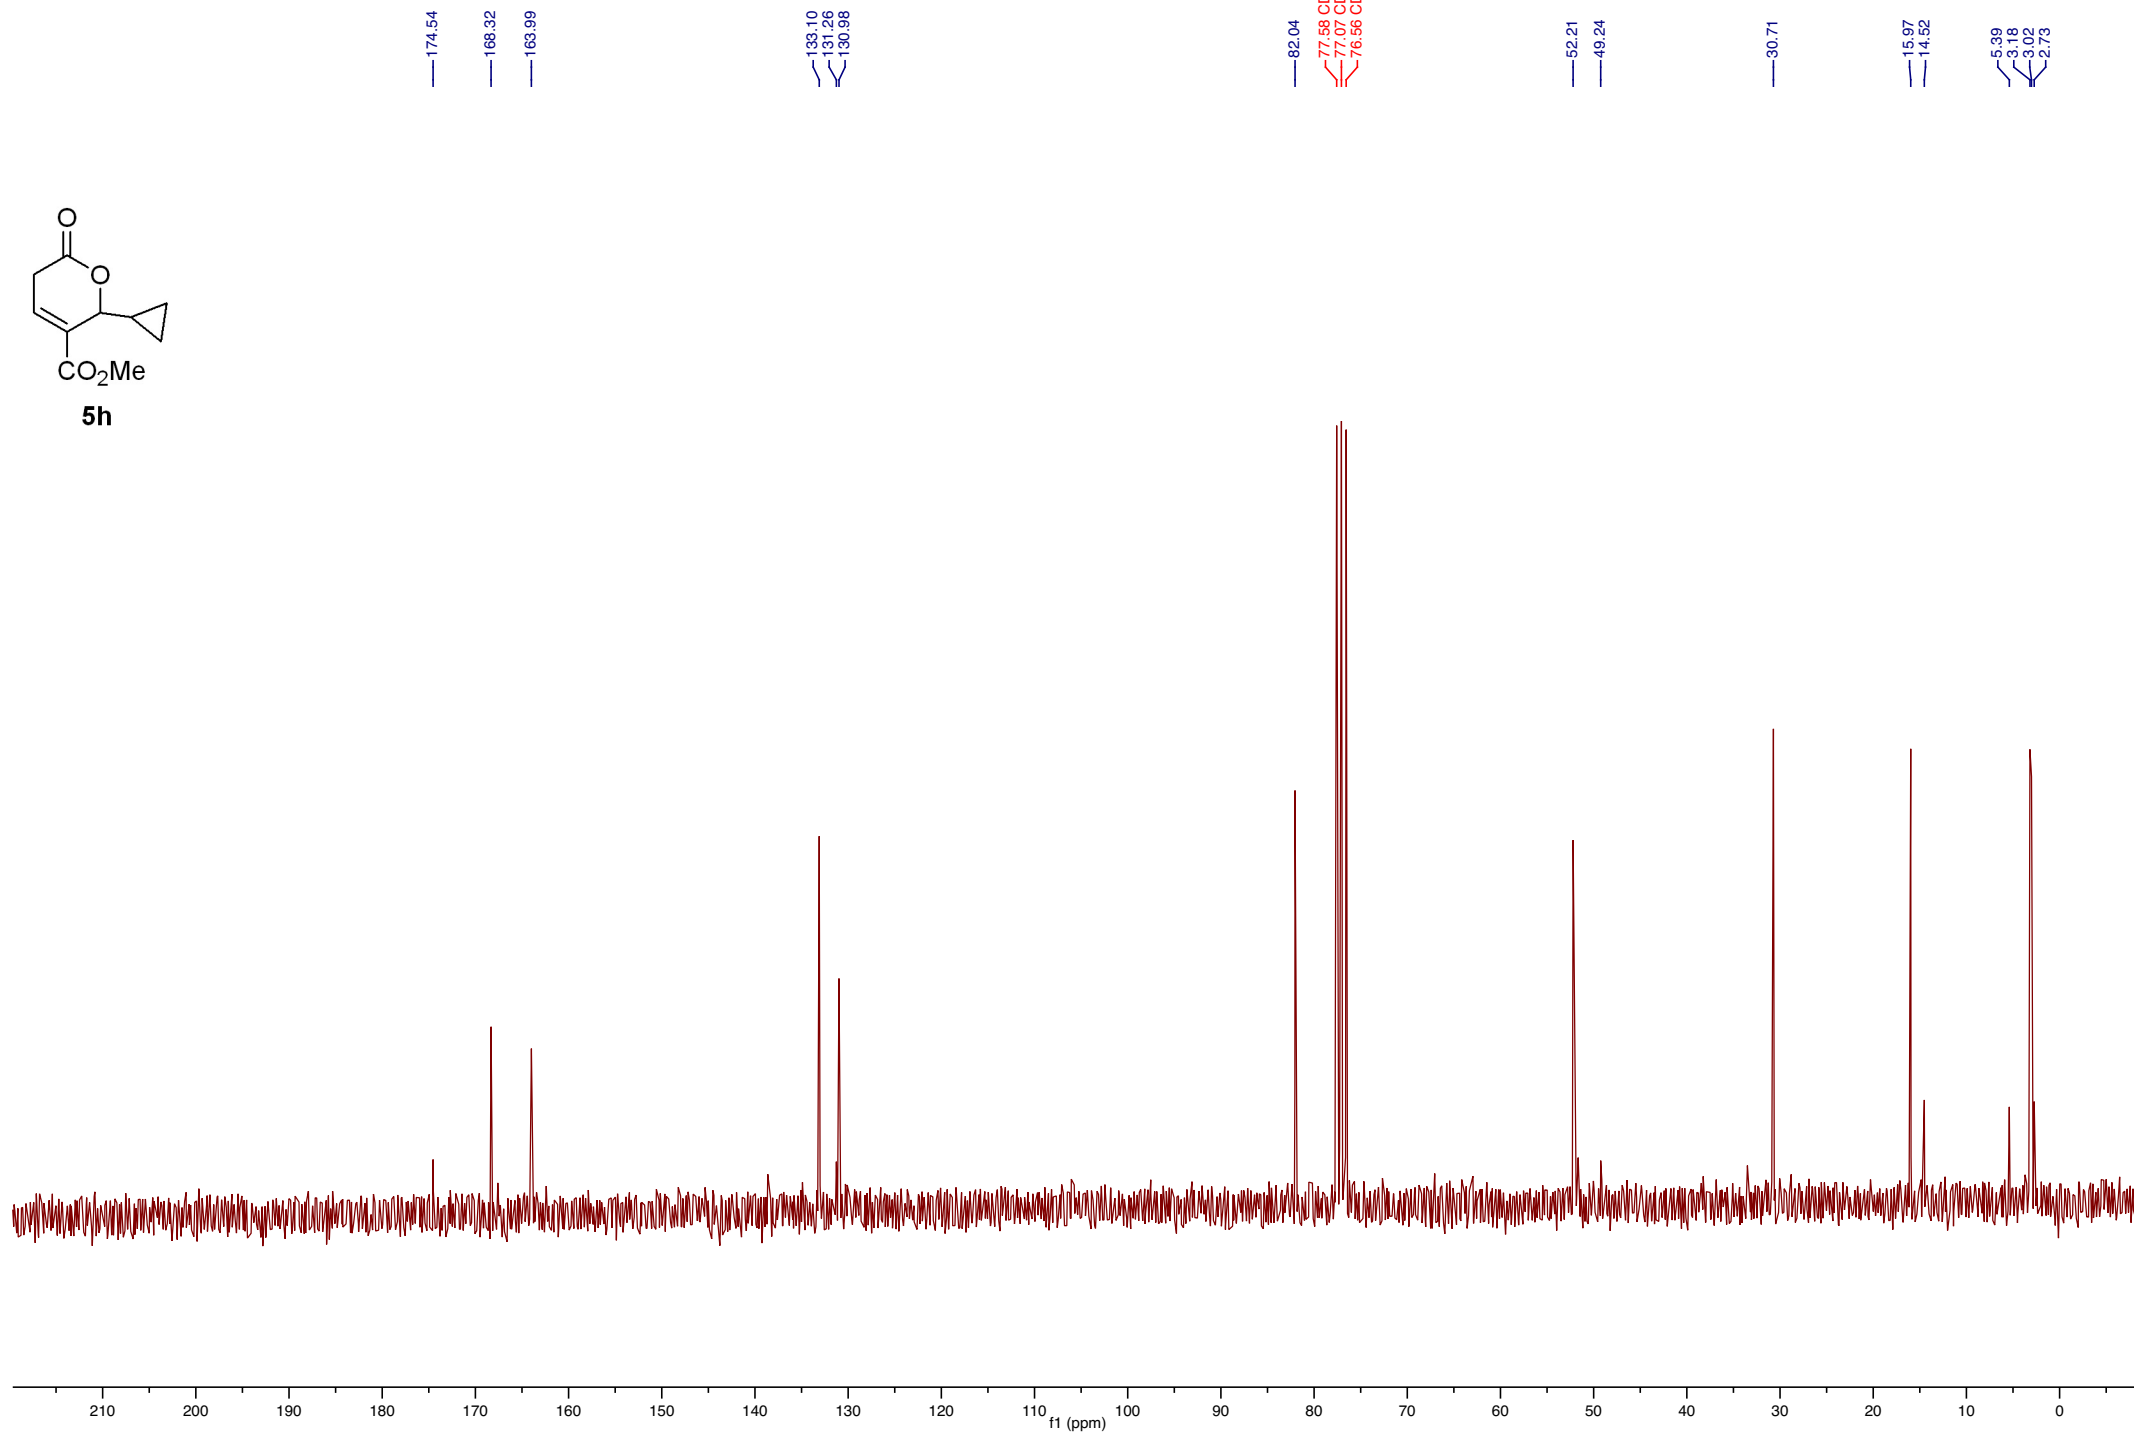

Supplement: c3ra45309j.pdf [file c3ra45309j.pdf]
